# Supplementary material for: A CRISPR screen identifies IFI6 as an ER-resident interferon effector that blocks flavivirus replication
Source: Springer Nature journal article supplement (doi:10.1038/s41564-018-0244-1), 2018-09-14
Supplement: MOESM3 [file 41564_2018_244_MOESM3_ESM.xlsx]

## Sheet: Supplementary Table 1 Overview
Supplementary Table 1. MAGeCK analysis output of CRISPR screen
This table contains the MAGeCK analysis output for the CRISPR screen shown in Figure 1. The screen was performed one time at a library coverage of approximately 900X. Statistical significance was assigned to genes with FDR < 0.01.
column heading	description
id	gene ID
num	The number of targeting sgRNAs for each gene
neg|score	The RRA lo value of this gene in negative selection
neg|p-value	The raw p-value (using permutation) of this gene in negative selection
neg|fdr	The false discovery rate of this gene in negative selection
neg|rank	The ranking of this gene in negative selection
neg|goodsgrna	The number of "good" sgRNAs, i.e., sgRNAs whose ranking is below the alpha cutoff (rank based on reads)
pos|score	The RRA lo value of this gene in positive selection
pos|p-value	The raw p-value of this gene in positive selection
pos|fdr	The false discovery rate of this gene in positive selection
pos|rank	The ranking of this gene in positive selection
pos|goodsgrna	The number of "good" sgRNAs, i.e., sgRNAs whose ranking is below the alpha cutoff (rank based on reads)

## Sheet: Supplementary Table 1 Data
id	num	neg|score	neg|p-value	neg|fdr	neg|rank	neg|goodsgrna	pos|score	pos|p-value	pos|fdr	pos|rank	pos|goodsgrna	List order
STAT2	4	1	0.99988	0.999876	20107	0	2.5051e-13	2.4615e-07	0.00055	1	4	9
IFI6	4	1	0.99988	0.999876	20106	0	2.6941e-13	2.4615e-07	0.00055	2	4	8
HSPA5	4	1	0.99988	0.999876	20105	0	2.0788e-12	2.4615e-07	0.00055	3	4	7
IFNAR2	4	0.87396	0.87387	0.999876	17544	0	3.691e-12	2.4615e-07	0.00055	4	3	2
IRF9	4	0.22602	0.35497	0.997888	7146	1	9.3729e-10	2.4615e-07	0.00055	5	3	1
ECD	4	1	0.99975	0.999876	20104	0	2.8226e-09	2.4615e-07	0.00055	6	4	6
SNRPF	4	1	0.99975	0.999876	20102	0	4.0698e-09	2.4615e-07	0.00055	7	4	3
TYK2	4	1	0.99975	0.999876	20101	0	4.7329e-09	2.4615e-07	0.00055	8	4	4
MFAP1	4	1	0.99975	0.999876	20103	0	1.8672e-08	2.4615e-07	0.00055	9	4	5
PCBP1	4	1	0.99975	0.999876	20100	0	6.4047e-08	7.3844e-07	0.001238	10	4	12
PCF11	4	1	0.99975	0.999876	20099	0	7.9122e-08	7.3844e-07	0.001238	11	4	11
JAK1	4	0.32728	0.46078	0.99918	9260	1	9.1233e-08	7.3844e-07	0.001238	12	3	10
IFNAR1	4	0.93406	0.93402	0.999876	18749	0	2.7518e-07	1.2307e-06	0.001904	13	2	13
RNF113A	4	1	0.99975	0.999876	20098	0	1.1262e-06	3.1999e-06	0.004597	14	4	14
SF3A1	4	0.86723	0.86714	0.999876	17381	0	1.4677e-06	3.6922e-06	0.004641	15	3	15
SNRPD1	4	0.99995	0.9997	0.999876	20091	0	1.6241e-06	3.6922e-06	0.004641	16	4	16
SMU1	4	1	0.99975	0.999876	20097	0	2.0167e-06	5.1691e-06	0.006115	17	4	17
NKAP	4	0.64986	0.68431	0.999876	13721	1	3.196e-06	1.1077e-05	0.012376	18	3	18
UBL5	4	0.995	0.99487	0.999876	19966	0	4.4201e-06	1.403e-05	0.014851	19	4	19
SUPT6H	4	0.99943	0.99922	0.999876	20078	0	5.3854e-06	1.8461e-05	0.018564	20	4	20
POLR2F	4	0.80948	0.80938	0.999876	16247	1	5.8018e-06	2.1907e-05	0.020981	21	3	21
NonTargetingControl_945	1	0.99999	0.99975	0.999876	20096	0	6.4906e-06	2.4861e-05	0.02217	22	1	22
PRPF8	4	0.9942	0.99407	0.999876	19951	0	6.5428e-06	2.5353e-05	0.02217	23	4	23
KCND3	4	0.99999	0.99974	0.999876	20095	0	1.0009e-05	4.1599e-05	0.03486	24	4	24
SF3B2	4	0.99999	0.99974	0.999876	20094	0	1.2026e-05	5.0952e-05	0.04099	25	4	25
C8orf48	4	0.85873	0.85863	0.999876	17217	0	1.718e-05	7.5567e-05	0.058454	26	3	26
PSMB4	4	0.99997	0.99972	0.999876	20093	0	2.9473e-05	0.00011495	0.085625	27	4	27
SMNDC1	4	0.99997	0.99972	0.999876	20092	0	3.3109e-05	0.00012873	0.092468	28	4	28
FOXD4L6	4	0.85585	0.85578	0.999876	17155	0	4.198e-05	0.00014646	0.101571	29	3	29
CTR9	4	0.99994	0.99969	0.999876	20090	0	6.2903e-05	0.00022375	0.147078	30	4	30
SEC61A1	4	0.99867	0.99849	0.999876	20056	0	6.418e-05	0.0002267	0.147078	31	4	31
USPL1	4	0.99993	0.99968	0.999876	20089	0	7.4232e-05	0.00026756	0.168162	32	4	32
RPP38	4	0.98394	0.98396	0.999876	19722	0	8.1476e-05	0.00029414	0.179268	33	3	33
FMN1	4	0.8485	0.84837	0.999876	17020	0	8.9029e-05	0.00031876	0.188556	34	3	34
ADGRE2	4	0.96636	0.96626	0.999876	19366	0	0.00011096	0.00040097	0.219515	35	3	35
KIAA0513	4	0.99989	0.99965	0.999876	20088	0	0.00011249	0.00040639	0.219515	36	4	36
FBXO32	4	0.99989	0.99965	0.999876	20087	0	0.00011343	0.00040885	0.219515	37	4	37
MCM3AP	4	0.99989	0.99964	0.999876	20086	0	0.00011486	0.00041476	0.219515	38	4	38
EIF4A3	4	0.99373	0.99361	0.999876	19939	0	0.00012275	0.0004374	0.225565	39	4	39
SAP30BP	4	0.99611	0.996	0.999876	19988	0	0.00012721	0.00045562	0.229084	40	4	40
SF3B4	4	0.99986	0.99962	0.999876	20085	0	0.00014473	0.00051937	0.254769	41	4	41
PRPF38A	4	0.38809	0.52395	0.999876	10517	1	0.00018202	0.00066189	0.31695	42	3	42
BUD13	4	0.99978	0.99955	0.999876	20084	0	0.00021623	0.00078004	0.36484	43	4	43
PI4KB	4	0.99974	0.99951	0.999876	20083	0	0.00025734	0.00092526	0.418264	44	4	44
A1CF	4	0.99973	0.9995	0.999876	20082	0	0.00026594	0.00095923	0.418264	45	4	45
KIF1C	4	0.98114	0.98112	0.999876	19676	0	0.00027037	0.00097105	0.418264	46	3	46
C1orf137	4	0.99973	0.9995	0.999876	20081	0	0.0002721	0.00097745	0.418264	47	4	47
MED11	4	0.50094	0.59982	0.999876	12024	1	0.00028555	0.0010316	0.43224	48	2	48
SON	4	0.89397	0.89384	0.999876	17926	0	0.00030239	0.0010976	0.450495	49	3	49
SNRPG	4	0.99967	0.99945	0.999876	20080	0	0.00032704	0.0011773	0.466414	50	4	50
PITPNM1	4	0.99737	0.99723	0.999876	20032	0	0.00032868	0.0011827	0.466414	51	4	51
CDC73	4	0.98808	0.98803	0.999876	19802	0	0.00033729	0.0012064	0.466584	52	4	52
NHP2L1	4	0.96855	0.96842	0.999876	19426	0	0.0003644	0.0012994	0.489091	53	2	53
RBM8A	4	0.84569	0.84553	0.999876	16962	0	0.00036776	0.0013132	0.489091	54	3	54
CT45A5	4	0.99955	0.99933	0.999876	20079	0	0.00045202	0.0016046	0.57965	55	4	55
PTGFRN	4	0.89527	0.89512	0.999876	17964	0	0.00045465	0.001614	0.57965	56	3	56
OR2T34	4	0.9897	0.98969	0.999876	19835	0	0.00050293	0.001805	0.623066	57	4	57
CCT2	4	0.87011	0.87002	0.999876	17457	0	0.00051155	0.001839	0.623066	58	3	58
CRNKL1	4	0.97494	0.97486	0.999876	19546	0	0.00051977	0.0018695	0.623066	59	3	59
SERF1A	4	0.86217	0.86208	0.999876	17280	0	0.00052839	0.001902	0.623066	60	2	60
TMEM50B	4	0.77857	0.78074	0.999876	15660	1	0.00053273	0.0019222	0.623066	61	3	61
UNC13A	4	0.86802	0.86795	0.999876	17406	0	0.00054	0.0019497	0.623066	62	3	62
ID2	4	0.97061	0.97052	0.999876	19464	0	0.0005494	0.0019802	0.623066	63	3	63
FOXI3	4	0.15652	0.28141	0.99646	5671	2	0.00055026	0.0019827	0.623066	64	2	64
NXF1	4	0.8946	0.89446	0.999876	17948	0	0.00056062	0.0020142	0.623229	65	3	65
INTS6	4	0.99904	0.99887	0.999876	20070	0	0.0006059	0.0021658	0.659991	66	4	66
CXorf57	4	0.30158	0.43412	0.99918	8725	1	0.00061759	0.0022082	0.662849	67	3	67
SNRNP200	4	0.9782	0.97809	0.999876	19618	0	0.00065538	0.002349	0.686827	68	3	68
SF3B3	4	0.98013	0.9801	0.999876	19659	0	0.00065811	0.0023564	0.686827	69	3	69
CLP1	4	0.97287	0.97282	0.999876	19514	0	0.00068245	0.0024445	0.689475	70	3	70
OR10G3	4	0.9903	0.99026	0.999876	19852	0	0.00068248	0.0024445	0.689475	71	4	71
SIGLEC10	4	0.99931	0.99912	0.999876	20077	0	0.00068827	0.0024701	0.689475	72	4	72
OR2W5	4	0.9993	0.99911	0.999876	20076	0	0.0006968	0.0025026	0.689475	73	4	73
ZBTB3	4	0.99927	0.99908	0.999876	20075	0	0.00072609	0.0025996	0.706516	74	4	74
PGLYRP3	4	0.77909	0.78122	0.999876	15670	1	0.00074698	0.0026739	0.709978	75	3	75
POLR2I	4	0.98248	0.98244	0.999876	19700	0	0.0007495	0.0026887	0.709978	76	3	76
POLR2G	4	0.90728	0.90706	0.999876	18201	0	0.0007581	0.0027182	0.709978	77	3	77
UBQLN4	4	0.63262	0.67337	0.999876	13493	1	0.0007808	0.0028068	0.723724	78	3	78
OR2L13	4	0.12755	0.25079	0.99646	5058	2	0.00080892	0.0028866	0.73224	79	2	79
PLA1A	4	0.98068	0.98067	0.999876	19666	0	0.00081517	0.0029126	0.73224	80	3	80
TRPC4AP	4	0.77404	0.77675	0.999876	15580	1	0.00083433	0.002984	0.740924	81	3	81
FLJ44635	4	0.9991	0.99893	0.999876	20074	0	0.00089694	0.0032041	0.770686	82	4	82
DDX23	4	0.9991	0.99892	0.999876	20073	0	0.00089869	0.003211	0.770686	83	4	83
CDC40	4	0.99279	0.99268	0.999876	19913	0	0.00090049	0.0032189	0.770686	84	4	84
SENP8	4	0.99908	0.99891	0.999876	20072	0	0.0009162	0.0032646	0.772452	85	4	85
TAF12	4	0.97182	0.97173	0.999876	19489	0	0.00095077	0.0033848	0.783715	86	3	86
ACPT	4	0.99905	0.99887	0.999876	20071	0	0.00095227	0.0033902	0.783715	87	4	87
SART1	4	0.81764	0.81756	0.999876	16416	0	0.00096649	0.0034522	0.784273	88	3	88
ZNF43	4	0.62447	0.66834	0.999876	13396	1	0.00097501	0.003484	0.784273	89	2	89
RBBP5	4	0.97087	0.97078	0.999876	19470	0	0.00099959	0.0035728	0.784273	90	3	90
SUPT5H	4	0.99899	0.99882	0.999876	20069	0	0.0010123	0.0036132	0.784273	91	4	91
DNAJB14	4	0.21701	0.34549	0.997888	6951	2	0.0010344	0.0036875	0.784273	92	2	92
MBOAT2	4	0.99896	0.99879	0.999876	20068	0	0.0010364	0.0036959	0.784273	93	4	93
LOC100507462	4	0.90294	0.90277	0.999876	18118	0	0.001064	0.0037943	0.784273	94	3	94
CDT1	4	0.98665	0.98663	0.999876	19768	0	0.0010711	0.0038199	0.784273	95	4	95
PLRG1	4	0.52389	0.61167	0.999876	12261	1	0.0010777	0.0038455	0.784273	96	3	96
C1orf131	4	0.99892	0.99875	0.999876	20067	0	0.0010781	0.0038465	0.784273	97	4	97
CDC23	4	0.99892	0.99875	0.999876	20066	0	0.0010809	0.0038569	0.784273	98	4	98
SNX32	4	0.98059	0.98058	0.999876	19663	0	0.0010894	0.0038849	0.784273	99	3	99
PON1	4	0.87135	0.87123	0.999876	17479	0	0.0011159	0.0039706	0.784273	100	3	100
AGAP4	4	0.99888	0.9987	0.999876	20065	0	0.0011193	0.0039814	0.784273	101	4	101
HK2	4	0.56057	0.63126	0.999876	12638	1	0.0011226	0.0039927	0.784273	102	3	102
OR4X2	4	0.99886	0.99867	0.999876	20064	0	0.0011443	0.0040695	0.784273	103	4	103
TIMM13	4	0.99885	0.99867	0.999876	20063	0	0.0011498	0.0040882	0.784273	104	4	104
OR4C12	4	0.62814	0.67061	0.999876	13438	1	0.0011678	0.0041518	0.784273	105	1	105
LIMD1	4	0.99881	0.99863	0.999876	20062	0	0.0011892	0.0042281	0.784273	106	4	106
KRTAP20-1	4	0.9988	0.99862	0.999876	20061	0	0.0011955	0.0042541	0.784273	107	4	107
KLC4	4	0.99879	0.99861	0.999876	20060	0	0.0012053	0.0042901	0.784273	108	4	108
LSM2	4	0.96823	0.96811	0.999876	19419	0	0.0012197	0.0043497	0.784273	109	3	109
CROCC	4	0.96938	0.96926	0.999876	19439	0	0.0012252	0.0043713	0.784273	110	2	110
CTDSPL2	4	0.99127	0.9912	0.999876	19882	0	0.0012506	0.0044501	0.784273	111	4	111
ARHGEF6	4	0.99875	0.99856	0.999876	20059	0	0.0012528	0.004456	0.784273	112	4	112
FBXO16	4	0.99874	0.99856	0.999876	20058	0	0.0012571	0.0044688	0.784273	113	4	113
BARD1	4	0.43753	0.56898	0.999876	11395	1	0.0012593	0.0044742	0.784273	114	3	114
TMEM8B	4	0.99872	0.99854	0.999876	20057	0	0.0012826	0.004549	0.784273	115	4	115
MRE11A	4	0.44294	0.57154	0.999876	11448	1	0.001296	0.004612	0.784273	116	3	116
KRTAP22-1	4	0.41448	0.5517	0.999876	11063	1	0.0013234	0.0047007	0.784273	117	3	117
IQGAP3	4	0.98828	0.98822	0.999876	19807	0	0.0013596	0.0048218	0.784273	118	4	118
POLD4	4	0.51503	0.60708	0.999876	12172	1	0.0013665	0.004841	0.784273	119	2	119
STX10	4	0.34755	0.48186	0.99918	9681	2	0.0013753	0.004868	0.784273	120	2	120
TMEM209	4	0.99862	0.99844	0.999876	20055	0	0.0013792	0.0048808	0.784273	121	4	121
TRDN	4	0.99315	0.99304	0.999876	19921	0	0.0013827	0.0048887	0.784273	122	4	122
NUP98	4	0.047698	0.11207	0.982438	2273	1	0.0013966	0.0049325	0.784273	123	2	123
HAPLN2	4	0.2864	0.41825	0.99918	8404	1	0.0013967	0.0049325	0.784273	124	3	124
SLC30A10	4	0.9986	0.99842	0.999876	20054	0	0.0013988	0.0049379	0.784273	125	4	125
CDC20	4	0.99603	0.99591	0.999876	19986	0	0.0014221	0.0050123	0.784273	126	4	126
ADAMTSL4	4	0.91424	0.91404	0.999876	18339	0	0.0014247	0.0050236	0.784273	127	3	127
RPRD1A	4	0.99857	0.9984	0.999876	20053	0	0.0014266	0.00503	0.784273	128	4	128
TMEM45A	4	0.89671	0.89658	0.999876	17993	0	0.0014272	0.005031	0.784273	129	3	129
RDH14	4	0.96963	0.9695	0.999876	19446	0	0.0014388	0.0050694	0.784273	130	3	130
HTR2C	4	0.99847	0.9983	0.999876	20052	0	0.0014995	0.0052624	0.807913	131	4	131
HELB	4	0.72451	0.73661	0.999876	14760	1	0.0015132	0.0053052	0.808318	132	3	132
POLR2L	4	0.9488	0.94864	0.999876	19019	0	0.0015635	0.005475	0.827924	133	3	133
EXOG	4	0.52496	0.6122	0.999876	12273	1	0.0015828	0.0055538	0.833567	134	3	134
ZNF276	4	0.99838	0.99822	0.999876	20051	0	0.0016196	0.005698	0.837414	135	4	135
ISY1-RAB43	4	0.86434	0.86426	0.999876	17318	0	0.0016346	0.0057566	0.837414	136	3	136
AQP6	4	0.95992	0.95976	0.999876	19245	0	0.0016598	0.0058418	0.837414	137	3	137
PRKAR2A	4	0.91134	0.91116	0.999876	18276	0	0.0016603	0.0058443	0.837414	138	2	138
POLR2C	4	0.85357	0.85345	0.999876	17117	0	0.0016711	0.005878	0.837414	139	3	139
TRAPPC3	4	0.99833	0.99817	0.999876	20050	0	0.0016719	0.0058787	0.837414	140	3	140
BLK	4	0.5214	0.6104	0.999876	12241	1	0.0016865	0.0059289	0.837414	141	3	141
GPN2	4	0.67227	0.69897	0.999876	14023	1	0.0016985	0.0059708	0.837414	142	3	142
PLEKHG6	4	0.99828	0.99813	0.999876	20049	0	0.0017193	0.0060362	0.837414	143	4	143
GBF1	4	0.99828	0.99812	0.999876	20048	0	0.0017246	0.0060554	0.837414	144	4	144
HSPA4	4	0.9844	0.98442	0.999876	19730	0	0.0017265	0.0060648	0.837414	145	3	145
HIST2H2BF	4	0.73838	0.74731	0.999876	14961	1	0.0017329	0.0060791	0.837414	146	3	146
TAS2R4	4	0.87136	0.87125	0.999876	17480	0	0.0017541	0.0061426	0.840405	147	2	147
POLR2H	4	0.76189	0.76634	0.999876	15357	1	0.0017902	0.0062647	0.849142	148	3	148
SLAMF6	4	0.59416	0.65021	0.999876	13029	1	0.0018098	0.0063257	0.849142	149	3	149
UIMC1	4	0.93215	0.93209	0.999876	18711	0	0.0018118	0.0063331	0.849142	150	2	150
PITPNB	4	0.40672	0.54355	0.999876	10900	1	0.0018459	0.0064389	0.852088	151	2	151
TMEM248	4	0.99813	0.99799	0.999876	20047	0	0.0018747	0.0065364	0.852088	152	4	152
PDS5B	4	0.996	0.99588	0.999876	19985	0	0.0018834	0.0065709	0.852088	153	4	153
GDF6	4	0.99811	0.99798	0.999876	20046	0	0.0018928	0.0066004	0.852088	154	4	154
PSMB3	4	0.19402	0.32121	0.997888	6454	2	0.0018939	0.0066073	0.852088	155	2	155
LDLR	4	0.99811	0.99797	0.999876	20045	0	0.0018944	0.0066093	0.852088	156	4	156
RPAP1	4	0.59518	0.65083	0.999876	13041	1	0.0019294	0.0067269	0.859611	157	3	157
CD46	4	0.99112	0.99105	0.999876	19876	0	0.0019457	0.0067685	0.859611	158	4	158
MAFF	4	0.99804	0.99792	0.999876	20044	0	0.001955	0.0067959	0.859611	159	3	159
CRAT	4	0.0011159	0.0038948	0.781933	100	1	0.0019664	0.0068431	0.860179	160	3	160
RAD9B	4	0.92704	0.92698	0.999876	18592	0	0.001992	0.0069411	0.864534	161	2	161
OR10J1	4	0.80759	0.80758	0.999876	16200	1	0.0019996	0.0069637	0.864534	162	3	162
EFTUD2	4	0.9741	0.97405	0.999876	19535	0	0.0020494	0.0071395	0.880915	163	3	163
DAPK3	4	0.0017902	0.0061913	0.870768	143	1	0.002094	0.0072758	0.884797	164	3	164
GOSR1	4	0.9979	0.99777	0.999876	20043	0	0.0020983	0.0072931	0.884797	165	4	165
CD86	4	0.39865	0.53508	0.999876	10719	2	0.0021013	0.0073029	0.884797	166	1	166
INPP4A	4	0.99788	0.99775	0.999876	20042	0	0.002118	0.007359	0.884873	167	4	167
IFT122	4	0.90881	0.90862	0.999876	18227	0	0.0021531	0.0074737	0.884873	168	3	168
EZR	4	0.95691	0.95674	0.999876	19189	0	0.0021698	0.0075269	0.884873	169	3	169
SHQ1	4	0.99782	0.9977	0.999876	20041	0	0.0021752	0.0075422	0.884873	170	4	170
NPSR1	4	0.99781	0.99768	0.999876	20040	0	0.0021891	0.0075973	0.884873	171	4	171
TRIM49D2	4	0.99626	0.99614	0.999876	19994	0	0.002205	0.0076534	0.884873	172	4	172
POLR2B	4	0.92242	0.92227	0.999876	18502	0	0.0022061	0.0076574	0.884873	173	3	173
SH3BGRL	4	0.99778	0.99765	0.999876	20039	0	0.0022242	0.0077199	0.884873	174	4	174
PRPF31	4	0.99777	0.99764	0.999876	20038	0	0.0022301	0.0077347	0.884873	175	4	175
RCOR3	4	0.99777	0.99764	0.999876	20037	0	0.0022338	0.0077435	0.884873	176	4	176
HIGD1C	4	0.84574	0.84559	0.999876	16963	0	0.0022568	0.0078198	0.888224	177	1	177
ZNF589	4	0.75966	0.76446	0.999876	15320	1	0.0023086	0.0079783	0.888224	178	2	178
NPTN	4	0.99766	0.99753	0.999876	20036	0	0.002338	0.0080832	0.888224	179	4	179
GRM3	4	0.62713	0.66998	0.999876	13427	1	0.0023605	0.0081546	0.888224	180	3	180
ANKRD20A2	4	0.28904	0.42106	0.99918	8458	1	0.0023701	0.0081925	0.888224	181	3	181
SRSF7	4	0.99464	0.99453	0.999876	19961	0	0.0023896	0.0082496	0.888224	182	4	182
PCGF3	4	0.99758	0.99744	0.999876	20035	0	0.0024194	0.0083421	0.888224	183	4	183
MPHOSPH9	4	0.54417	0.62231	0.999876	12469	1	0.0024225	0.008354	0.888224	184	3	184
POLR2J	4	0.9776	0.9775	0.999876	19605	0	0.0024234	0.0083579	0.888224	185	3	185
CTIF	4	0.99757	0.99744	0.999876	20034	0	0.0024273	0.0083707	0.888224	186	4	186
ISY1	4	0.96038	0.96026	0.999876	19252	0	0.0024755	0.0085179	0.888224	187	3	187
AKIRIN2	4	0.99193	0.99182	0.999876	19895	0	0.0025376	0.0087168	0.888224	188	4	188
INTS1	4	0.50723	0.60303	0.999876	12092	1	0.0025655	0.0088167	0.888224	189	2	189
PER2	4	0.18116	0.30762	0.99646	6203	1	0.0025812	0.0088684	0.888224	190	2	190
SERINC5	4	0.531	0.61535	0.999876	12347	1	0.0026192	0.008987	0.888224	191	3	191
NCAN	4	0.99738	0.99723	0.999876	20033	0	0.0026238	0.0089989	0.888224	192	4	192
RBKS	4	0.13967	0.26368	0.99646	5313	1	0.0026428	0.0090545	0.888224	193	2	193
RAD51AP2	4	0.99653	0.9964	0.999876	20004	0	0.0026535	0.0090894	0.888224	194	4	194
CERS6	4	0.88785	0.88772	0.999876	17809	0	0.0026571	0.0091013	0.888224	195	3	195
GDPGP1	4	0.99734	0.9972	0.999876	20031	0	0.0026614	0.0091131	0.888224	196	4	196
NCF4	4	0.62367	0.66783	0.999876	13383	1	0.0026659	0.0091323	0.888224	197	3	197
HESX1	4	0.97651	0.97641	0.999876	19581	0	0.0026714	0.0091466	0.888224	198	3	198
SNRPD3	4	0.99732	0.99718	0.999876	20030	0	0.0026778	0.0091648	0.888224	199	4	199
GLA	4	0.9666	0.96652	0.999876	19373	0	0.0026796	0.0091692	0.888224	200	3	200
WDR13	4	0.99731	0.99717	0.999876	20029	0	0.0026852	0.0091914	0.888224	201	4	201
TPTE2	4	0.99731	0.99717	0.999876	20028	0	0.0026864	0.0091987	0.888224	202	4	202
ZNF705E	4	0.60157	0.65455	0.999876	13131	1	0.0026874	0.0092022	0.888224	203	2	203
OGT	4	0.9973	0.99716	0.999876	20027	0	0.0026968	0.0092421	0.888224	204	4	204
RAD21	4	0.33525	0.469	0.99918	9415	2	0.0027115	0.0092893	0.888224	205	2	205
F11R	4	0.82433	0.82424	0.999876	16551	0	0.0027127	0.0092952	0.888224	206	3	206
DSCR4	4	0.95684	0.95667	0.999876	19186	0	0.0027147	0.0092989	0.888224	207	3	207
ATP6V0D2	4	0.84909	0.84898	0.999876	17034	0	0.0027232	0.0093223	0.888224	208	1	208
SDHD	4	0.99726	0.99712	0.999876	20026	0	0.0027385	0.0093676	0.888224	209	4	209
DDX42	4	0.99724	0.99709	0.999876	20025	0	0.0027622	0.0094483	0.888224	210	4	210
PDCD1LG2	4	0.21698	0.34545	0.997888	6950	2	0.0027681	0.0094705	0.888224	212	2	211
LIG4	4	0.83957	0.83938	0.999876	16851	0	0.0027681	0.0094705	0.888224	211	2	212
POLR2D	4	0.91557	0.91538	0.999876	18367	0	0.0027751	0.0094951	0.888224	213	3	213
TM6SF2	4	0.99722	0.99707	0.999876	20024	0	0.0027817	0.0095227	0.888224	214	4	214
BRCA2	4	0.99721	0.99707	0.999876	20022	0	0.002787	0.0095394	0.888224	216	4	215
CXXC4	4	0.99721	0.99707	0.999876	20023	0	0.002787	0.0095394	0.888224	215	4	216
SLC4A10	4	0.99717	0.99702	0.999876	20021	0	0.002826	0.0096644	0.889784	217	4	217
THAP7	4	0.99715	0.997	0.999876	20020	0	0.0028451	0.009726	0.889784	218	4	218
PIAS2	4	0.99712	0.99697	0.999876	20019	0	0.002883	0.0098476	0.889784	219	4	219
TYSND1	4	0.9971	0.99695	0.999876	20018	0	0.0029044	0.0099155	0.889784	220	4	220
ITGB8	4	0.82733	0.8272	0.999876	16609	0	0.0029111	0.0099357	0.889784	221	2	221
LMAN1	4	0.99708	0.99693	0.999876	20017	0	0.00292	0.0099638	0.889784	222	4	222
CSK	4	0.99707	0.99693	0.999876	20016	0	0.0029302	0.0099967	0.889784	223	4	223
CALY	4	0.34896	0.48329	0.99918	9726	1	0.0029305	0.0099972	0.889784	224	3	224
TMTC3	4	0.99704	0.9969	0.999876	20015	0	0.0029597	0.010099	0.889784	225	4	225
F9	4	0.086387	0.18377	0.99646	3697	1	0.0029646	0.010114	0.889784	226	2	226
SRGAP2C	4	0.98385	0.98385	0.999876	19720	0	0.0029823	0.010161	0.889784	227	3	227
RNPS1	4	0.23447	0.36394	0.99918	7315	1	0.0029958	0.010212	0.889784	228	3	228
IPO4	4	0.997	0.99686	0.999876	20014	0	0.0029994	0.010229	0.889784	229	4	229
KDM4E	4	0.99699	0.99685	0.999876	20013	0	0.0030081	0.010256	0.889784	230	4	230
CCSAP	4	0.12749	0.25073	0.99646	5056	2	0.0030084	0.010257	0.889784	231	2	231
CST2	4	0.99698	0.99684	0.999876	20012	0	0.0030241	0.010302	0.889784	232	4	232
ACVR1C	4	0.85429	0.85414	0.999876	17126	0	0.0030289	0.010318	0.889784	233	3	233
CST9	4	0.97812	0.97801	0.999876	19615	0	0.0030443	0.010371	0.889784	234	3	234
DUSP13	4	0.93076	0.93071	0.999876	18681	0	0.0030772	0.010481	0.889784	235	3	235
SLC35B1	4	0.99692	0.99678	0.999876	20011	0	0.0030804	0.010491	0.889784	236	4	236
LURAP1	4	0.28864	0.42063	0.99918	8446	1	0.0030859	0.010509	0.889784	237	2	237
SFTPB	4	0.95366	0.95352	0.999876	19117	0	0.003097	0.010544	0.889784	238	3	238
FAM102B	4	0.99689	0.99676	0.999876	20010	0	0.0031056	0.010574	0.889784	239	4	239
TMEM109	4	0.037301	0.091785	0.982438	1855	3	0.0031377	0.010676	0.889817	240	1	240
SLC30A9	4	0.38337	0.51905	0.999876	10419	2	0.003166	0.010767	0.889817	241	2	241
ZMAT2	4	0.94555	0.94536	0.999876	18958	0	0.0031727	0.010792	0.889817	242	3	242
USP17L27	4	0.99006	0.99004	0.999876	19845	0	0.0031816	0.010824	0.889817	243	4	243
ZNF862	4	0.73931	0.74803	0.999876	14976	1	0.0031892	0.010851	0.889817	244	3	244
PHKA2	4	0.93404	0.934	0.999876	18748	0	0.0031895	0.010853	0.889817	245	2	245
MAGEH1	4	0.99677	0.99663	0.999876	20009	0	0.0032262	0.010982	0.889817	246	4	246
RNASET2	4	0.32537	0.45877	0.99918	9211	1	0.0032352	0.011008	0.889817	247	3	247
KCNG3	4	0.59815	0.65256	0.999876	13087	1	0.0032413	0.011025	0.889817	248	3	248
KLHL15	4	0.9964	0.99628	0.999876	19998	0	0.0032603	0.011091	0.889817	249	4	249
RUVBL1	4	0.80208	0.80224	0.999876	16094	1	0.0032708	0.011124	0.889817	250	3	250
FBXL15	4	0.83597	0.83578	0.999876	16770	0	0.0032791	0.011148	0.889817	251	3	251
BIN2	4	0.24616	0.37617	0.99918	7566	2	0.0032814	0.011156	0.889817	252	2	252
VPS18	4	0.9854	0.98541	0.999876	19751	0	0.003292	0.011194	0.889817	253	4	253
ALX4	4	0.99668	0.99654	0.999876	20008	0	0.0033225	0.011287	0.891671	254	4	254
ZMAT5	4	0.99667	0.99654	0.999876	20007	0	0.0033304	0.011318	0.891671	255	4	255
NUP153	4	0.33439	0.46809	0.99918	9398	1	0.0033449	0.011366	0.891671	256	1	256
PPARA	4	0.99663	0.9965	0.999876	20006	0	0.0033687	0.011443	0.891671	257	4	257
USP17L25	4	0.12692	0.2501	0.99646	5040	1	0.0034045	0.011552	0.891671	258	3	258
RFC1	4	0.19422	0.32144	0.997888	6461	2	0.0034485	0.011699	0.891671	259	1	259
GRASP	4	0.99654	0.99641	0.999876	20005	0	0.0034589	0.011739	0.891671	260	4	260
SLC22A18	4	0.99653	0.99639	0.999876	20003	0	0.0034749	0.01179	0.891671	261	4	261
PPIP5K2	4	0.99652	0.99639	0.999876	20002	0	0.0034797	0.011807	0.891671	262	4	262
HPS1	4	0.9516	0.95147	0.999876	19070	0	0.0034976	0.011861	0.891671	263	3	263
CLIP2	4	0.99649	0.99636	0.999876	20001	0	0.0035073	0.011899	0.891671	264	4	264
GOLGA8J	4	0.99646	0.99634	0.999876	20000	0	0.0035355	0.011994	0.891671	265	4	265
TRPV2	4	0.56257	0.63238	0.999876	12668	1	0.0035397	0.012003	0.891671	266	3	266
OASL	4	0.99645	0.99632	0.999876	19999	0	0.003549	0.012038	0.891671	267	4	267
SCOC	4	0.82676	0.82664	0.999876	16600	0	0.003553	0.012051	0.891671	268	3	268
SLC25A51	4	0.40829	0.54515	0.999876	10929	1	0.0036303	0.012302	0.891671	269	2	269
ZNF528	4	0.27849	0.41004	0.99918	8221	2	0.0036396	0.012336	0.891671	270	2	270
ACVRL1	4	0.42963	0.56535	0.999876	11326	1	0.0036435	0.01235	0.891671	271	3	271
SNRPE	4	0.89506	0.8949	0.999876	17960	0	0.0036557	0.012385	0.891671	272	1	272
TSPAN9	4	0.99631	0.99619	0.999876	19997	0	0.0036877	0.012481	0.891671	273	4	273
ZC3H18	4	0.99629	0.99617	0.999876	19996	0	0.0037068	0.012548	0.891671	274	4	274
JUND	4	0.99627	0.99614	0.999876	19995	0	0.0037333	0.012641	0.891671	275	4	275
ZNF565	4	0.92514	0.92499	0.999876	18553	0	0.0037366	0.012656	0.891671	276	2	276
TAF6L	4	0.99598	0.99586	0.999876	19984	0	0.0037493	0.01269	0.891671	277	4	277
NMT2	4	0.16544	0.2909	0.99646	5863	1	0.0037517	0.012698	0.891671	278	2	278
ROCK1	4	0.99625	0.99612	0.999876	19993	0	0.003755	0.012708	0.891671	279	4	279
MAF	4	0.25786	0.38847	0.99918	7814	1	0.0037592	0.012723	0.891671	280	3	280
OR2A14	4	0.99624	0.99612	0.999876	19992	0	0.0037609	0.012727	0.891671	281	4	282
PPP1R8	4	0.77013	0.77332	0.999876	15494	1	0.0037611	0.012727	0.891671	282	2	281
ZNF527	4	0.99623	0.99611	0.999876	19991	0	0.0037699	0.012748	0.891671	283	4	283
MORN1	4	0.80822	0.80819	0.999876	16215	1	0.0037727	0.01276	0.891671	284	3	284
DRG1	4	0.96097	0.96087	0.999876	19263	0	0.0037781	0.012775	0.891671	285	3	285
SLAMF1	4	0.99621	0.99609	0.999876	19990	0	0.003787	0.012803	0.891671	286	4	286
OR6B1	4	0.60028	0.6538	0.999876	13117	1	0.0037876	0.012805	0.891671	287	3	287
ZNF511	4	0.99621	0.99609	0.999876	19989	0	0.0037949	0.012831	0.891671	288	4	288
FOXR2	4	0.11032	0.22572	0.99646	4532	3	0.003811	0.012883	0.891671	289	1	289
ZNF516	4	0.11346	0.23124	0.99646	4643	2	0.0038349	0.012965	0.891671	290	2	290
ERAP1	4	0.30546	0.43808	0.99918	8804	1	0.0038376	0.012971	0.891671	291	3	291
NCBP1	4	0.7951	0.79571	0.999876	15973	1	0.0038616	0.013049	0.891671	292	2	292
BLVRA	4	0.16959	0.29538	0.99646	5940	1	0.0038628	0.013054	0.891671	293	2	293
ATF3	4	0.99256	0.99245	0.999876	19908	0	0.003873	0.013084	0.891671	294	4	294
CDC7	4	0.99009	0.99006	0.999876	19847	0	0.0039037	0.013178	0.891671	295	4	295
UGT2A3	4	0.78766	0.78883	0.999876	15836	1	0.0039094	0.013193	0.891671	296	3	296
OR1J2	4	0.99609	0.99598	0.999876	19987	0	0.0039101	0.013196	0.891671	297	4	297
TIMM23	4	0.40176	0.53837	0.999876	10783	1	0.0039145	0.013212	0.891671	298	2	298
SLC25A5	4	0.99365	0.99353	0.999876	19938	0	0.0039984	0.013474	0.900845	299	4	299
C1orf53	4	0.95106	0.95091	0.999876	19062	0	0.0040098	0.013521	0.900845	300	3	300
HNRNPF	4	0.9924	0.99227	0.999876	19903	0	0.0040235	0.013568	0.900845	301	4	301
KLB	4	0.9903	0.99026	0.999876	19851	0	0.0040331	0.013595	0.900845	302	4	302
KCNA6	4	0.23359	0.36301	0.99918	7296	1	0.0040449	0.013635	0.900845	303	2	303
KIAA1468	4	0.99594	0.99582	0.999876	19983	0	0.0040591	0.013682	0.900845	304	4	304
RXRB	4	0.99593	0.99581	0.999876	19982	0	0.0040679	0.013706	0.900845	305	4	305
MINPP1	4	0.34693	0.4812	0.99918	9664	2	0.0040698	0.013714	0.900845	306	1	306
CNTN4	4	0.11988	0.24219	0.99646	4876	1	0.004082	0.013751	0.900845	307	2	307
WFDC9	4	0.60948	0.65928	0.999876	13231	1	0.0041092	0.013836	0.901262	308	3	308
IYD	4	0.99589	0.99576	0.999876	19981	0	0.0041129	0.013847	0.901262	309	4	309
ASH1L	4	0.98582	0.98581	0.999876	19757	0	0.0041272	0.013894	0.901421	310	4	310
FCAMR	4	0.99585	0.99572	0.999876	19980	0	0.0041492	0.013967	0.903235	311	4	311
XKR8	4	0.99582	0.99569	0.999876	19979	0	0.004179	0.014068	0.906813	312	4	312
FNBP1	4	0.7317	0.7421	0.999876	14865	1	0.0042084	0.014155	0.909547	313	3	313
POLR2J3	4	0.99578	0.99565	0.999876	19978	0	0.0042244	0.014205	0.909866	314	4	314
ADAL	4	0.98834	0.98828	0.999876	19809	0	0.0042541	0.014293	0.910906	315	4	315
TEF	4	0.9957	0.99558	0.999876	19977	0	0.004302	0.014463	0.910906	316	4	316
CPSF4L	4	0.57939	0.64175	0.999876	12866	1	0.0043144	0.014504	0.910906	317	2	317
R3HDM1	4	0.99568	0.99556	0.999876	19976	0	0.0043238	0.01453	0.910906	318	4	318
ADAMTS6	4	0.92934	0.92928	0.999876	18645	0	0.0043265	0.014541	0.910906	319	3	319
PPP2R2D	4	0.45334	0.57644	0.999876	11544	1	0.0043286	0.014546	0.910906	320	2	320
EIF2S1	4	0.73563	0.74515	0.999876	14927	1	0.004332	0.014562	0.910906	321	3	321
U2AF1	4	0.99071	0.99066	0.999876	19861	0	0.0043398	0.014584	0.910906	322	4	322
KCNC4	4	0.99562	0.9955	0.999876	19975	0	0.0043762	0.014697	0.913974	323	4	323
VAV2	4	0.035804	0.088826	0.982438	1803	1	0.0044063	0.014796	0.913974	325	3	324
FGFBP2	4	0.83933	0.83914	0.999876	16841	0	0.0044063	0.014796	0.913974	324	3	325
ZNF266	4	0.97984	0.97978	0.999876	19650	0	0.0044136	0.014815	0.913974	326	3	326
MBD3L4	4	0.97691	0.9768	0.999876	19589	0	0.0044337	0.014871	0.914661	327	3	327
CAMSAP3	4	0.98861	0.98857	0.999876	19814	0	0.0044748	0.014997	0.9196	328	4	328
CBWD6	4	0.35316	0.48764	0.999404	9803	2	0.0045077	0.0151	0.920002	329	2	329
C6orf203	4	0.71658	0.73062	0.999876	14647	1	0.0045129	0.015119	0.920002	330	3	330
PARD6B	4	0.235	0.36445	0.99918	7322	1	0.0045283	0.015169	0.920002	331	2	331
RBM5	4	0.99547	0.99534	0.999876	19974	0	0.0045337	0.015187	0.920002	332	4	332
GPR156	4	0.74877	0.75555	0.999876	15132	1	0.0045955	0.015386	0.921741	333	3	333
NTRK3	4	0.62407	0.66809	0.999876	13389	1	0.0046069	0.015418	0.921741	334	2	334
ZMPSTE24	4	0.88183	0.88176	0.999876	17687	0	0.0046108	0.015432	0.921741	335	3	335
ZNF317	4	0.99537	0.99526	0.999876	19973	0	0.004627	0.015478	0.921741	336	4	336
RASEF	4	0.64644	0.68212	0.999876	13668	1	0.0046391	0.015516	0.921741	337	2	337
TIPRL	4	0.86771	0.86762	0.999876	17397	0	0.0046401	0.015519	0.921741	338	3	338
PHF13	4	0.99536	0.99524	0.999876	19972	0	0.004645	0.015537	0.921741	339	4	339
SPATA20	4	0.52835	0.61398	0.999876	12319	1	0.0046909	0.015684	0.927737	340	1	340
CYP7B1	4	0.95733	0.95717	0.999876	19195	0	0.0047426	0.015838	0.933081	341	3	341
TRAM1L1	4	0.99525	0.99512	0.999876	19971	0	0.004754	0.015867	0.933081	342	4	342
ABCC2	4	0.29513	0.42744	0.99918	8585	1	0.0048461	0.016162	0.946019	343	2	343
ZWINT	4	0.99515	0.99503	0.999876	19970	0	0.0048511	0.016181	0.946019	344	4	344
EED	4	0.67361	0.6999	0.999876	14037	1	0.0048849	0.016296	0.947999	345	2	345
ATP7A	4	0.93632	0.93628	0.999876	18790	0	0.0048978	0.016339	0.947999	346	3	346
EVX1	4	0.99507	0.99494	0.999876	19969	0	0.0049303	0.016445	0.947999	347	4	347
KIF7	4	0.99505	0.99492	0.999876	19968	0	0.0049468	0.016504	0.947999	348	4	348
MINOS1-NBL1	4	0.61724	0.66391	0.999876	13312	1	0.004949	0.016513	0.947999	349	3	349
SMIM13	4	0.41835	0.55578	0.999876	11131	2	0.0049496	0.016516	0.947999	350	1	350
PVRL4	4	0.99503	0.9949	0.999876	19967	0	0.0049725	0.016599	0.947999	351	4	351
ETNK2	4	0.84172	0.84155	0.999876	16890	0	0.0049974	0.016679	0.947999	352	3	352
ZNF829	4	0.97512	0.97504	0.999876	19548	0	0.0050013	0.016689	0.947999	353	3	353
HEATR9	4	0.94687	0.94672	0.999876	18988	0	0.0050127	0.016727	0.947999	354	3	354
RPS16	4	0.99499	0.99486	0.999876	19965	0	0.0050144	0.016733	0.947999	355	4	355
SHC1	4	0.87441	0.87431	0.999876	17552	0	0.0050273	0.016781	0.948034	356	3	356
TXNDC8	4	0.48568	0.59219	0.999876	11884	1	0.0050681	0.016908	0.952506	357	2	357
KCNE3	4	0.80627	0.80633	0.999876	16177	1	0.0051008	0.017013	0.955764	358	2	358
ZYG11B	4	0.82173	0.82167	0.999876	16495	0	0.0051565	0.017196	0.959669	359	3	359
NonTargetingControl_77	1	0.99484	0.99473	0.999876	19964	0	0.00516	0.017208	0.959669	360	1	360
GPR89B	4	0.86869	0.86861	0.999876	17426	0	0.005166	0.017226	0.959669	361	3	361
OR2H1	4	0.67134	0.69836	0.999876	14011	1	0.0051861	0.017293	0.960738	362	3	362
ATP13A1	4	0.98847	0.98842	0.999876	19812	0	0.0052082	0.01736	0.961828	363	4	363
MIS18BP1	4	0.98432	0.98434	0.999876	19728	0	0.0052315	0.017432	0.963184	364	3	364
C11orf98	4	0.74401	0.75171	0.999876	15045	1	0.0052702	0.017553	0.966054	365	3	365
BPIFC	4	0.69865	0.71745	0.999876	14382	1	0.0053081	0.017682	0.966054	366	3	366
FOXH1	4	0.072398	0.15846	0.992151	3202	3	0.0053116	0.017692	0.966054	367	1	367
PACS1	4	0.99467	0.99456	0.999876	19963	0	0.0053278	0.017735	0.966054	368	4	368
FAM35A	4	0.99465	0.99453	0.999876	19962	0	0.0053549	0.017819	0.966054	369	4	369
GOT2	4	0.81208	0.81198	0.999876	16304	1	0.0053634	0.017844	0.966054	370	2	370
CKAP5	4	0.99463	0.99452	0.999876	19960	0	0.0053678	0.01786	0.966054	371	4	371
VAMP4	4	0.99459	0.99448	0.999876	19959	0	0.0054127	0.01799	0.966054	372	4	372
POLR2A	4	0.84909	0.84898	0.999876	17035	0	0.0054151	0.017998	0.966054	373	3	373
CDK17	4	0.99458	0.99447	0.999876	19958	0	0.0054169	0.018003	0.966054	374	4	374
KIF3A	4	0.47722	0.58802	0.999876	11800	1	0.0054375	0.018076	0.966054	375	2	375
BEND3	4	0.085489	0.18209	0.99646	3665	1	0.0054645	0.018155	0.966054	376	2	376
LARP4B	4	0.9945	0.99438	0.999876	19957	0	0.0055035	0.018276	0.966054	377	4	377
IRX5	4	0.19359	0.32075	0.997888	6447	2	0.0055185	0.018326	0.966054	378	2	378
RBM22	4	0.99448	0.99436	0.999876	19956	0	0.0055203	0.018336	0.966054	379	4	379
IL10RB	4	0.99446	0.99434	0.999876	19955	0	0.0055387	0.018397	0.966054	380	4	380
FGFR1OP2	4	0.87396	0.87387	0.999876	17543	0	0.0055396	0.018399	0.966054	381	3	381
ADAM10	4	0.98978	0.98976	0.999876	19839	0	0.0055702	0.018494	0.966054	382	4	382
ZGRF1	4	0.13997	0.26399	0.99646	5319	1	0.0055914	0.018557	0.966054	383	2	383
PRPS2	4	0.99439	0.99426	0.999876	19954	0	0.0056139	0.018629	0.966054	384	4	384
TMPRSS6	4	0.72144	0.7343	0.999876	14715	1	0.0056145	0.018631	0.966054	385	3	385
ALG10B	4	0.21707	0.34555	0.997888	6953	1	0.0056219	0.018657	0.966054	386	3	386
SMARCC2	4	0.92284	0.92269	0.999876	18511	0	0.0056234	0.018662	0.966054	387	3	387
ARL8B	4	0.87747	0.87735	0.999876	17608	0	0.0056669	0.01879	0.966054	388	3	388
RGPD2	4	0.054016	0.12411	0.982438	2528	3	0.0056736	0.018812	0.966054	389	1	389
CIAO1	4	0.52001	0.60966	0.999876	12220	1	0.0056806	0.018836	0.966054	390	3	390
DYDC2	4	0.93787	0.93779	0.999876	18821	0	0.0056873	0.018861	0.966054	391	3	391
PRPH	4	0.1931	0.32024	0.997888	6440	2	0.0057059	0.018923	0.966054	392	2	392
MANBAL	4	0.99429	0.99417	0.999876	19953	0	0.0057082	0.01893	0.966054	393	4	393
HMGN2	4	0.59219	0.64905	0.999876	13011	1	0.0057309	0.019011	0.966054	394	3	394
FAM126A	4	0.99421	0.99409	0.999876	19952	0	0.0057868	0.019183	0.966054	395	4	395
TCERG1L	4	0.97229	0.97223	0.999876	19496	0	0.0058053	0.019236	0.966054	396	2	396
MKL1	4	0.99418	0.99406	0.999876	19950	0	0.0058201	0.019282	0.966054	397	4	397
LIMA1	4	0.99417	0.99405	0.999876	19949	0	0.0058256	0.0193	0.966054	398	4	398
GULP1	4	0.093017	0.19543	0.99646	3940	2	0.0058287	0.019309	0.966054	399	1	399
DONSON	4	0.6485	0.68342	0.999876	13700	1	0.0058413	0.019351	0.966054	400	3	400
SUZ12	4	0.99406	0.99394	0.999876	19948	0	0.0059425	0.019669	0.966054	401	4	401
KRTAP22-2	4	0.93166	0.9316	0.999876	18700	0	0.005943	0.019671	0.966054	402	2	402
SPX	4	0.53922	0.61966	0.999876	12428	1	0.005958	0.019718	0.966054	403	3	403
TEX28	4	0.089874	0.18993	0.99646	3823	2	0.0059712	0.019754	0.966054	404	2	404
SAFB	4	0.53137	0.61554	0.999876	12353	1	0.0059797	0.019786	0.966054	405	3	405
VWC2	4	0.67497	0.70082	0.999876	14059	1	0.0059941	0.01983	0.966054	406	3	406
ARRDC2	4	0.994	0.99389	0.999876	19947	0	0.0059971	0.019841	0.966054	407	4	407
GEMIN6	4	0.994	0.99388	0.999876	19945	0	0.0060027	0.019854	0.966054	408	4	408
GRAMD3	4	0.994	0.99388	0.999876	19946	0	0.0060027	0.019854	0.966054	409	4	409
PEPD	4	0.99398	0.99386	0.999876	19944	0	0.0060212	0.019915	0.966054	410	4	410
SYDE2	4	0.13586	0.25964	0.99646	5237	2	0.006023	0.019923	0.966054	411	2	411
ANKRD40	4	0.99397	0.99386	0.999876	19943	0	0.006028	0.019943	0.966054	412	4	412
CT45A1	2	0.98676	0.98674	0.999876	19773	0	0.006053	0.020012	0.966054	413	2	413
EIF3CL	4	0.71273	0.72778	0.999876	14593	1	0.0060845	0.020102	0.966054	414	3	414
PDCD6	4	0.043226	0.10338	0.982438	2102	3	0.0061389	0.02027	0.966054	415	1	415
ELAVL1	4	0.87903	0.87894	0.999876	17638	0	0.0061416	0.020279	0.966054	416	3	416
SERTM1	4	0.91713	0.91696	0.999876	18403	0	0.0061816	0.020413	0.966054	417	3	417
NMRK2	4	0.66182	0.69202	0.999876	13881	1	0.0061905	0.020435	0.966054	418	2	418
XPR1	4	0.99379	0.99367	0.999876	19942	0	0.0062074	0.020493	0.966054	419	4	419
CDCA5	4	0.9414	0.9413	0.999876	18883	0	0.0062422	0.020604	0.966054	420	2	420
C14orf28	4	0.99374	0.99362	0.999876	19941	0	0.0062627	0.020666	0.966054	421	4	421
OLIG1	4	0.99373	0.99361	0.999876	19940	0	0.0062668	0.020678	0.966054	422	4	422
CWC22	4	0.73158	0.74201	0.999876	14864	1	0.0062939	0.020764	0.966054	423	3	423
CASC5	4	0.84197	0.8418	0.999876	16895	0	0.0063456	0.020945	0.966054	424	2	424
NDUFAF5	4	0.99362	0.9935	0.999876	19937	0	0.0063815	0.021059	0.966054	425	4	425
PRPSAP1	4	0.95748	0.95731	0.999876	19198	0	0.0063919	0.021091	0.966054	426	3	426
CNGA1	4	0.93972	0.93963	0.999876	18857	0	0.0063973	0.021113	0.966054	427	2	427
POU2F1	4	0.9936	0.99348	0.999876	19936	0	0.006402	0.021131	0.966054	428	4	428
EIF2S3	4	0.99359	0.99347	0.999876	19935	0	0.0064102	0.021158	0.966054	429	4	429
ATAD2	4	0.56162	0.63186	0.999876	12655	1	0.0064489	0.021292	0.966054	430	2	430
OR4Q3	4	0.99355	0.99343	0.999876	19934	0	0.0064509	0.021297	0.966054	431	4	431
TP53BP2	4	0.77762	0.7799	0.999876	15640	1	0.0064658	0.021343	0.966054	432	3	432
PDE8A	4	0.99352	0.99341	0.999876	19933	0	0.0064758	0.021374	0.966054	433	4	433
VAV3	4	0.16115	0.28635	0.99646	5767	2	0.0064894	0.021414	0.966054	434	2	434
SERPINF2	4	0.15144	0.27613	0.99646	5548	1	0.0065006	0.021453	0.966054	435	2	435
PAFAH1B3	4	0.99349	0.99338	0.999876	19931	0	0.0065114	0.021484	0.966054	436	4	436
GTF3C2	4	0.99349	0.99338	0.999876	19932	0	0.0065114	0.021484	0.966054	437	4	437
AKAP8L	4	0.99348	0.99337	0.999876	19930	0	0.0065156	0.021504	0.966054	438	4	438
PRSS38	4	0.99345	0.99333	0.999876	19929	0	0.006549	0.02161	0.966054	439	4	439
MARCH6	4	0.059258	0.13402	0.986611	2732	1	0.0065523	0.021623	0.966054	440	3	440
PPP2R2A	4	0.99343	0.99331	0.999876	19928	0	0.0065717	0.021676	0.966054	441	4	441
FBXO8	4	0.99343	0.99331	0.999876	19927	0	0.0065741	0.021685	0.966054	442	4	442
CCT3	4	0.12215	0.24503	0.99646	4931	1	0.0065876	0.021721	0.966054	443	2	443
AARS	4	0.99341	0.99329	0.999876	19926	0	0.0065945	0.021741	0.966054	444	4	444
NLRP1	4	0.85881	0.85871	0.999876	17219	0	0.0066166	0.021811	0.966054	445	3	445
OR6C70	4	0.99338	0.99326	0.999876	19925	0	0.0066198	0.021818	0.966054	446	4	446
TMEM134	4	0.31501	0.44793	0.99918	8992	1	0.0066309	0.021848	0.966054	447	3	447
DMTF1	4	0.99336	0.99325	0.999876	19924	0	0.0066403	0.02188	0.966054	448	4	448
PCNA	4	0.74122	0.74952	0.999876	15007	1	0.0066452	0.021891	0.966054	449	3	449
AFAP1L2	4	0.79367	0.79437	0.999876	15948	1	0.0066556	0.021922	0.966054	450	1	450
ZNF155	4	0.87547	0.87539	0.999876	17568	0	0.0066593	0.021932	0.966054	451	2	451
TVP23C-CDRT4	4	0.30362	0.43622	0.99918	8765	1	0.006681	0.022003	0.966054	452	3	452
SLC16A4	4	0.2577	0.3883	0.99918	7810	1	0.0067073	0.022083	0.966054	453	3	453
LRP12	4	0.56479	0.63361	0.999876	12699	1	0.0067489	0.022204	0.966054	454	3	454
RIT1	4	0.93769	0.93761	0.999876	18817	0	0.0067637	0.022244	0.966054	455	3	455
NonTargetingControl_656	1	0.99323	0.99312	0.999876	19923	0	0.0067697	0.022262	0.966054	456	1	456
TCEB3B	4	0.9932	0.99309	0.999876	19922	0	0.0068049	0.02237	0.966054	457	4	457
SAP30L	4	0.99315	0.99304	0.999876	19920	0	0.006853	0.022545	0.966054	458	4	458
BCL2L2-PABPN1	4	0.87482	0.87475	0.999876	17560	0	0.0068623	0.022568	0.966054	459	3	459
CALR	4	0.14176	0.26591	0.99646	5351	1	0.0069167	0.022742	0.966054	460	3	460
PRR13	4	0.9724	0.97234	0.999876	19501	0	0.0069319	0.022791	0.966054	461	3	461
DNAJB5	4	0.97856	0.97844	0.999876	19631	0	0.0069369	0.022806	0.966054	462	2	462
SMG7	4	0.99267	0.99257	0.999876	19909	0	0.0069491	0.022831	0.966054	463	4	463
SOCS4	4	0.22546	0.35438	0.997888	7127	1	0.0069656	0.022879	0.966054	464	2	464
FCGR1A	4	0.32558	0.45901	0.99918	9217	1	0.0069673	0.022885	0.966054	465	2	465
OR14A16	4	0.99303	0.99292	0.999876	19919	0	0.0069725	0.022901	0.966054	466	4	466
SLC25A44	4	0.99302	0.99291	0.999876	19918	0	0.0069838	0.022938	0.966054	467	4	468
MAGEA6	4	0.70969	0.72555	0.999876	14551	1	0.0069839	0.022938	0.966054	468	3	467
DUT	4	0.99299	0.99289	0.999876	19917	0	0.0070057	0.022996	0.966054	469	4	469
GATAD2B	4	0.012925	0.040923	0.97167	831	3	0.0070172	0.023035	0.966054	470	1	470
FOXI2	4	0.99297	0.99287	0.999876	19916	0	0.0070265	0.023058	0.966054	471	4	471
CPSF3L	4	0.92396	0.92383	0.999876	18534	0	0.007051	0.023134	0.966054	472	2	472
CTSC	4	0.12654	0.2497	0.99646	5028	1	0.0070516	0.023136	0.966054	473	2	473
EVA1A	4	0.99295	0.99284	0.999876	19915	0	0.0070549	0.023148	0.966054	474	4	474
IPO7	4	0.92695	0.92687	0.999876	18587	0	0.0070689	0.023189	0.966054	475	2	475
KIAA0232	4	0.91906	0.91887	0.999876	18440	0	0.0070842	0.023237	0.966054	476	2	476
PHACTR1	4	0.12695	0.25015	0.99646	5043	1	0.0070903	0.023258	0.966054	477	2	477
HSD17B14	4	0.5893	0.6474	0.999876	12981	1	0.0070995	0.023287	0.966054	478	3	478
CTSH	4	0.37667	0.5121	0.999876	10280	2	0.0071205	0.023358	0.966054	479	2	479
NUP85	4	0.99286	0.99275	0.999876	19914	0	0.0071432	0.02343	0.966054	480	4	480
RUVBL2	4	0.2828	0.41451	0.99918	8313	2	0.0071722	0.023517	0.966054	481	1	481
GART	4	0.99278	0.99267	0.999876	19912	0	0.0072232	0.023681	0.966054	482	4	482
GINS1	4	0.43184	0.5664	0.999876	11347	1	0.0072402	0.023734	0.966054	483	3	483
AGTPBP1	4	0.99275	0.99264	0.999876	19911	0	0.0072496	0.023763	0.966054	484	4	484
INTS5	4	0.99275	0.99264	0.999876	19910	0	0.0072509	0.023768	0.966054	485	4	485
FAM19A3	4	0.049242	0.11506	0.982438	2334	3	0.0072755	0.023852	0.966054	486	1	486
RPS27	4	0.79845	0.79881	0.999876	16043	1	0.0073271	0.024003	0.966054	487	3	487
KRTAP20-3	4	0.98933	0.9893	0.999876	19826	0	0.0073727	0.024162	0.966054	488	4	488
SCP2	4	0.030539	0.078387	0.982438	1592	2	0.0073787	0.024181	0.966054	489	2	489
DAZ1	4	0.95011	0.94994	0.999876	19045	0	0.0074023	0.024254	0.966054	490	3	490
CH17-360D5.1	4	0.20575	0.33354	0.997888	6711	1	0.007409	0.024275	0.966054	491	2	491
POLR2K	4	0.8756	0.87552	0.999876	17571	0	0.0074297	0.024337	0.966054	492	3	492
RBM17	4	0.73898	0.74777	0.999876	14972	1	0.0074304	0.024339	0.966054	493	2	493
PMPCA	4	0.99256	0.99244	0.999876	19907	0	0.0074418	0.024377	0.966054	494	4	494
TBC1D3L	4	0.63698	0.6761	0.999876	13561	1	0.007456	0.024425	0.966054	495	2	495
DPEP1	4	0.93624	0.93619	0.999876	18788	0	0.0074927	0.024542	0.966054	496	3	496
PTCHD3	4	0.99247	0.99235	0.999876	19906	0	0.0075257	0.024648	0.966054	497	4	497
LIN7A	4	0.99244	0.99231	0.999876	19905	0	0.0075643	0.024774	0.966054	498	4	498
RCAN2	4	0.99242	0.99229	0.999876	19904	0	0.0075803	0.024831	0.966054	499	4	499
MSTN	4	0.87648	0.8764	0.999876	17584	0	0.0075853	0.024848	0.966054	500	2	500
NCKAP1L	4	0.73769	0.74678	0.999876	14957	1	0.0076369	0.025018	0.966054	502	1	501
PSMC6	4	0.93345	0.9334	0.999876	18735	0	0.0076369	0.025018	0.966054	501	3	502
INTS4	4	0.85499	0.85487	0.999876	17142	0	0.0076447	0.025048	0.966054	503	3	503
ELAC2	4	0.99233	0.9922	0.999876	19902	0	0.0076707	0.025126	0.966054	504	4	504
SEC24B	4	0.92821	0.92812	0.999876	18618	0	0.0076885	0.025182	0.966054	505	1	505
THNSL2	4	0.93891	0.93881	0.999876	18841	0	0.0077221	0.025283	0.966054	506	3	506
NRL	4	0.099346	0.20669	0.99646	4155	2	0.0077401	0.025329	0.966054	507	1	507
FAU	4	0.99221	0.9921	0.999876	19901	0	0.0077912	0.02547	0.966054	508	4	508
PARD3	4	0.17502	0.30114	0.99646	6067	1	0.0077941	0.025479	0.966054	509	2	509
HIST1H3F	4	0.9922	0.99209	0.999876	19900	0	0.0078041	0.025505	0.966054	510	4	510
CT45A3	4	0.17303	0.29907	0.99646	6013	2	0.0078434	0.025624	0.966054	511	2	511
CENPB	4	0.013279	0.041943	0.97167	847	1	0.0078603	0.025672	0.966054	512	2	512
SLC51B	4	0.7095	0.7254	0.999876	14549	1	0.007861	0.025675	0.966054	513	2	513
TEX35	4	0.62804	0.67055	0.999876	13437	1	0.0078637	0.025683	0.966054	514	3	514
MAN2A1	4	0.99212	0.99201	0.999876	19899	0	0.0078766	0.025717	0.966054	515	4	515
TMEM9	4	0.21141	0.33958	0.997888	6835	1	0.0078798	0.025731	0.966054	516	2	516
ELF2	4	0.80292	0.80306	0.999876	16110	1	0.007895	0.025773	0.966054	517	2	517
MEOX2	4	0.12537	0.24843	0.99646	5003	2	0.007912	0.025825	0.966054	518	2	518
CCKBR	4	0.99207	0.99196	0.999876	19898	0	0.007931	0.025882	0.966054	519	4	519
ZNF469	4	0.31557	0.4485	0.99918	9006	1	0.0079333	0.025889	0.966054	520	3	520
PRKX	4	0.14942	0.27398	0.99646	5510	2	0.0079466	0.025929	0.966054	521	1	521
RABGAP1L	4	0.99202	0.99191	0.999876	19897	0	0.0079829	0.02604	0.966054	522	4	522
RSAD2	4	0.80871	0.80867	0.999876	16228	1	0.0079896	0.026062	0.966054	523	3	523
BUB1B	4	0.95995	0.95979	0.999876	19247	0	0.007993	0.026071	0.966054	524	3	524
PPP1CB	4	0.78217	0.78397	0.999876	15723	1	0.0079982	0.026088	0.966054	525	2	525
HIST2H2AA4	4	0.17775	0.30404	0.99646	6129	1	0.008009	0.026121	0.966054	526	2	526
HIST2H2AB	4	0.55331	0.62726	0.999876	12557	1	0.0080403	0.026211	0.966054	527	3	527
MAT2A	4	0.99195	0.99184	0.999876	19896	0	0.0080517	0.026244	0.966054	528	4	528
TP53RK	4	0.99192	0.99181	0.999876	19894	0	0.0080825	0.02635	0.966054	529	4	529
ATP2B1	4	0.95623	0.95607	0.999876	19172	0	0.0081098	0.026428	0.966054	530	3	530
FAM71A	4	0.39622	0.5325	0.999876	10674	1	0.0081531	0.026568	0.966054	531	2	531
TRAIP	4	0.63136	0.6726	0.999876	13475	1	0.0081912	0.026686	0.966054	532	3	532
PIGR	4	0.91824	0.91804	0.999876	18427	0	0.0081912	0.026686	0.966054	533	2	533
PPP1R18	4	0.9495	0.94934	0.999876	19035	0	0.0081994	0.026708	0.966054	534	3	534
POTEE	4	0.42331	0.56104	0.999876	11241	1	0.0082047	0.026725	0.966054	535	2	535
ATP1A2	4	0.53955	0.61984	0.999876	12430	1	0.0082136	0.026751	0.966054	536	3	536
CBLC	4	0.96792	0.96781	0.999876	19409	0	0.0082277	0.02679	0.966054	537	3	537
ENKD1	4	0.99176	0.99167	0.999876	19893	0	0.0082354	0.026821	0.966054	538	4	538
NIT2	4	0.9038	0.90362	0.999876	18136	0	0.0082563	0.02688	0.966054	539	3	539
MROH9	4	0.6749	0.70077	0.999876	14057	1	0.0082871	0.026978	0.966054	540	2	540
KY	4	0.8043	0.80438	0.999876	16140	1	0.0083079	0.02705	0.966054	541	2	541
NKX2-6	4	0.99169	0.99159	0.999876	19892	0	0.0083088	0.027052	0.966054	542	4	542
VRK1	4	0.99168	0.99158	0.999876	19891	0	0.0083224	0.027093	0.966054	543	4	543
PLXDC1	4	0.92049	0.92034	0.999876	18471	0	0.0083256	0.027103	0.966054	544	3	544
USP25	4	0.99167	0.99158	0.999876	19890	0	0.0083281	0.027111	0.966054	545	4	545
CCDC68	4	0.99166	0.99157	0.999876	19889	0	0.0083367	0.027134	0.966054	546	4	546
DEDD	4	0.19435	0.3216	0.997888	6464	1	0.0083595	0.0272	0.966054	547	2	547
SLC18A2	4	0.99159	0.99149	0.999876	19888	0	0.0084093	0.027346	0.966054	548	4	548
FMO2	4	0.99159	0.99149	0.999876	19887	0	0.0084129	0.027357	0.966054	549	4	549
UBR2	4	0.81414	0.81408	0.999876	16348	1	0.0084357	0.027423	0.966054	550	3	550
GPA33	4	0.78124	0.78316	0.999876	15706	1	0.0084416	0.027441	0.966054	551	2	551
SNW1	4	0.82953	0.82939	0.999876	16651	0	0.0085143	0.027676	0.966054	552	2	552
DBF4	4	0.65113	0.68511	0.999876	13735	1	0.0085556	0.027793	0.966054	553	3	553
OAZ1	4	0.78395	0.78555	0.999876	15753	1	0.0085658	0.027821	0.966054	554	2	554
WSCD2	4	0.37319	0.50844	0.999876	10203	1	0.0085662	0.027822	0.966054	555	3	555
GOLT1B	4	0.89628	0.89613	0.999876	17985	0	0.0085782	0.027861	0.966054	556	3	556
CNNM1	4	0.99139	0.99132	0.999876	19886	0	0.0086063	0.027959	0.966054	557	4	557
PCDHA9	4	0.58636	0.64572	0.999876	12944	1	0.0086174	0.027989	0.966054	558	2	558
IFIH1	4	0.78482	0.78632	0.999876	15770	1	0.0086313	0.02803	0.966054	559	3	559
PSMC3	4	0.99134	0.99128	0.999876	19885	0	0.0086563	0.028102	0.966054	560	4	560
SLMO2	4	0.99134	0.99127	0.999876	19884	0	0.00866	0.028115	0.966054	561	4	561
C6orf120	4	0.99133	0.99126	0.999876	19883	0	0.0086659	0.028137	0.966054	562	4	562
CDC45	4	0.48489	0.59181	0.999876	11873	1	0.008669	0.028147	0.966054	563	2	563
FADS2	4	0.87252	0.87244	0.999876	17503	0	0.0086704	0.028152	0.966054	564	2	564
ACVR2A	4	0.54601	0.62328	0.999876	12489	1	0.0087113	0.02827	0.966054	565	3	565
SGCA	4	0.65899	0.69017	0.999876	13846	1	0.0087186	0.02829	0.966054	566	3	566
MEF2BNB	4	0.99127	0.9912	0.999876	19881	0	0.0087317	0.028324	0.966054	567	4	567
CD200R1	4	0.99125	0.99119	0.999876	19880	0	0.0087451	0.028362	0.966054	568	4	568
HSF2BP	4	0.55916	0.63048	0.999876	12626	1	0.0087491	0.028374	0.966054	569	3	569
TEX43	4	0.090297	0.1907	0.99646	3841	3	0.0087722	0.028453	0.966054	570	1	570
PDCD2	4	0.99122	0.99115	0.999876	19879	0	0.008783	0.028482	0.966054	571	4	571
RIPK2	4	0.99121	0.99115	0.999876	19878	0	0.0087867	0.028489	0.966054	572	4	572
GPRIN1	4	0.62662	0.66967	0.999876	13419	1	0.0088238	0.028599	0.966054	573	2	573
CCDC178	4	0.39696	0.53332	0.999876	10685	1	0.0088753	0.028749	0.966054	574	3	574
SAXO1	4	0.99112	0.99105	0.999876	19877	0	0.0088757	0.028751	0.966054	575	4	575
ATP6V1G1	4	0.99111	0.99104	0.999876	19875	0	0.008887	0.028787	0.966054	576	4	576
NES	4	0.99111	0.99104	0.999876	19874	0	0.0088938	0.028812	0.966054	577	4	577
GOLGA6L10	4	0.92545	0.92531	0.999876	18559	0	0.008902	0.028839	0.966054	578	2	578
MB21D2	4	0.17518	0.30131	0.99646	6071	2	0.0089077	0.028862	0.966054	579	2	579
ZNF529	4	0.99109	0.99102	0.999876	19873	0	0.0089126	0.028878	0.966054	580	4	580
ZNF257	4	0.23268	0.36203	0.99918	7281	1	0.0089258	0.028919	0.966054	581	3	581
EYA3	4	0.92994	0.92988	0.999876	18658	0	0.0089269	0.028922	0.966054	582	3	582
AHSA1	4	0.98787	0.98781	0.999876	19797	0	0.0089332	0.028944	0.966054	583	4	583
GABPB1	4	0.99106	0.99099	0.999876	19872	0	0.0089412	0.028964	0.966054	584	4	584
PITHD1	4	0.99103	0.99096	0.999876	19871	0	0.0089677	0.029047	0.966054	585	4	585
MLLT11	4	0.97853	0.97841	0.999876	19630	0	0.0089785	0.029082	0.966054	586	3	586
TGDS	4	0.71872	0.73224	0.999876	14678	1	0.008979	0.029084	0.966054	587	3	587
CDC27	4	0.98731	0.98727	0.999876	19783	0	0.0089926	0.029125	0.966054	588	4	588
VPS37C	4	0.99098	0.99092	0.999876	19870	0	0.0090193	0.029197	0.966054	589	4	589
STKLD1	4	0.99098	0.99092	0.999876	19869	0	0.0090231	0.029212	0.966054	590	4	590
METTL17	4	0.79021	0.79122	0.999876	15890	1	0.0090301	0.029235	0.966054	591	1	591
EWSR1	4	0.99093	0.99088	0.999876	19868	0	0.0090672	0.029342	0.966054	592	4	592
MAP3K1	4	0.1895	0.31643	0.997888	6376	1	0.0090773	0.029366	0.966054	593	3	593
SERPINI2	4	0.60886	0.65891	0.999876	13220	1	0.0090816	0.029379	0.966054	594	1	594
KCNIP3	4	0.99089	0.99083	0.999876	19867	0	0.0091062	0.029451	0.966054	595	4	595
RPLP0	4	0.99089	0.99082	0.999876	19866	0	0.0091115	0.029468	0.966054	596	4	596
GAGE12I	4	0.89953	0.8994	0.999876	18057	0	0.0091332	0.029532	0.966054	597	3	597
CTSF	4	0.99083	0.99077	0.999876	19865	0	0.0091714	0.029657	0.966054	598	4	598
ENDOU	4	0.99082	0.99076	0.999876	19864	0	0.0091791	0.029679	0.966054	599	4	599
TMEM242	4	0.23547	0.36495	0.99918	7336	2	0.0091848	0.029704	0.966054	600	2	600
ICE1	4	0.77325	0.77605	0.999876	15564	1	0.009197	0.029745	0.966054	601	3	601
NonTargetingControl_718	1	0.9908	0.99075	0.999876	19863	0	0.0091971	0.029746	0.966054	602	1	602
MTRNR2L5	4	0.46536	0.58222	0.999876	11668	1	0.009219	0.029809	0.966054	603	3	603
PCDHGA4	4	0.2435	0.37339	0.99918	7506	1	0.0092228	0.029817	0.966054	604	3	604
NOP9	4	0.70032	0.7187	0.999876	14409	1	0.0092288	0.029836	0.966054	605	3	605
TSSK3	4	0.84394	0.84379	0.999876	16934	0	0.0092316	0.029845	0.966054	606	3	606
MORC2	4	0.14743	0.27191	0.99646	5467	2	0.0092363	0.029862	0.966054	607	1	607
LRRK2	4	0.99076	0.9907	0.999876	19862	0	0.0092393	0.029868	0.966054	608	4	608
ZNF131	4	0.76709	0.77071	0.999876	15438	1	0.0092771	0.029985	0.966054	609	3	609
GCC2	4	0.73334	0.74337	0.999876	14891	1	0.0093215	0.030116	0.966054	610	2	610
CCSER2	4	0.99067	0.99063	0.999876	19860	0	0.0093294	0.030141	0.966054	611	4	611
CRP	4	0.60913	0.65907	0.999876	13225	1	0.0093331	0.03015	0.966054	612	3	612
XPO1	4	0.9881	0.98805	0.999876	19803	0	0.0093367	0.030161	0.966054	613	3	613
GPR173	4	0.99066	0.99062	0.999876	19859	0	0.0093372	0.030165	0.966054	614	4	614
RAN	4	0.39978	0.5363	0.999876	10742	1	0.0093395	0.030173	0.966054	615	3	615
OR4B1	4	0.98398	0.98399	0.999876	19723	0	0.0093535	0.030216	0.966054	616	3	616
SRPX	4	0.044891	0.10671	0.982438	2166	1	0.0093855	0.030323	0.966054	617	2	617
CT45A2	2	0.98919	0.98915	0.999876	19822	0	0.0093892	0.030331	0.966054	618	2	618
IGSF3	4	0.9906	0.99056	0.999876	19858	0	0.0094005	0.030363	0.966054	619	4	619
BACH1	4	0.98789	0.98783	0.999876	19798	0	0.009403	0.030372	0.966054	620	4	620
SMIM8	4	0.98294	0.98291	0.999876	19708	0	0.0094055	0.03038	0.966054	621	3	621
EPB41L1	4	0.99057	0.99053	0.999876	19857	0	0.0094272	0.030453	0.966054	622	4	622
C21orf59	4	0.93446	0.93445	0.999876	18755	0	0.0094585	0.030558	0.966054	623	2	623
SH2B3	4	0.99054	0.99049	0.999876	19856	0	0.0094642	0.030569	0.966054	624	4	624
TMEM132D	4	0.3644	0.49928	0.999876	10034	1	0.0094941	0.030661	0.966054	625	1	625
CNKSR2	4	0.27576	0.40725	0.99918	8163	1	0.0095145	0.030724	0.966054	626	3	626
KIAA1549L	4	0.17236	0.29832	0.99646	5997	1	0.0095209	0.030741	0.966054	627	3	627
GFOD1	4	0.82829	0.82812	0.999876	16629	0	0.0095286	0.030765	0.966054	628	3	628
EPOR	4	0.99046	0.99041	0.999876	19855	0	0.0095416	0.030811	0.966054	629	4	629
LEPROTL1	4	0.469	0.58395	0.999876	11708	1	0.0095457	0.030823	0.966054	630	1	630
TTC33	4	0.60386	0.65589	0.999876	13159	1	0.0095673	0.030894	0.966054	631	3	631
ZMYND12	4	0.99043	0.99038	0.999876	19854	0	0.0095741	0.030915	0.966054	632	4	632
QRFP	4	0.99042	0.99037	0.999876	19853	0	0.0095773	0.030926	0.966054	633	4	633
ZDHHC24	4	0.70717	0.72367	0.999876	14510	1	0.0095973	0.030979	0.966054	634	2	634
CIART	4	0.67819	0.70302	0.999876	14105	1	0.0096255	0.031076	0.966054	635	3	635
UGT2B11	4	0.52736	0.61346	0.999876	12304	1	0.0096398	0.031114	0.966054	636	3	636
TBC1D3F	4	0.45187	0.57572	0.999876	11530	1	0.0096488	0.031145	0.966054	637	2	637
VCP	4	0.69707	0.71629	0.999876	14361	1	0.0096592	0.031175	0.966054	638	3	638
SERPINC1	4	0.63851	0.67706	0.999876	13579	1	0.0096613	0.031179	0.966054	639	3	639
YY2	4	0.42025	0.55782	0.999876	11175	1	0.0096731	0.031211	0.966054	640	2	640
TRIM45	4	0.97096	0.97086	0.999876	19474	0	0.0096891	0.031262	0.966054	641	3	641
EXOSC8	4	0.99027	0.99023	0.999876	19850	0	0.0097292	0.031378	0.966054	642	4	642
C16orf78	4	0.10323	0.21342	0.99646	4292	1	0.0097322	0.031394	0.966054	643	3	643
ADAD2	4	0.67557	0.70121	0.999876	14068	1	0.0097519	0.031451	0.966054	644	2	644
RGPD6	4	0.97586	0.97578	0.999876	19563	0	0.009759	0.031471	0.966054	645	2	645
DEFB114	4	0.29447	0.42673	0.99918	8572	1	0.0097687	0.031498	0.966054	646	3	646
ANKLE1	4	0.87897	0.87888	0.999876	17636	0	0.0098034	0.031605	0.966054	647	1	648
ASAH1	4	0.10883	0.22314	0.99646	4485	2	0.0098036	0.031605	0.966054	648	2	647
RNF222	4	0.99018	0.99014	0.999876	19849	0	0.0098172	0.031639	0.966054	649	4	649
CCDC101	4	0.14965	0.2742	0.99646	5515	1	0.0098251	0.031663	0.966054	650	3	650
HGD	4	0.99016	0.99012	0.999876	19848	0	0.0098399	0.031698	0.966054	651	4	651
XAB2	4	0.44558	0.57281	0.999876	11473	1	0.0098453	0.031715	0.966054	652	3	652
GOLGB1	4	0.69393	0.71405	0.999876	14316	1	0.009855	0.03175	0.966054	653	2	653
TFEC	4	0.13917	0.26314	0.99646	5303	2	0.0098811	0.031841	0.966054	654	2	654
HMGN5	4	0.13997	0.26399	0.99646	5318	1	0.0099065	0.031915	0.966054	655	1	655
NPVF	4	0.99007	0.99005	0.999876	19846	0	0.0099261	0.031977	0.966054	656	4	656
TMEM263	4	0.84427	0.84413	0.999876	16940	0	0.0099319	0.031993	0.966054	657	3	657
H2BFM	4	0.99006	0.99003	0.999876	19844	0	0.0099441	0.032031	0.966054	658	4	658
BOD1L2	4	0.25811	0.38872	0.99918	7818	1	0.0099528	0.032052	0.966054	659	2	659
ALS2CR11	4	0.32457	0.45791	0.99918	9199	1	0.0099581	0.032071	0.966054	660	1	660
EPS8L3	4	0.32683	0.4603	0.99918	9248	1	0.0099676	0.032109	0.966054	661	3	661
DHX8	4	0.99003	0.99001	0.999876	19843	0	0.0099678	0.032109	0.966054	662	4	662
GATA6	4	0.99002	0.98999	0.999876	19842	0	0.0099834	0.032158	0.966054	663	4	663
SLAMF7	4	0.49425	0.59644	0.999876	11954	1	0.01001	0.03223	0.966054	664	3	664
PPIL2	4	0.98996	0.98994	0.999876	19841	0	0.010036	0.032315	0.966054	665	4	665
CTNNB1	4	0.80491	0.80499	0.999876	16154	1	0.010037	0.032317	0.966054	666	2	666
NSF	4	0.98995	0.98992	0.999876	19840	0	0.010052	0.032364	0.966054	667	4	667
PHB	4	0.23962	0.36932	0.99918	7420	2	0.010061	0.032393	0.966054	668	1	668
PRMT5	4	0.97533	0.97525	0.999876	19553	0	0.010103	0.032514	0.966054	669	3	669
ZNF764	4	0.72988	0.74069	0.999876	14844	1	0.010113	0.032538	0.966054	670	2	670
SLC25A28	4	0.6393	0.67757	0.999876	13588	1	0.010142	0.032621	0.966054	671	2	671
TAP2	4	0.047522	0.11176	0.982438	2267	1	0.010164	0.03268	0.966054	672	3	672
TOP2B	4	0.45838	0.57889	0.999876	11595	1	0.01023	0.032881	0.966054	673	2	673
KALRN	4	0.98974	0.98972	0.999876	19838	0	0.010258	0.032956	0.966054	674	4	674
KCMF1	4	0.10052	0.20869	0.99646	4193	2	0.010267	0.032986	0.966054	675	1	675
ZNF287	4	0.98973	0.98971	0.999876	19837	0	0.010272	0.033004	0.966054	676	4	676
MCCD1	4	0.98972	0.9897	0.999876	19836	0	0.01028	0.033026	0.966054	677	4	677
AQR	4	0.98969	0.98967	0.999876	19834	0	0.010311	0.033127	0.966054	678	4	678
G0S2	4	0.045844	0.10855	0.982438	2206	3	0.010319	0.033153	0.966054	679	1	679
SF3B1	4	0.98967	0.98966	0.999876	19833	0	0.010327	0.033172	0.966054	680	4	680
CMTM7	4	0.98967	0.98965	0.999876	19832	0	0.010331	0.033182	0.966054	681	4	681
SLAIN2	4	0.85401	0.85386	0.999876	17122	0	0.010367	0.033294	0.966054	682	3	682
PIGG	4	0.41657	0.5539	0.999876	11101	2	0.01037	0.033306	0.966054	683	2	683
RGPD3	4	0.078606	0.16982	0.992253	3437	2	0.010407	0.033415	0.966054	684	2	684
SMIM12	4	0.4958	0.59722	0.999876	11971	1	0.010422	0.033462	0.966054	685	2	685
GTPBP6	4	0.98955	0.98953	0.999876	19831	0	0.010451	0.033552	0.966054	686	4	686
C1orf50	4	0.98952	0.9895	0.999876	19830	0	0.010475	0.033626	0.966054	687	4	687
CCNA2	4	0.95412	0.95396	0.999876	19129	0	0.010492	0.03367	0.966054	688	3	688
UBE2D4	4	0.98088	0.98087	0.999876	19670	0	0.010499	0.033691	0.966054	689	3	689
NonTargetingControl_396	1	0.98949	0.98946	0.999876	19829	0	0.010508	0.033712	0.966054	690	1	690
MARVELD2	4	0.96771	0.96758	0.999876	19400	0	0.010517	0.033737	0.966054	691	3	691
OR1E2	4	0.67123	0.69828	0.999876	14010	1	0.010536	0.033803	0.966054	692	2	692
RAB11FIP2	4	0.94435	0.94423	0.999876	18934	0	0.01056	0.033878	0.966054	693	2	693
TPP1	4	0.98943	0.9894	0.999876	19828	0	0.010566	0.03389	0.966054	694	4	694
EXOSC5	4	0.86671	0.8666	0.999876	17369	0	0.01057	0.033901	0.966054	695	2	695
RIMS4	4	0.055283	0.12653	0.982438	2582	2	0.010576	0.033917	0.966054	696	1	696
WAPAL	4	0.98941	0.98939	0.999876	19827	0	0.010586	0.033951	0.966054	697	4	697
PFDN1	4	0.96976	0.96965	0.999876	19449	0	0.010591	0.033968	0.966054	698	2	698
ENTPD5	4	0.16571	0.29118	0.99646	5867	2	0.010607	0.034024	0.966054	699	2	699
PCED1A	4	0.52638	0.61294	0.999876	12294	1	0.010619	0.034063	0.966054	700	3	700
ABHD12B	4	0.93767	0.93759	0.999876	18815	0	0.010628	0.034089	0.966054	701	2	701
LMBRD2	4	0.96025	0.96011	0.999876	19250	0	0.010653	0.034158	0.966054	702	3	702
KRT82	4	0.8988	0.89867	0.999876	18038	0	0.010697	0.034299	0.966054	703	3	703
PRPF38B	4	0.98923	0.98919	0.999876	19825	0	0.010772	0.03454	0.966054	704	4	704
XDH	4	0.98922	0.98919	0.999876	19824	0	0.010778	0.034564	0.966054	705	4	705
SEPT7	4	0.10365	0.21416	0.99646	4306	3	0.010782	0.034577	0.966054	706	1	706
SPPL2C	4	0.88531	0.88518	0.999876	17763	0	0.010794	0.034608	0.966054	707	3	707
FAM83D	4	0.9892	0.98916	0.999876	19823	0	0.010801	0.03463	0.966054	708	4	708
ALG14	4	0.74266	0.75063	0.999876	15029	1	0.010839	0.03475	0.966054	709	3	709
PWP1	4	0.59661	0.65164	0.999876	13064	1	0.010849	0.034786	0.966054	710	2	710
FZD5	4	0.98915	0.98911	0.999876	19821	0	0.01085	0.034789	0.966054	711	4	711
PEX13	4	0.26479	0.3957	0.99918	7954	1	0.010858	0.034815	0.966054	712	3	712
MGAT2	4	0.94705	0.9469	0.999876	18991	0	0.010877	0.034874	0.966054	713	3	713
RCOR2	4	0.11333	0.23102	0.99646	4640	1	0.010879	0.034884	0.966054	714	3	714
DDX19A	4	0.92912	0.92905	0.999876	18639	0	0.010885	0.034901	0.966054	715	2	715
PRPF19	4	0.27396	0.4053	0.99918	8131	1	0.010914	0.034982	0.966054	716	3	716
NKG7	4	0.87131	0.87119	0.999876	17478	0	0.010917	0.034992	0.966054	717	3	717
DDHD1	4	0.33387	0.46756	0.99918	9387	2	0.010937	0.035047	0.966054	718	1	718
MIR205HG	4	0.83631	0.83612	0.999876	16782	0	0.010961	0.03512	0.966054	719	2	719
GBP3	4	0.022014	0.060769	0.97945	1244	1	0.010983	0.035184	0.966054	720	3	720
CACYBP	4	0.86598	0.86589	0.999876	17354	0	0.01099	0.035207	0.966054	721	3	721
GCK	4	0.92155	0.92142	0.999876	18491	0	0.011002	0.035242	0.966054	722	3	722
TEX13A	4	0.98899	0.98896	0.999876	19820	0	0.01101	0.03527	0.966054	723	4	723
ARFGAP2	4	0.98899	0.98895	0.999876	19819	0	0.011012	0.035276	0.966054	724	4	724
C14orf178	4	0.93819	0.93812	0.999876	18826	0	0.011021	0.0353	0.966054	725	3	725
SRP14	4	0.98897	0.98893	0.999876	19818	0	0.011031	0.035336	0.966054	726	4	726
FAM92A1	4	0.72268	0.73524	0.999876	14741	1	0.01104	0.035371	0.966054	727	2	727
FNBP1L	4	0.90859	0.90841	0.999876	18224	0	0.011043	0.035381	0.966054	729	2	728
SNRPD2	4	0.98716	0.98713	0.999876	19780	0	0.011043	0.035381	0.966054	728	4	729
TCEAL2	4	0.15739	0.28234	0.99646	5686	1	0.011059	0.035432	0.966054	730	2	730
DTX2	4	0.98892	0.98888	0.999876	19817	0	0.01108	0.035484	0.966054	731	4	731
ATP8B3	4	0.58827	0.64683	0.999876	12972	1	0.01109	0.035523	0.966054	732	2	732
AOC1	4	0.93226	0.9322	0.999876	18716	0	0.011091	0.035527	0.966054	733	1	733
PCDHB7	4	0.92878	0.92872	0.999876	18627	0	0.011092	0.035533	0.966054	734	3	734
BAMBI	4	0.25795	0.38855	0.99918	7816	2	0.011143	0.035687	0.966054	735	1	735
KCNJ5	4	0.89026	0.89018	0.999876	17844	0	0.011156	0.03572	0.966054	736	2	736
SF3B6	4	0.98883	0.98878	0.999876	19816	0	0.011175	0.035777	0.966054	737	4	737
RNMT	4	0.72035	0.73347	0.999876	14703	1	0.011188	0.035822	0.966054	738	2	738
LYVE1	4	0.78241	0.78419	0.999876	15727	1	0.011194	0.035835	0.966054	739	2	739
DNAH14	4	0.9888	0.98876	0.999876	19815	0	0.011195	0.035837	0.966054	740	4	740
ASH2L	4	0.80536	0.80544	0.999876	16164	1	0.011246	0.035981	0.966054	741	2	741
ERICH6B	4	0.56267	0.63243	0.999876	12670	1	0.011248	0.03599	0.966054	742	3	742
SLC38A9	4	0.24251	0.37233	0.99918	7485	2	0.011254	0.036007	0.966054	743	2	743
DIRC2	4	0.98658	0.98657	0.999876	19764	0	0.011301	0.036154	0.966054	744	4	744
IQCF1	4	0.11008	0.22528	0.99646	4523	2	0.011349	0.036314	0.966054	745	2	745
OSGEPL1	4	0.87025	0.87015	0.999876	17460	0	0.011366	0.036366	0.966054	746	2	746
INPPL1	4	0.98861	0.98857	0.999876	19813	0	0.011388	0.036425	0.966054	747	4	747
SAT2	4	0.41268	0.54981	0.999876	11026	2	0.0114	0.036458	0.966054	748	2	748
CCIN	4	0.28378	0.4155	0.99918	8344	2	0.011452	0.036628	0.966054	749	2	749
CNOT7	4	0.35818	0.49283	0.999876	9911	2	0.011478	0.036704	0.966054	750	2	750
DAAM1	4	0.0045357	0.015233	0.942548	319	1	0.011481	0.036713	0.966054	751	3	751
TTI1	4	0.95935	0.95916	0.999876	19232	0	0.011495	0.036753	0.966054	752	3	752
RHO	4	0.64665	0.68224	0.999876	13671	1	0.011503	0.036771	0.966054	753	3	753
HADH	4	0.94256	0.94244	0.999876	18899	0	0.011503	0.036774	0.966054	754	3	754
CAPZB	4	0.7681	0.7716	0.999876	15455	1	0.011522	0.036827	0.966054	755	2	755
SSTR1	4	0.16812	0.29378	0.99646	5918	1	0.011532	0.036851	0.966054	756	2	756
DEFB4A	4	0.77063	0.77374	0.999876	15506	1	0.011542	0.036884	0.966054	757	2	757
CCNG2	4	0.49456	0.59662	0.999876	11960	1	0.011555	0.036921	0.966054	758	1	758
ZNF461	4	0.8983	0.89815	0.999876	18027	0	0.011559	0.036935	0.966054	759	3	759
CYLC2	4	0.9884	0.98835	0.999876	19811	0	0.011595	0.037057	0.966054	760	4	760
TWISTNB	4	0.97879	0.9787	0.999876	19633	0	0.011599	0.037066	0.966054	761	3	761
AGPS	4	0.98837	0.98831	0.999876	19810	0	0.011626	0.037147	0.966054	762	4	762
RAVER2	4	0.98322	0.98319	0.999876	19711	0	0.011638	0.037176	0.966054	763	3	763
CDK9	4	0.44089	0.57062	0.999876	11431	1	0.011674	0.037278	0.966054	764	2	764
SOX4	4	0.9883	0.98824	0.999876	19808	0	0.0117	0.037353	0.966054	765	4	765
RTFDC1	4	0.94415	0.94402	0.999876	18931	0	0.011709	0.037382	0.966054	766	3	766
GLIS2	4	0.30575	0.4384	0.99918	8807	1	0.011725	0.03742	0.966054	767	3	767
SUPT3H	4	0.98827	0.98821	0.999876	19806	0	0.011726	0.037423	0.966054	768	4	768
CA8	4	0.98825	0.98819	0.999876	19805	0	0.01175	0.037495	0.966054	769	4	769
NSUN6	4	0.92726	0.9272	0.999876	18597	0	0.01176	0.037519	0.966054	770	3	770
QPCTL	4	0.074182	0.1617	0.992151	3268	3	0.011761	0.03752	0.966054	771	1	771
SF3A2	4	0.98822	0.98816	0.999876	19804	0	0.011779	0.037577	0.966054	772	4	772
NEDD4	4	0.069679	0.15344	0.992034	3105	1	0.011785	0.037601	0.966054	773	3	773
SAMD14	4	0.26753	0.39855	0.99918	8007	1	0.011857	0.037816	0.966054	774	3	774
NUDT14	4	0.31305	0.44589	0.99918	8955	2	0.011915	0.037985	0.966054	775	1	775
AUP1	4	0.98806	0.98801	0.999876	19801	0	0.011941	0.038061	0.966054	776	4	776
FAM98B	4	0.93507	0.93505	0.999876	18773	0	0.01195	0.038082	0.966054	777	3	777
PXK	4	0.98804	0.98798	0.999876	19800	0	0.011965	0.038128	0.966054	778	4	778
PROX1	4	0.59668	0.65169	0.999876	13065	1	0.011966	0.038131	0.966054	779	2	779
KRT15	4	0.85868	0.85858	0.999876	17214	0	0.011985	0.038184	0.966054	780	3	780
MRAP	4	0.94859	0.94845	0.999876	19017	0	0.011988	0.038192	0.966054	781	3	781
ATP5E	4	0.66113	0.69158	0.999876	13873	1	0.012003	0.03824	0.966054	782	3	782
SUGP2	4	0.94579	0.9456	0.999876	18961	0	0.012035	0.038321	0.966054	783	2	783
GATSL3	4	0.98794	0.98787	0.999876	19799	0	0.012064	0.038406	0.966054	784	4	784
OTOS	4	0.95845	0.95826	0.999876	19218	0	0.012081	0.038455	0.966054	785	3	785
GZMM	4	0.33191	0.46557	0.99918	9344	1	0.012099	0.038507	0.966054	786	3	786
TRPV3	4	0.89608	0.89595	0.999876	17980	0	0.012121	0.038574	0.966054	787	3	787
C12orf49	4	0.98785	0.98779	0.999876	19796	0	0.012155	0.038669	0.966054	788	4	788
ITPKB	4	0.98784	0.98779	0.999876	19795	0	0.012158	0.03868	0.966054	789	4	789
KLHDC4	4	0.48294	0.59083	0.999876	11855	1	0.012172	0.038723	0.966054	790	2	790
TMEM239	4	0.98783	0.98777	0.999876	19794	0	0.012174	0.038724	0.966054	791	4	791
FOXO4	4	0.89687	0.89672	0.999876	17999	0	0.012199	0.038799	0.966054	792	2	792
GFM2	4	0.64976	0.68424	0.999876	13719	1	0.012224	0.038872	0.966054	793	3	793
GSS	4	0.46591	0.58248	0.999876	11674	1	0.012238	0.038908	0.966054	794	3	794
RARRES3	4	0.98774	0.98769	0.999876	19793	0	0.012258	0.03896	0.966054	795	4	795
TBC1D10B	4	0.072444	0.15856	0.992151	3205	2	0.012275	0.03901	0.966054	796	1	796
AGTRAP	4	0.80026	0.80052	0.999876	16065	1	0.012276	0.039014	0.966054	797	3	797
OR2T35	4	0.60729	0.65799	0.999876	13201	1	0.012291	0.039056	0.966054	798	2	798
CAMK2G	4	0.23076	0.35999	0.999165	7245	1	0.012327	0.039166	0.966054	799	1	799
SCAF11	4	0.93357	0.93353	0.999876	18737	0	0.012328	0.03917	0.966054	800	3	800
ARG2	4	0.63173	0.6728	0.999876	13480	1	0.012331	0.039178	0.966054	801	3	801
NDUFS1	4	0.98765	0.98761	0.999876	19792	0	0.012345	0.039225	0.966054	802	4	802
ZNF548	4	0.98765	0.9876	0.999876	19791	0	0.012348	0.039234	0.966054	803	4	803
GSPT1	4	0.31842	0.45148	0.99918	9071	2	0.012378	0.039322	0.966054	804	2	804
PARP9	4	0.98757	0.98752	0.999876	19790	0	0.012435	0.039486	0.966054	805	4	805
TXNDC12	4	0.76004	0.76479	0.999876	15324	1	0.01244	0.039501	0.966054	806	3	806
PTGES2	4	0.98755	0.98751	0.999876	19789	0	0.012445	0.03952	0.966054	807	4	807
TMED10	4	0.92298	0.92283	0.999876	18516	0	0.012481	0.03963	0.966054	808	3	808
CAPS	4	0.98747	0.98742	0.999876	19788	0	0.012533	0.039786	0.966054	809	4	809
NonTargetingControl_633	1	0.98745	0.9874	0.999876	19787	0	0.012546	0.039824	0.966054	810	1	810
ZNF600	4	0.28378	0.4155	0.99918	8342	2	0.01255	0.039836	0.966054	811	2	811
TTC37	4	0.12191	0.24478	0.99646	4926	2	0.012558	0.039862	0.966054	812	2	812
RAB3IP	4	0.97616	0.97608	0.999876	19574	0	0.012558	0.039862	0.966054	813	3	813
GSTM5	4	0.12452	0.24754	0.99646	4989	1	0.01256	0.039866	0.966054	814	3	814
SOD1	4	0.98582	0.98581	0.999876	19756	0	0.01258	0.039934	0.966054	815	4	815
HEBP2	4	0.74449	0.7521	0.999876	15056	1	0.012593	0.039977	0.966054	816	3	816
HRH2	4	0.59602	0.65132	0.999876	13058	1	0.012635	0.040096	0.966054	818	2	817
OR8I2	4	0.98736	0.98731	0.999876	19786	0	0.012635	0.040096	0.966054	817	4	818
TMEM151A	4	0.69489	0.71471	0.999876	14328	1	0.012664	0.040175	0.966054	819	3	819
GJA9	4	0.96662	0.96654	0.999876	19374	0	0.012667	0.040184	0.966054	820	3	820
TAF1D	4	0.98733	0.98728	0.999876	19785	0	0.012673	0.040201	0.966054	821	4	821
MIS18A	4	0.98732	0.98727	0.999876	19784	0	0.012679	0.040218	0.966054	822	4	822
UBE2S	4	0.83623	0.83603	0.999876	16781	0	0.012687	0.040244	0.966054	823	3	823
NMNAT2	4	0.98731	0.98727	0.999876	19782	0	0.012687	0.040245	0.966054	824	4	824
BST2	4	0.61951	0.66527	0.999876	13337	1	0.012697	0.040267	0.966054	825	3	825
OR52E4	4	0.69211	0.71276	0.999876	14288	1	0.012738	0.040391	0.966054	826	3	826
TREX1	4	0.98726	0.98721	0.999876	19781	0	0.012743	0.040407	0.966054	827	4	827
DBN1	4	0.36685	0.50186	0.999876	10082	1	0.012756	0.040444	0.966054	828	3	828
FFAR4	4	0.10307	0.21315	0.99646	4284	2	0.01279	0.040543	0.966054	829	1	829
HIST1H2BL	4	0.98709	0.98706	0.999876	19777	0	0.012794	0.040562	0.966054	830	4	830
ST3GAL5	4	0.81279	0.8127	0.999876	16321	1	0.012809	0.040607	0.966054	831	3	831
DPH6	4	0.66321	0.69295	0.999876	13892	1	0.012819	0.040645	0.966054	832	2	832
ADSL	4	0.34838	0.48271	0.99918	9709	2	0.012841	0.040718	0.966054	833	1	833
ACAD11	4	0.81564	0.81559	0.999876	16376	0	0.012849	0.040741	0.966054	834	2	834
LILRB5	4	0.98715	0.98712	0.999876	19779	0	0.012854	0.040759	0.966054	835	4	835
TMEM74	4	0.92636	0.92625	0.999876	18574	0	0.012861	0.040778	0.966054	836	3	836
FFAR2	4	0.98712	0.9871	0.999876	19778	0	0.012875	0.040815	0.966054	837	4	837
ADAMTS9	4	0.024615	0.066239	0.982438	1351	1	0.012885	0.040846	0.966054	838	3	838
ATP13A3	4	0.39356	0.52972	0.999876	10621	2	0.012892	0.040872	0.966054	839	2	839
HDDC2	4	0.067785	0.1499	0.991047	3037	3	0.012944	0.041029	0.966054	840	1	840
RNF5	4	0.85113	0.851	0.999876	17074	0	0.013001	0.041193	0.966054	841	2	841
CTDSP1	4	0.987	0.98697	0.999876	19776	0	0.013003	0.041197	0.966054	842	4	842
CPSF4	4	0.34389	0.47796	0.99918	9588	2	0.013015	0.041235	0.966054	843	2	843
ZNF521	4	0.21771	0.34625	0.997888	6968	1	0.013029	0.041273	0.966054	844	2	844
RPS12	4	0.88125	0.88116	0.999876	17679	0	0.013039	0.041303	0.966054	845	2	845
ZNF671	4	0.94019	0.94011	0.999876	18861	0	0.013049	0.041332	0.966054	846	2	846
DIP2A	4	0.98695	0.98692	0.999876	19775	0	0.013051	0.041337	0.966054	847	4	847
BLCAP	4	0.87635	0.87627	0.999876	17578	0	0.013097	0.041464	0.966054	848	3	848
HILPDA	4	0.88245	0.88238	0.999876	17701	0	0.013098	0.041467	0.966054	849	2	849
UHMK1	4	0.39902	0.53549	0.999876	10727	1	0.013101	0.041478	0.966054	850	3	850
FBXO24	4	0.98687	0.98685	0.999876	19774	0	0.013129	0.041569	0.966054	851	4	851
OR8J1	4	0.091703	0.19315	0.99646	3893	3	0.013149	0.04163	0.966054	852	1	852
EMG1	4	0.89817	0.89803	0.999876	18026	0	0.013199	0.041784	0.966054	853	3	853
PIK3CB	4	0.88366	0.88359	0.999876	17724	0	0.013237	0.041891	0.966054	854	3	854
FAM221A	4	0.98675	0.98674	0.999876	19772	0	0.013246	0.041923	0.966054	855	4	855
GRIA4	4	0.15929	0.28436	0.99646	5735	2	0.013252	0.041939	0.966054	856	1	856
RTEL1	4	0.98674	0.98672	0.999876	19771	0	0.013263	0.041974	0.966054	857	4	857
APEX2	4	0.88055	0.88044	0.999876	17663	0	0.013278	0.042017	0.966054	858	3	858
DEF8	4	0.69692	0.71617	0.999876	14359	1	0.013288	0.04205	0.966054	859	3	859
IK	4	0.9867	0.98668	0.999876	19770	0	0.013298	0.042083	0.966054	860	4	860
DCST1	4	0.13078	0.25425	0.99646	5126	1	0.01332	0.042149	0.966054	861	3	861
MILR1	4	0.98668	0.98665	0.999876	19769	0	0.013324	0.042159	0.966054	862	4	862
SBNO2	4	0.98665	0.98663	0.999876	19767	0	0.013353	0.042253	0.966054	863	4	863
SUPT20H	4	0.36125	0.49602	0.999876	9962	1	0.013355	0.042256	0.966054	864	2	864
CCT7	4	0.98664	0.98662	0.999876	19766	0	0.013359	0.042267	0.966054	865	4	865
STK32C	4	0.2906	0.42267	0.99918	8488	1	0.013367	0.042283	0.966054	866	2	866
CD5L	4	0.91884	0.91866	0.999876	18437	0	0.01338	0.042322	0.966054	867	3	867
EIF2A	4	0.17894	0.30525	0.99646	6155	2	0.013406	0.042395	0.966054	868	2	868
ARFGAP3	4	0.98659	0.98657	0.999876	19765	0	0.013413	0.04241	0.966054	869	4	869
ERICH6	4	0.95314	0.953	0.999876	19105	0	0.013432	0.04248	0.966054	870	3	870
UCN	4	0.27282	0.40409	0.99918	8105	2	0.013458	0.042539	0.966054	871	2	871
CRB1	4	0.9612	0.96111	0.999876	19267	0	0.01346	0.042548	0.966054	872	2	872
ETF1	4	0.9865	0.98649	0.999876	19763	0	0.013496	0.042654	0.966054	873	4	873
ASCL3	4	0.98157	0.98155	0.999876	19682	0	0.013509	0.04269	0.966054	874	3	874
TMEM194A	4	0.20743	0.33533	0.997888	6754	1	0.013561	0.042835	0.966054	875	1	875
RTCB	4	0.94521	0.94504	0.999876	18951	0	0.013562	0.042838	0.966054	876	3	876
NonTargetingControl_729	1	0.98643	0.98641	0.999876	19762	0	0.013572	0.042871	0.966054	877	1	877
RPL3L	4	0.98641	0.98639	0.999876	19761	0	0.013592	0.042924	0.966054	878	4	878
DIRAS2	4	0.88858	0.88844	0.999876	17821	0	0.013598	0.042942	0.966054	879	2	879
CCDC159	4	0.36425	0.49913	0.999876	10030	1	0.013647	0.043063	0.966054	880	3	880
ARHGAP18	4	0.98635	0.98632	0.999876	19760	0	0.013654	0.043081	0.966054	881	4	881
FSTL5	4	0.15622	0.28107	0.99646	5666	2	0.013663	0.043112	0.966054	882	2	882
CYP51A1	4	0.57953	0.64183	0.999876	12868	1	0.013676	0.043152	0.966054	883	3	883
PNRC2	4	0.36338	0.49823	0.999876	10010	2	0.013685	0.043178	0.966054	884	2	884
DOCK6	4	0.98631	0.98628	0.999876	19759	0	0.013693	0.043202	0.966054	885	4	885
GATB	4	0.68622	0.70862	0.999876	14216	1	0.013715	0.043266	0.966054	886	1	886
TLE2	4	0.98626	0.98623	0.999876	19758	0	0.01374	0.043341	0.966054	887	4	887
DNAAF3	4	0.84032	0.84013	0.999876	16863	0	0.013759	0.043404	0.966054	888	3	888
TUBB8	4	0.57202	0.63766	0.999876	12790	1	0.013765	0.043415	0.966054	889	2	889
FOXJ1	4	0.87703	0.87693	0.999876	17593	0	0.013782	0.043462	0.966054	890	2	890
CTDSP2	4	0.75199	0.75819	0.999876	15186	1	0.013798	0.043511	0.966054	891	3	891
ETV1	4	0.75712	0.76235	0.999876	15282	1	0.013818	0.043563	0.966054	892	2	892
LOC391003	4	0.96522	0.96511	0.999876	19348	0	0.013824	0.043581	0.966054	893	2	893
HPR	4	0.47845	0.58859	0.999876	11814	1	0.013852	0.043661	0.966054	894	2	894
CCZ1B	4	0.098746	0.20563	0.99646	4131	2	0.013869	0.043706	0.966054	895	2	895
RNF17	4	0.25036	0.38066	0.99918	7652	2	0.013887	0.043749	0.966054	896	2	896
ATPAF1	4	0.32782	0.46132	0.99918	9269	1	0.013893	0.043762	0.966054	897	3	897
OIP5	4	0.93957	0.93947	0.999876	18854	0	0.013893	0.043762	0.966054	898	3	898
UBL3	4	0.55641	0.62897	0.999876	12591	1	0.013912	0.043815	0.966054	899	2	899
EDNRA	4	0.22567	0.35461	0.997888	7132	2	0.01392	0.043841	0.966054	900	2	900
NOS3	4	0.12537	0.24843	0.99646	5004	1	0.013953	0.043929	0.966054	901	3	901
ATP6AP1L	4	0.30924	0.44194	0.99918	8877	1	0.013961	0.043951	0.966054	902	3	902
POTEB	4	0.90114	0.90097	0.999876	18080	0	0.013972	0.043982	0.966054	903	2	903
ZNF585A	4	0.091375	0.19257	0.99646	3878	1	0.014023	0.04412	0.966054	904	3	904
MLLT10	4	0.41267	0.5498	0.999876	11025	1	0.014049	0.0442	0.966054	905	2	905
TMPRSS12	4	0.39641	0.53272	0.999876	10678	1	0.014073	0.044263	0.966054	906	2	906
FAN1	4	0.93708	0.93702	0.999876	18800	0	0.014075	0.044267	0.966054	907	3	907
SLCO6A1	4	0.78788	0.78903	0.999876	15838	1	0.014092	0.044315	0.966054	908	3	908
NBPF14	4	0.97163	0.97153	0.999876	19481	0	0.014094	0.044323	0.966054	909	3	909
CARD10	4	0.53227	0.61602	0.999876	12362	1	0.01411	0.044364	0.966054	910	3	910
RALYL	4	0.83422	0.83405	0.999876	16733	0	0.014126	0.044414	0.966054	911	1	911
SPATA31E1	4	0.81813	0.81806	0.999876	16427	0	0.014128	0.04442	0.966054	912	3	912
PSMD6	4	0.7331	0.74319	0.999876	14886	1	0.014141	0.044459	0.966054	913	3	913
ANKRD31	4	0.3212	0.45437	0.99918	9130	1	0.014177	0.044555	0.966054	914	1	914
HSD17B7	4	0.95073	0.95057	0.999876	19059	0	0.014179	0.04456	0.966054	915	2	915
IL12RB1	4	0.9858	0.98579	0.999876	19755	0	0.014203	0.044625	0.966054	916	4	916
KCNQ1	4	0.21852	0.34707	0.997888	6982	2	0.014229	0.044704	0.966054	917	1	917
EEF1E1	4	0.95857	0.95837	0.999876	19219	0	0.014372	0.045106	0.966054	918	3	918
SCT	4	0.48898	0.59384	0.999876	11920	1	0.014383	0.045141	0.966054	919	1	919
KEAP1	4	0.33729	0.47109	0.99918	9448	1	0.014406	0.045214	0.966054	920	3	920
LONP1	4	0.95951	0.95932	0.999876	19235	0	0.014431	0.045283	0.966054	921	3	921
TLK2	4	0.98557	0.98557	0.999876	19754	0	0.014432	0.045283	0.966054	922	4	922
LMCD1	4	0.33178	0.46543	0.99918	9342	2	0.014434	0.045289	0.966054	923	2	923
ZNF559-ZNF177	4	0.98555	0.98556	0.999876	19753	0	0.014447	0.045331	0.966054	924	4	924
CASP10	4	0.96611	0.96602	0.999876	19361	0	0.014449	0.045339	0.966054	925	3	925
ZMAT4	4	0.98553	0.98553	0.999876	19752	0	0.01447	0.045394	0.966054	926	4	926
GALNT5	4	0.98068	0.98067	0.999876	19667	0	0.014481	0.045424	0.966054	927	3	927
ILDR2	4	0.5122	0.60561	0.999876	12142	1	0.014485	0.045434	0.966054	928	2	928
WEE1	4	0.83623	0.83603	0.999876	16780	0	0.014517	0.04553	0.966054	929	2	929
CCDC73	4	0.20356	0.33124	0.997888	6663	1	0.014533	0.045587	0.966054	930	3	930
SSX7	4	0.89981	0.89964	0.999876	18062	0	0.014534	0.04559	0.966054	931	3	931
DMGDH	4	0.72705	0.73854	0.999876	14803	1	0.014537	0.045597	0.966054	932	1	932
SNAPC4	4	0.80966	0.80959	0.999876	16253	1	0.014563	0.045683	0.966054	933	2	933
IDE	4	0.17322	0.29926	0.99646	6020	2	0.014613	0.045837	0.966054	934	2	934
ST20	4	0.88822	0.88807	0.999876	17814	0	0.01464	0.045918	0.966054	935	3	935
CHMP5	4	0.40913	0.54605	0.999876	10948	1	0.014655	0.045961	0.966054	936	3	936
METAP2	4	0.98533	0.98534	0.999876	19750	0	0.014673	0.046015	0.966054	937	4	937
POLDIP2	4	0.98532	0.98533	0.999876	19748	0	0.014682	0.046041	0.966054	939	4	938
TNFSF11	4	0.98532	0.98533	0.999876	19749	0	0.014682	0.046041	0.966054	938	4	939
POM121L2	4	0.59055	0.64812	0.999876	12993	1	0.014685	0.046047	0.966054	940	2	940
GON4L	4	0.027008	0.071213	0.982438	1451	2	0.014691	0.046065	0.966054	941	1	941
LNPEP	4	0.98528	0.98529	0.999876	19747	0	0.014715	0.046124	0.966054	942	4	942
NLRP4	4	0.51196	0.60547	0.999876	12138	1	0.014717	0.046132	0.966054	943	2	943
CCDC53	4	0.98526	0.98527	0.999876	19746	0	0.014745	0.046206	0.966054	944	3	944
GPN3	4	0.98523	0.98525	0.999876	19745	0	0.014767	0.046262	0.966054	945	3	945
LSM3	4	0.98095	0.98094	0.999876	19671	0	0.014774	0.04628	0.966054	946	3	946
NCOA3	4	0.91236	0.91218	0.999876	18299	0	0.014789	0.04632	0.966054	947	3	947
DNTTIP1	4	0.92943	0.92938	0.999876	18647	0	0.014835	0.046453	0.966054	948	3	948
ANKS3	4	0.095418	0.19966	0.99646	4010	3	0.014845	0.046477	0.966054	949	1	949
GREB1L	4	0.93373	0.93369	0.999876	18744	0	0.014859	0.04652	0.966054	950	3	950
AASDH	4	0.82512	0.82502	0.999876	16563	0	0.014866	0.046537	0.966054	951	3	951
AQP2	4	0.1422	0.26635	0.99646	5358	1	0.014896	0.046629	0.966054	952	1	952
CCDC74A	4	0.98509	0.98511	0.999876	19744	0	0.01491	0.046672	0.966054	953	4	953
OR2B6	4	0.96083	0.96072	0.999876	19260	0	0.014912	0.046677	0.966054	954	3	954
HIST2H3D	4	0.82505	0.82496	0.999876	16560	0	0.014931	0.046725	0.966054	955	2	955
KDM4B	4	0.90743	0.90722	0.999876	18205	0	0.014948	0.046776	0.966054	956	2	956
FKTN	4	0.23202	0.36133	0.99918	7265	1	0.014966	0.046831	0.966054	957	2	957
SLBP	4	0.98502	0.98503	0.999876	19743	0	0.014985	0.046873	0.966054	958	4	958
FLT3	4	0.88809	0.88796	0.999876	17812	0	0.015015	0.046949	0.966054	959	3	959
KRTAP10-1	4	0.24873	0.3789	0.99918	7618	2	0.015017	0.046957	0.966054	960	2	960
ICE2	4	0.56122	0.63163	0.999876	12646	1	0.015068	0.047109	0.966054	961	2	961
LRRC18	4	0.76286	0.76714	0.999876	15370	1	0.015082	0.047148	0.966054	962	3	962
RGS19	4	0.41606	0.55336	0.999876	11094	1	0.015102	0.047209	0.966054	963	2	963
RPS6KA6	4	0.98489	0.9849	0.999876	19742	0	0.015112	0.047233	0.966054	964	4	964
WDR11	4	0.98487	0.98488	0.999876	19740	0	0.015132	0.047295	0.966054	965	4	965
DOPEY1	4	0.98487	0.98488	0.999876	19741	0	0.015132	0.047295	0.966054	966	4	966
TUBA4A	4	0.97746	0.97735	0.999876	19601	0	0.015166	0.047397	0.966054	967	3	967
MRPL53	4	0.98242	0.98238	0.999876	19696	0	0.01517	0.047409	0.966054	968	3	968
OOSP2	4	0.39433	0.53051	0.999876	10636	1	0.015184	0.047447	0.966054	969	3	969
NDFIP1	4	0.91421	0.91401	0.999876	18338	0	0.015214	0.047536	0.966054	970	2	970
DUX4	4	0.31213	0.44493	0.99918	8938	2	0.01523	0.047582	0.966054	972	1	971
ATAD1	4	0.97691	0.9768	0.999876	19588	0	0.01523	0.047582	0.966054	971	3	972
LEFTY1	4	0.67924	0.70381	0.999876	14119	1	0.015248	0.047638	0.966054	973	3	973
PUS1	4	0.37055	0.50573	0.999876	10144	1	0.015265	0.04768	0.966054	974	3	974
FAM199X	4	0.3968	0.53314	0.999876	10681	1	0.015269	0.047693	0.966054	975	3	975
RNH1	4	0.79559	0.79615	0.999876	15985	1	0.015274	0.047711	0.966054	976	3	976
NPBWR1	4	0.97168	0.97159	0.999876	19483	0	0.015288	0.04775	0.966054	977	3	977
PCYT1A	4	0.87759	0.87745	0.999876	17609	0	0.015298	0.047779	0.966054	978	3	978
C14orf132	4	0.38117	0.51676	0.999876	10375	2	0.015307	0.047808	0.966054	979	1	979
STPG2	4	0.58382	0.64425	0.999876	12919	1	0.015323	0.047852	0.966054	980	2	980
CHRM1	4	0.98468	0.98468	0.999876	19739	0	0.015324	0.047854	0.966054	981	4	981
CFAP53	4	0.98466	0.98467	0.999876	19738	0	0.015336	0.047879	0.966054	982	4	982
RS1	4	0.98466	0.98467	0.999876	19737	0	0.015344	0.047903	0.966054	983	4	983
PPP3CB	4	0.92703	0.92695	0.999876	18591	0	0.015358	0.047946	0.966054	984	2	984
LMO4	4	0.9846	0.98461	0.999876	19736	0	0.0154	0.048078	0.966054	985	4	985
NBPF20	4	0.21455	0.34289	0.997888	6901	2	0.01541	0.048102	0.966054	986	2	986
BRF1	4	0.88984	0.88977	0.999876	17836	0	0.015413	0.048113	0.966054	987	3	987
SPDYE2B	4	0.98456	0.98457	0.999876	19735	0	0.015439	0.048191	0.966054	988	4	988
PEA15	4	0.96483	0.96472	0.999876	19337	0	0.015461	0.048249	0.966054	989	3	989
DENR	4	0.90017	0.90002	0.999876	18067	0	0.015488	0.048319	0.966054	990	3	990
G6PD	4	0.81219	0.81209	0.999876	16307	1	0.015512	0.048373	0.966054	991	1	991
UPP2	4	0.91916	0.91897	0.999876	18445	0	0.015564	0.048485	0.966054	992	2	992
GDPD3	4	0.17213	0.29808	0.99646	5990	1	0.015576	0.048509	0.966054	993	3	993
SYF2	4	0.98441	0.98444	0.999876	19731	0	0.015588	0.048532	0.966054	994	3	994
TMEM56-RWDD3	4	0.52607	0.61278	0.999876	12288	1	0.015608	0.04858	0.966054	995	3	995
REEP3	4	0.79781	0.79823	0.999876	16028	1	0.015615	0.048592	0.966054	996	2	996
PSMA4	4	0.96713	0.96702	0.999876	19389	0	0.015625	0.048615	0.966054	997	3	997
OR10A3	4	0.27126	0.40243	0.99918	8073	1	0.015636	0.048641	0.966054	998	2	998
SLC24A4	4	0.9012	0.90104	0.999876	18082	0	0.015661	0.048689	0.966054	999	3	999
SLC25A53	4	0.44584	0.57294	0.999876	11476	1	0.015662	0.04869	0.966054	1000	2	1000
ARHGEF17	4	0.56384	0.63308	0.999876	12686	1	0.01567	0.048708	0.966054	1001	1	1001
DRICH1	4	0.39887	0.53533	0.999876	10723	2	0.015684	0.048737	0.966054	1002	2	1002
GOLGA8K	4	0.40335	0.54001	0.999876	10817	2	0.015714	0.048801	0.966054	1003	2	1003
COA6	4	0.34775	0.48208	0.99918	9689	1	0.015717	0.048807	0.966054	1004	3	1004
MARK1	4	0.35183	0.48625	0.999404	9770	1	0.015719	0.048814	0.966054	1005	3	1005
TRMT61A	4	0.57824	0.6411	0.999876	12850	1	0.015742	0.048854	0.966054	1006	3	1006
AQP7	4	0.79642	0.79692	0.999876	15998	1	0.015743	0.048856	0.966054	1007	3	1007
LOC441155	4	0.46566	0.58236	0.999876	11672	1	0.015769	0.048911	0.966054	1008	2	1008
ASMTL	4	0.28817	0.42014	0.99918	8440	2	0.015773	0.048922	0.966054	1009	2	1009
FRS3	4	0.0058938	0.019529	0.967673	405	2	0.01582	0.049022	0.966054	1010	2	1010
ZNF282	4	0.27724	0.40877	0.99918	8189	1	0.015824	0.049033	0.966054	1011	2	1011
STAC3	4	0.77846	0.78063	0.999876	15657	1	0.015832	0.049051	0.966054	1012	2	1012
INTS7	4	0.81316	0.81307	0.999876	16330	1	0.015832	0.049051	0.966054	1013	2	1014
ARHGEF40	4	0.79685	0.79733	0.999876	16008	1	0.015833	0.049051	0.966054	1014	3	1013
FCGRT	4	0.75477	0.76044	0.999876	15231	1	0.015871	0.049133	0.966054	1015	3	1015
NonTargetingControl_270	1	0.98412	0.98415	0.999876	19726	0	0.015882	0.04916	0.966054	1016	1	1016
TMEM56	4	0.066922	0.14833	0.991047	3002	1	0.015923	0.049246	0.966054	1017	2	1017
KRTCAP2	4	0.33664	0.47041	0.99918	9436	1	0.015929	0.04926	0.966054	1018	3	1018
KISS1	4	0.96368	0.96358	0.999876	19317	0	0.015948	0.049298	0.966054	1019	3	1019
P4HB	4	0.86802	0.86795	0.999876	17405	0	0.015974	0.049362	0.966054	1020	3	1020
DRC7	4	0.60524	0.65675	0.999876	13179	1	0.015986	0.049386	0.966054	1021	3	1021
SEPP1	4	0.26968	0.40079	0.99918	8046	2	0.016025	0.049461	0.966054	1022	1	1022
SLC35G1	4	0.47436	0.58661	0.999876	11771	1	0.016041	0.049486	0.966054	1023	2	1023
C10orf76	4	0.73584	0.74531	0.999876	14930	1	0.016041	0.049486	0.966054	1024	3	1024
GOLGA6L6	4	0.97674	0.97663	0.999876	19585	0	0.016092	0.049591	0.966054	1025	3	1025
ZNF324B	4	0.90822	0.90804	0.999876	18214	0	0.016128	0.049673	0.966054	1026	3	1026
CALCB	4	0.32097	0.45413	0.99918	9124	1	0.016169	0.049756	0.966054	1027	3	1027
JAM2	4	0.72873	0.73982	0.999876	14829	1	0.016176	0.049774	0.966054	1028	3	1028
RAB11B	4	0.6379	0.67669	0.999876	13572	1	0.016177	0.049776	0.966054	1029	2	1029
FAM71E1	4	0.089876	0.18994	0.99646	3826	1	0.016206	0.049845	0.966054	1030	3	1030
CHRNA4	4	0.14316	0.26737	0.99646	5372	2	0.016221	0.049881	0.966054	1031	2	1031
VAPB	4	0.015866	0.047932	0.97167	981	3	0.016231	0.049895	0.966054	1032	1	1032
CBR3	4	0.83441	0.83423	0.999876	16740	0	0.016252	0.049932	0.966054	1033	3	1033
MAT1A	4	0.5815	0.64291	0.999876	12892	1	0.016266	0.049959	0.966054	1034	3	1034
POLR3D	4	0.53771	0.61888	0.999876	12415	1	0.016282	0.049994	0.966054	1035	1	1035
PLXDC2	4	0.59104	0.64839	0.999876	12998	1	0.016301	0.050034	0.966054	1037	3	1036
POTEA	4	0.98191	0.98188	0.999876	19688	0	0.016301	0.050034	0.966054	1036	3	1037
IFFO1	4	0.3478	0.48211	0.99918	9690	2	0.016327	0.05009	0.966054	1038	2	1038
ERH	4	0.78928	0.79032	0.999876	15870	1	0.016333	0.050103	0.966054	1039	3	1039
EBF2	4	0.56653	0.63456	0.999876	12725	1	0.016384	0.050213	0.966054	1040	1	1040
ADIPOR1	4	0.0073787	0.024151	0.97167	482	1	0.016393	0.050232	0.966054	1041	3	1041
TLX2	4	0.20656	0.33441	0.997888	6732	1	0.016404	0.050247	0.966054	1042	3	1042
FAT1	4	0.074147	0.16164	0.992151	3266	2	0.016436	0.050318	0.966054	1043	1	1043
GALNT4	4	0.67269	0.69928	0.999876	14025	1	0.016502	0.050451	0.966054	1044	3	1044
ARF1	4	0.43591	0.56825	0.999876	11375	1	0.016535	0.050517	0.966054	1045	3	1045
ADH5	4	0.64129	0.67881	0.999876	13610	1	0.016538	0.050524	0.966054	1046	1	1046
ANXA8L1	4	0.19611	0.32341	0.997888	6498	1	0.016538	0.050525	0.966054	1047	2	1047
STXBP1	4	0.6987	0.71749	0.999876	14383	1	0.016586	0.050621	0.966054	1048	3	1048
HIST1H4F	4	0.86787	0.86779	0.999876	17403	0	0.016589	0.050626	0.966054	1049	3	1049
RRAS	4	0.55491	0.62812	0.999876	12578	1	0.016619	0.050684	0.966054	1050	3	1050
SGSM3	4	0.96568	0.96558	0.999876	19353	0	0.016638	0.050726	0.966054	1051	3	1051
ANKRD23	4	0.63066	0.67217	0.999876	13465	1	0.016641	0.050732	0.966054	1052	2	1052
IFI44L	4	0.077231	0.1673	0.992151	3383	1	0.016658	0.050769	0.966054	1053	3	1053
SLC39A3	4	0.9791	0.97902	0.999876	19637	0	0.01666	0.050774	0.966054	1054	3	1054
UBTD2	4	0.19958	0.32703	0.997888	6565	2	0.016692	0.050842	0.966054	1055	1	1055
ZNF878	4	0.3826	0.51823	0.999876	10402	2	0.016698	0.05085	0.966054	1056	2	1056
FGD4	4	0.37441	0.50969	0.999876	10237	1	0.01674	0.050941	0.966054	1057	2	1057
GGA2	4	0.35205	0.48647	0.999404	9779	2	0.016743	0.050947	0.966054	1058	2	1058
PPCS	4	0.13321	0.25686	0.99646	5179	2	0.016767	0.050999	0.966054	1059	2	1059
ZNF365	4	0.90406	0.90387	0.999876	18140	0	0.016772	0.051012	0.966054	1060	3	1060
TKT	4	0.9771	0.97699	0.999876	19594	0	0.016777	0.051025	0.966054	1061	3	1061
TRIM49C	4	0.62949	0.67146	0.999876	13452	1	0.016785	0.051042	0.966054	1062	3	1062
LYST	4	0.31039	0.44316	0.99918	8899	2	0.016795	0.05106	0.966054	1063	1	1063
CXorf49B	4	0.81484	0.81478	0.999876	16360	0	0.016843	0.051171	0.966425	1064	2	1064
TIMM9	4	0.1121	0.22888	0.99646	4598	2	0.016846	0.051176	0.966425	1065	2	1065
SUCLA2	4	0.26066	0.39138	0.99918	7872	2	0.016897	0.051288	0.967597	1066	1	1066
TMEM170B	4	0.79122	0.79215	0.999876	15909	1	0.016943	0.05138	0.967597	1067	3	1067
HSD17B11	4	0.83597	0.83578	0.999876	16771	0	0.016948	0.051392	0.967597	1068	2	1068
APOA2	4	0.71994	0.73317	0.999876	14695	1	0.016966	0.05143	0.967597	1069	3	1069
DNER	4	0.87293	0.87285	0.999876	17517	0	0.017024	0.051548	0.968744	1070	3	1070
FUT8	4	0.0868	0.18451	0.99646	3711	2	0.017051	0.051612	0.968744	1071	2	1071
DACT1	4	0.87957	0.87947	0.999876	17648	0	0.017073	0.051664	0.968744	1072	3	1072
ZNF138	4	0.82914	0.829	0.999876	16646	0	0.017102	0.051722	0.968744	1073	2	1073
TRMT10B	4	0.69156	0.71237	0.999876	14278	1	0.017108	0.051732	0.968744	1074	3	1074
FCRL5	4	0.7239	0.73616	0.999876	14756	1	0.017143	0.051804	0.969196	1075	2	1075
KIAA0319L	4	0.76871	0.77211	0.999876	15467	1	0.017243	0.052027	0.970356	1076	2	1076
MYLPF	4	0.8783	0.87819	0.999876	17628	0	0.017256	0.052051	0.970356	1077	3	1077
XIRP2	4	0.73101	0.74156	0.999876	14860	1	0.017272	0.052088	0.970356	1078	3	1078
DPP6	4	0.30158	0.43412	0.99918	8726	1	0.01728	0.052106	0.970356	1079	3	1079
C16orf90	4	0.33742	0.47123	0.99918	9453	2	0.017307	0.052156	0.970356	1080	2	1080
ELL	4	0.91535	0.91515	0.999876	18360	0	0.017336	0.052214	0.970356	1081	3	1081
KCNJ9	4	0.90136	0.90119	0.999876	18086	0	0.017358	0.052258	0.970356	1082	3	1082
PRND	4	0.94345	0.94331	0.999876	18918	0	0.01741	0.052353	0.970356	1083	2	1083
MRPL1	4	0.49241	0.59554	0.999876	11940	1	0.017468	0.052467	0.970356	1084	3	1084
ACTL6A	4	0.61429	0.6621	0.999876	13286	1	0.017479	0.052491	0.970356	1085	3	1085
PBDC1	4	0.51401	0.60654	0.999876	12164	1	0.017491	0.052515	0.970356	1086	2	1086
GABRA5	4	0.97802	0.97791	0.999876	19614	0	0.017502	0.052543	0.970356	1087	3	1087
ZNF429	4	0.53033	0.61498	0.999876	12339	1	0.017512	0.05256	0.970356	1088	3	1088
FER	4	0.21712	0.34561	0.997888	6954	2	0.017526	0.05259	0.970356	1089	2	1089
ZMYM6NB	4	0.62508	0.66873	0.999876	13398	1	0.017526	0.05259	0.970356	1090	2	1090
SEMA4A	4	0.15424	0.27901	0.99646	5622	2	0.017563	0.052654	0.970482	1091	2	1091
ADCY5	4	0.92268	0.92253	0.999876	18507	0	0.017589	0.052713	0.970482	1092	3	1092
PLCXD3	4	0.28218	0.41385	0.99918	8302	1	0.017615	0.052768	0.970482	1093	2	1093
RNLS	4	0.53696	0.61852	0.999876	12405	1	0.017663	0.052868	0.970482	1094	2	1094
NBPF6	4	0.88482	0.8847	0.999876	17752	0	0.017677	0.052902	0.970482	1095	3	1095
ATAD5	4	0.92666	0.92655	0.999876	18580	0	0.017701	0.052955	0.970482	1096	3	1097
MAD2L1BP	4	0.31107	0.44384	0.99918	8913	2	0.017702	0.052955	0.970482	1097	2	1096
KIAA0907	4	0.73386	0.74376	0.999876	14901	1	0.017717	0.052983	0.970482	1098	2	1098
BMP15	4	0.32316	0.45644	0.99918	9168	2	0.017768	0.053085	0.970804	1099	1	1099
PRELP	4	0.91666	0.91647	0.999876	18390	0	0.017797	0.053142	0.970804	1100	3	1100
ZNF175	4	0.11733	0.2379	0.99646	4784	2	0.01782	0.053185	0.970804	1101	2	1101
NELFB	4	0.51249	0.60574	0.999876	12146	1	0.017835	0.053214	0.970804	1102	3	1102
SLC17A3	4	0.12029	0.24288	0.99646	4891	3	0.017871	0.05328	0.970804	1103	1	1103
CLIP1	4	0.93149	0.93143	0.999876	18697	0	0.017875	0.05329	0.970804	1104	3	1104
SAA1	4	0.034717	0.086655	0.982438	1763	1	0.017922	0.053401	0.971564	1105	2	1105
SLC1A3	4	0.97823	0.97811	0.999876	19619	0	0.017933	0.053428	0.971564	1106	3	1106
PTAFR	4	0.62245	0.66708	0.999876	13367	1	0.017973	0.053501	0.971712	1107	2	1107
CUX1	4	0.82834	0.82818	0.999876	16630	0	0.017991	0.053537	0.971712	1108	3	1108
PRAMEF20	4	0.97174	0.97164	0.999876	19485	0	0.01801	0.053581	0.971712	1109	3	1109
IRF3	4	0.84756	0.8474	0.999876	17001	0	0.018079	0.053723	0.973406	1110	3	1110
AGPAT6	4	0.88824	0.8881	0.999876	17815	0	0.018111	0.053782	0.973599	1111	2	1111
LTA4H	4	0.71496	0.72943	0.999876	14626	1	0.018141	0.05385	0.973943	1112	3	1112
SUPT16H	4	0.10905	0.22351	0.99646	4492	3	0.018204	0.053983	0.974243	1113	1	1113
MRLN	4	0.47886	0.58881	0.999876	11818	1	0.018222	0.054024	0.974243	1114	2	1114
OR2A2	4	0.95257	0.95245	0.999876	19092	0	0.018234	0.054052	0.974243	1115	3	1115
CDC123	4	0.97031	0.97023	0.999876	19459	0	0.018332	0.054253	0.974243	1116	3	1116
MYBL2	4	0.64736	0.68268	0.999876	13680	1	0.018383	0.054345	0.974243	1117	2	1117
KIF13B	4	0.64991	0.68434	0.999876	13722	1	0.018425	0.054425	0.974243	1118	3	1118
AEBP1	4	0.021631	0.059966	0.97945	1229	2	0.018434	0.054443	0.974243	1119	1	1119
UCP3	4	0.9287	0.92864	0.999876	18626	0	0.018435	0.054445	0.974243	1120	3	1120
TOPBP1	4	0.20597	0.33379	0.997888	6716	2	0.018485	0.054555	0.974243	1121	2	1121
C9orf43	4	0.24162	0.3714	0.99918	7468	2	0.018533	0.054666	0.974243	1122	2	1122
FAM47C	4	0.77404	0.77675	0.999876	15581	1	0.018533	0.054666	0.974243	1123	3	1123
ZNF816	4	0.0013234	0.004617	0.829075	112	1	0.018537	0.054673	0.974243	1124	2	1124
PASK	4	0.79291	0.79367	0.999876	15934	1	0.018539	0.054679	0.974243	1125	3	1125
MAGEA3	4	0.66736	0.69569	0.999876	13953	1	0.018588	0.054766	0.974243	1126	2	1126
NHEJ1	4	0.66983	0.69732	0.999876	13991	1	0.018639	0.05487	0.974243	1127	1	1127
LEPROT	4	0.69855	0.71738	0.999876	14379	1	0.018645	0.054882	0.974243	1128	3	1128
ARRDC4	4	0.73218	0.74246	0.999876	14876	1	0.018655	0.054903	0.974243	1130	3	1129
SEMA4B	4	0.91279	0.91262	0.999876	18309	0	0.018655	0.054903	0.974243	1129	3	1130
NLRX1	4	0.7684	0.77186	0.999876	15463	1	0.0187	0.055	0.974243	1131	3	1131
WDHD1	4	0.68471	0.70758	0.999876	14197	1	0.018722	0.055048	0.974243	1132	3	1132
C3orf79	4	0.040549	0.098161	0.982438	1998	3	0.018741	0.055088	0.974243	1134	1	1133
GKN2	4	0.15178	0.27649	0.99646	5559	2	0.018741	0.055088	0.974243	1133	2	1134
XRCC3	4	0.058563	0.1327	0.984068	2712	2	0.018773	0.055163	0.974243	1135	2	1135
HEMK1	4	0.81793	0.81787	0.999876	16423	0	0.018781	0.05518	0.974243	1136	2	1136
LYRM5	4	0.15716	0.28209	0.99646	5680	1	0.018793	0.055201	0.974243	1137	1	1137
ZNF614	4	0.65377	0.68677	0.999876	13778	1	0.018844	0.055303	0.974243	1138	2	1138
CDC37	4	0.95981	0.95964	0.999876	19241	0	0.018854	0.055323	0.974243	1139	2	1139
ODF3B	4	0.90484	0.90462	0.999876	18154	0	0.018895	0.055422	0.974243	1140	2	1140
SFT2D2	4	0.90459	0.90437	0.999876	18149	0	0.018918	0.05548	0.974243	1141	3	1141
CR2	4	0.62421	0.66818	0.999876	13391	1	0.018946	0.05554	0.974243	1142	2	1142
LRRTM4	4	0.688	0.70986	0.999876	14237	1	0.018967	0.055589	0.974243	1143	2	1143
NEK10	4	0.89683	0.89668	0.999876	17996	0	0.018983	0.055627	0.974243	1144	3	1144
KRT72	4	0.47351	0.58617	0.999876	11763	1	0.018994	0.055645	0.974243	1145	3	1145
NLGN3	4	0.34318	0.47723	0.99918	9573	1	0.018997	0.055655	0.974243	1146	2	1146
GNAT3	4	0.089984	0.19013	0.99646	3832	2	0.019048	0.055759	0.974243	1147	2	1147
COMMD8	4	0.016333	0.048898	0.97167	1004	1	0.019077	0.055825	0.974243	1148	3	1148
WNT5B	4	0.18605	0.31272	0.996821	6307	2	0.01908	0.05583	0.974243	1149	2	1149
PRSS23	4	0.8645	0.86442	0.999876	17322	0	0.0191	0.055873	0.974243	1150	1	1150
RBM11	4	0.84302	0.84285	0.999876	16918	0	0.019104	0.055881	0.974243	1151	2	1151
TYRO3	4	0.075812	0.16472	0.992151	3329	2	0.019151	0.055981	0.974243	1152	1	1152
LCE1B	4	0.13902	0.26299	0.99646	5300	1	0.019173	0.056027	0.974243	1153	3	1153
SHBG	4	0.25952	0.3902	0.99918	7847	2	0.019202	0.056093	0.974243	1154	2	1154
CCDC154	4	0.41913	0.55661	0.999876	11148	1	0.019238	0.056168	0.974243	1155	3	1155
ATXN3L	4	0.90184	0.90168	0.999876	18095	0	0.019253	0.056202	0.974243	1156	2	1156
SLC9C1	4	0.89287	0.89278	0.999876	17899	0	0.019307	0.056318	0.974243	1157	2	1157
NR3C2	4	0.46451	0.58182	0.999876	11660	1	0.019324	0.056349	0.974243	1158	2	1158
CYP4F3	4	0.53264	0.61621	0.999876	12367	1	0.019356	0.056406	0.974243	1159	1	1159
NOX5	4	0.28586	0.4177	0.99918	8390	2	0.019407	0.056515	0.974243	1160	2	1160
CHRM2	4	0.096703	0.20192	0.99646	4060	1	0.019413	0.056528	0.974243	1161	3	1161
EDRF1	4	0.87175	0.87164	0.999876	17486	0	0.019457	0.056612	0.974243	1162	3	1163
UNC45B	4	0.78658	0.78787	0.999876	15805	1	0.019458	0.056612	0.974243	1163	2	1162
DIS3L	4	0.24853	0.37869	0.99918	7615	1	0.01948	0.056654	0.974243	1164	2	1164
APC	4	0.97961	0.97955	0.999876	19645	0	0.019482	0.056657	0.974243	1165	3	1165
OR1E1	4	0.72862	0.73973	0.999876	14827	1	0.019511	0.056721	0.974243	1166	3	1166
HORMAD1	4	0.91286	0.91269	0.999876	18317	0	0.01956	0.056819	0.974243	1167	1	1167
STXBP5L	4	0.32664	0.46009	0.99918	9241	1	0.019579	0.056861	0.974243	1168	3	1168
NEK1	4	0.90585	0.90566	0.999876	18178	0	0.019609	0.056923	0.974243	1169	3	1169
HSPA13	4	0.79403	0.79469	0.999876	15954	1	0.019611	0.056926	0.974243	1170	1	1170
PPM1F	4	0.50219	0.60045	0.999876	12041	1	0.019613	0.05693	0.974243	1171	3	1171
TNFRSF21	4	0.1324	0.256	0.99646	5162	2	0.019618	0.056939	0.974243	1172	2	1172
ADAMTS5	4	0.085028	0.18126	0.99646	3656	1	0.019638	0.056977	0.974243	1173	3	1173
HAUS4	4	0.8353	0.83511	0.999876	16759	0	0.01965	0.057001	0.974243	1174	3	1174
LGALS13	4	0.51687	0.60806	0.999876	12193	1	0.019663	0.057025	0.974243	1175	1	1175
ZNF19	4	0.95472	0.95455	0.999876	19144	0	0.019672	0.05704	0.974243	1176	2	1176
MAPK8	4	0.25488	0.3853	0.99918	7749	2	0.019714	0.057123	0.974243	1177	1	1177
NDST2	4	0.70503	0.72209	0.999876	14472	1	0.01976	0.057213	0.974243	1178	3	1178
SOX8	4	0.11549	0.23473	0.99646	4723	2	0.019765	0.057222	0.974243	1179	1	1179
IFNW1	4	0.70889	0.72494	0.999876	14534	1	0.019779	0.05725	0.974243	1180	3	1180
SRSF3	4	0.971	0.97091	0.999876	19475	0	0.019807	0.057316	0.974243	1181	3	1181
PEX26	4	0.050205	0.11687	0.982438	2376	3	0.019816	0.057332	0.974243	1182	1	1182
OLIG2	4	0.92551	0.92537	0.999876	18561	0	0.019832	0.057363	0.974243	1183	3	1183
GPBP1L1	4	0.92302	0.92288	0.999876	18517	0	0.019844	0.057391	0.974243	1184	3	1184
MS4A1	4	0.72964	0.74053	0.999876	14841	1	0.019867	0.057439	0.974243	1185	3	1185
LRRC38	4	0.57962	0.64188	0.999876	12869	1	0.019903	0.057519	0.974243	1186	3	1186
HBS1L	4	0.87256	0.87248	0.999876	17504	0	0.019918	0.057545	0.974243	1187	2	1187
NonTargetingControl_842	1	0.98008	0.98005	0.999876	19656	0	0.01992	0.057548	0.974243	1188	1	1188
LPPR3	4	0.48549	0.59211	0.999876	11880	1	0.019973	0.057651	0.974722	1189	3	1189
FOXRED1	4	0.47024	0.58458	0.999876	11720	1	0.020021	0.05775	0.974722	1190	2	1190
ARRDC3	4	0.96953	0.96941	0.999876	19442	0	0.020072	0.057856	0.974722	1191	3	1191
COX10	4	0.31978	0.45288	0.99918	9105	2	0.020092	0.057895	0.974722	1192	2	1192
NBPF10	4	0.96186	0.96176	0.999876	19284	0	0.020101	0.057916	0.974722	1193	3	1193
ZFR	4	0.92775	0.92768	0.999876	18607	0	0.020109	0.057937	0.974722	1194	3	1194
MAP3K7CL	4	0.37348	0.50873	0.999876	10212	1	0.020123	0.057959	0.974722	1195	1	1195
THEGL	4	0.099946	0.20772	0.99646	4176	1	0.020125	0.057964	0.974722	1196	3	1196
IPO5	4	0.43618	0.56838	0.999876	11382	1	0.020174	0.058065	0.975603	1197	1	1197
MRPL48	4	0.068006	0.1503	0.991047	3048	1	0.020225	0.05817	0.975761	1198	1	1198
MOB4	4	0.89003	0.88996	0.999876	17838	0	0.020246	0.058209	0.975761	1199	2	1199
P2RY12	4	0.25436	0.38477	0.99918	7742	2	0.020276	0.058276	0.975761	1200	2	1200
YIPF4	4	0.8096	0.80952	0.999876	16252	1	0.020317	0.058346	0.975761	1201	3	1201
NEK4	4	0.75058	0.75701	0.999876	15160	1	0.020327	0.058366	0.975761	1202	2	1202
HIGD1A	4	0.59149	0.64866	0.999876	13001	1	0.020362	0.058441	0.975761	1203	2	1203
ZMIZ2	4	0.91292	0.91274	0.999876	18319	0	0.020389	0.058489	0.975761	1204	3	1204
FITM2	4	0.3887	0.52457	0.999876	10529	1	0.020404	0.058511	0.975761	1205	2	1205
SLC35A5	4	0.72638	0.73802	0.999876	14792	1	0.020404	0.058511	0.975761	1206	2	1206
ZFYVE16	4	0.40992	0.54689	0.999876	10966	1	0.020529	0.058769	0.979214	1207	3	1207
RHEBL1	4	0.98255	0.98251	0.999876	19701	0	0.020584	0.058885	0.979214	1208	3	1208
C12orf57	4	0.88045	0.88035	0.999876	17660	0	0.020588	0.058893	0.979214	1209	3	1209
KRT36	4	0.16108	0.28628	0.99646	5763	1	0.020602	0.058921	0.979214	1210	3	1210
ETV5	4	0.80663	0.80668	0.999876	16183	1	0.020634	0.058997	0.979214	1211	1	1211
SCRT1	4	0.1909	0.31792	0.997888	6394	1	0.02064	0.05901	0.979214	1212	3	1212
LPCAT2	4	0.77462	0.77726	0.999876	15592	1	0.020685	0.059105	0.979421	1213	1	1213
MAP3K9	4	0.30853	0.44121	0.99918	8864	2	0.020736	0.059217	0.979421	1214	1	1214
TNFRSF6B	4	0.84271	0.84252	0.999876	16914	0	0.020747	0.059238	0.979421	1215	3	1215
RPL30	4	0.13446	0.25815	0.99646	5206	2	0.020748	0.05924	0.979421	1216	2	1216
HIST1H2BN	4	0.8682	0.86813	0.999876	17413	0	0.02076	0.059266	0.979421	1217	2	1217
TRIM16L	4	0.96702	0.96693	0.999876	19384	0	0.020787	0.059319	0.979495	1218	3	1218
MUC3A	4	0.90167	0.9015	0.999876	18090	0	0.020841	0.059432	0.980275	1219	2	1219
GLP1R	4	0.88386	0.88378	0.999876	17728	0	0.02089	0.059528	0.980275	1220	3	1220
AGPAT2	4	0.77456	0.7772	0.999876	15591	1	0.0209	0.059545	0.980275	1221	3	1221
LGALS16	4	0.29551	0.42785	0.99918	8594	1	0.020908	0.059561	0.980275	1222	2	1222
ATXN7L1	4	0.39961	0.53611	0.999876	10739	1	0.020941	0.05964	0.980761	1223	2	1223
COX5B	4	0.060621	0.13661	0.987336	2777	1	0.020978	0.059716	0.981221	1224	3	1224
OR10P1	4	0.89618	0.89604	0.999876	17982	0	0.021094	0.059948	0.982409	1225	3	1225
CNNM3	4	0.33092	0.46456	0.99918	9325	2	0.021145	0.060058	0.982409	1226	1	1226
COL4A3BP	4	0.45492	0.5772	0.999876	11557	1	0.021184	0.060139	0.982409	1227	3	1227
SPAG8	4	0.97234	0.97229	0.999876	19498	0	0.021196	0.060175	0.982409	1228	3	1228
KIF16B	4	0.19172	0.31878	0.997888	6411	2	0.021247	0.060279	0.982409	1229	2	1229
HIST1H2BI	4	0.35658	0.49116	0.999404	9881	2	0.021247	0.06028	0.982409	1230	1	1230
ECSIT	4	0.84801	0.84786	0.999876	17011	0	0.021274	0.060333	0.982409	1231	3	1231
CD2BP2	4	0.33567	0.46942	0.99918	9420	2	0.021299	0.060372	0.982409	1232	2	1232
CLDN8	4	0.78494	0.78643	0.999876	15772	1	0.02135	0.06049	0.982409	1233	2	1233
CD3E	4	0.72	0.73321	0.999876	14697	1	0.021376	0.060544	0.982409	1235	3	1234
FKBP1B	4	0.82589	0.82578	0.999876	16584	0	0.021376	0.060544	0.982409	1234	3	1235
OS9	4	0.79379	0.79447	0.999876	15951	1	0.021388	0.060571	0.982409	1236	3	1236
ACOX3	4	0.80948	0.80938	0.999876	16244	1	0.021388	0.060571	0.982409	1237	2	1237
POU2F3	4	0.75534	0.76092	0.999876	15245	1	0.021401	0.060596	0.982409	1238	2	1238
PXDN	4	0.83544	0.83525	0.999876	16762	0	0.021419	0.060637	0.982409	1239	3	1239
LRRC70	4	0.91642	0.91623	0.999876	18386	0	0.021432	0.060662	0.982409	1240	3	1240
GAGE2A	4	0.91378	0.91359	0.999876	18328	0	0.021503	0.06081	0.982409	1241	2	1241
LOC101927844	4	0.96227	0.96218	0.999876	19292	0	0.02157	0.060952	0.982409	1242	3	1242
SP9	4	0.30731	0.43999	0.99918	8841	1	0.021605	0.061021	0.982409	1243	3	1243
PEBP1	4	0.047022	0.11084	0.982438	2244	1	0.021606	0.061023	0.982409	1244	2	1244
ZNF16	4	0.018922	0.054383	0.97167	1121	2	0.021656	0.06113	0.982409	1245	2	1245
XPA	4	0.80497	0.80505	0.999876	16156	1	0.021691	0.061195	0.982409	1246	3	1246
SLCO2A1	4	0.27969	0.41127	0.99918	8253	2	0.021707	0.061224	0.982409	1247	2	1247
MOV10L1	4	0.2746	0.406	0.99918	8142	1	0.021752	0.061326	0.982409	1248	2	1248
RWDD2B	4	0.25329	0.38364	0.99918	7715	1	0.021758	0.061337	0.982409	1249	1	1249
RPL23	4	0.73364	0.7436	0.999876	14899	0	0.021784	0.061388	0.982409	1250	2	1250
TRAF3IP2	4	0.8478	0.84764	0.999876	17006	0	0.021786	0.06139	0.982409	1251	3	1251
RPUSD4	4	0.34673	0.48099	0.99918	9657	1	0.021807	0.061427	0.982409	1252	3	1252
WFDC3	4	0.85989	0.85982	0.999876	17238	0	0.02186	0.061541	0.982409	1253	2	1253
MST1	4	0.31219	0.44498	0.99918	8939	1	0.021871	0.061561	0.982409	1254	3	1254
POLR2M	4	0.95175	0.95162	0.999876	19076	0	0.021872	0.061562	0.982409	1255	2	1255
GTF2B	4	0.056207	0.12826	0.983649	2622	2	0.021911	0.061649	0.982409	1256	2	1256
ST7L	4	0.26782	0.39884	0.99918	8009	1	0.021921	0.061666	0.982409	1257	3	1257
TEKT3	4	0.92926	0.9292	0.999876	18642	0	0.021932	0.061691	0.982409	1258	3	1258
DBNDD1	4	0.39368	0.52986	0.999876	10624	2	0.021976	0.061791	0.982409	1259	2	1259
WTAP	4	0.87158	0.87147	0.999876	17484	0	0.021984	0.061808	0.982409	1260	2	1260
MED26	4	0.97815	0.97804	0.999876	19617	0	0.021998	0.061835	0.982409	1261	3	1261
C12orf77	4	0.97799	0.97787	0.999876	19612	0	0.022009	0.061859	0.982409	1262	2	1262
PPIAL4F	4	0.1653	0.29076	0.99646	5859	2	0.022014	0.06187	0.982409	1263	1	1263
ASS1	4	0.8459	0.84574	0.999876	16967	0	0.022036	0.061917	0.982409	1264	2	1264
CKMT1A	4	0.97794	0.97782	0.999876	19610	0	0.022061	0.061976	0.982409	1265	3	1265
ACOX1	4	0.39945	0.53594	0.999876	10734	1	0.022065	0.061982	0.982409	1266	3	1266
HIST1H2AE	4	0.98162	0.98159	0.999876	19684	0	0.022105	0.062061	0.982409	1267	3	1267
CSF1	4	0.34744	0.48176	0.99918	9678	2	0.022118	0.062089	0.982409	1269	2	1268
LRRC55	4	0.94407	0.94394	0.999876	18929	0	0.022118	0.062089	0.982409	1268	3	1269
ERMN	4	0.40023	0.53678	0.999876	10753	1	0.022186	0.062229	0.982409	1270	3	1270
MCOLN1	4	0.67801	0.7029	0.999876	14104	1	0.022209	0.062281	0.982409	1271	3	1271
GLMP	4	0.90822	0.90804	0.999876	18213	0	0.022231	0.062329	0.982409	1272	3	1272
CXCL8	4	0.95126	0.95112	0.999876	19066	0	0.022243	0.062355	0.982409	1273	3	1273
HIP1	4	0.00077674	0.0027118	0.740882	69	3	0.022269	0.062414	0.982409	1274	1	1274
COL9A1	4	0.24345	0.37334	0.99918	7504	2	0.02232	0.062514	0.982409	1275	2	1275
ACSM2A	4	0.75522	0.76081	0.999876	15242	1	0.022327	0.062532	0.982409	1276	2	1276
LRRN2	4	0.3951	0.5313	0.999876	10653	1	0.022331	0.062544	0.982409	1277	3	1277
LARGE	4	0.92606	0.92594	0.999876	18569	0	0.02234	0.062554	0.982409	1278	2	1278
FOXD4L4	4	0.84623	0.84607	0.999876	16976	0	0.022388	0.062657	0.982409	1279	2	1279
B4GALT3	4	0.27373	0.40506	0.99918	8128	2	0.022418	0.062716	0.982409	1280	2	1280
TMA16	4	0.69628	0.71571	0.999876	14349	1	0.022422	0.062723	0.982409	1281	3	1281
S100Z	4	0.041754	0.10057	0.982438	2048	3	0.022473	0.06283	0.982409	1282	1	1282
PSMG1	4	0.31875	0.45182	0.99918	9080	2	0.022514	0.06293	0.982409	1283	2	1283
MAP2K5	4	0.030919	0.079184	0.982438	1606	2	0.02255	0.063001	0.982409	1284	1	1284
PRKAG2	4	0.88682	0.88666	0.999876	17793	0	0.02255	0.063001	0.982409	1285	3	1285
GDF5	4	0.54616	0.62337	0.999876	12492	1	0.022606	0.063123	0.982409	1286	2	1286
NonTargetingControl_645	1	0.97739	0.97728	0.999876	19599	0	0.022607	0.063125	0.982409	1287	1	1287
TRAPPC6B	4	0.89285	0.89276	0.999876	17898	0	0.022626	0.063171	0.982409	1288	3	1288
GPR139	4	0.96487	0.96476	0.999876	19339	0	0.02271	0.063338	0.982409	1289	3	1289
PRDM9	4	0.74597	0.75329	0.999876	15075	1	0.022728	0.063378	0.982409	1290	2	1290
HAO1	4	0.91081	0.91062	0.999876	18268	0	0.022768	0.063463	0.982409	1291	3	1291
EFNA4	4	0.50057	0.59964	0.999876	12022	1	0.022791	0.063506	0.982409	1292	3	1292
LOC388813	4	0.37525	0.51057	0.999876	10251	1	0.022794	0.063509	0.982409	1294	3	1293
CIZ1	4	0.57282	0.63812	0.999876	12800	1	0.022794	0.063509	0.982409	1293	2	1294
DPH5	4	0.40553	0.54231	0.999876	10876	2	0.022821	0.063565	0.982409	1295	2	1295
ZNF74	4	0.15254	0.27727	0.99646	5577	1	0.02283	0.063587	0.982409	1296	2	1296
SETD4	4	0.71258	0.72768	0.999876	14589	1	0.022849	0.063615	0.982409	1297	3	1297
NUP62	4	0.74556	0.75296	0.999876	15069	1	0.022922	0.063766	0.982409	1298	3	1298
CCDC180	4	0.80326	0.80338	0.999876	16119	1	0.022932	0.06378	0.982409	1299	2	1299
ATAD3C	4	0.78383	0.78544	0.999876	15751	1	0.022934	0.063781	0.982409	1300	3	1300
MFSD10	4	0.61061	0.65996	0.999876	13242	1	0.022961	0.063831	0.982409	1301	3	1301
FOXL2	4	0.73674	0.746	0.999876	14941	1	0.022983	0.063881	0.982409	1302	2	1302
CCDC82	4	0.34556	0.47976	0.99918	9627	1	0.022992	0.063899	0.982409	1303	2	1303
LOC728392	4	0.14801	0.27256	0.99646	5480	1	0.022997	0.063906	0.982409	1304	3	1304
PYGO1	4	0.98328	0.98325	0.999876	19713	0	0.02301	0.063928	0.982409	1305	3	1305
SLC8B1	4	0.95397	0.95382	0.999876	19122	0	0.023035	0.063984	0.982409	1306	3	1306
KIF11	4	0.88982	0.88974	0.999876	17835	0	0.023046	0.064006	0.982409	1307	3	1307
BCO1	4	0.39503	0.53122	0.999876	10649	1	0.023049	0.064014	0.982409	1308	2	1308
EIF3A	4	0.86175	0.86166	0.999876	17272	0	0.023075	0.064059	0.982409	1309	3	1309
DCTN6	4	0.29087	0.42295	0.99918	8495	1	0.023086	0.06408	0.982409	1310	2	1310
TMEM189	4	0.0029305	0.010031	0.941658	211	1	0.023131	0.064188	0.982409	1311	3	1311
SLC25A40	4	0.95146	0.95133	0.999876	19068	0	0.023137	0.064194	0.982409	1312	3	1312
PPM1L	4	0.0082563	0.02686	0.97167	544	2	0.023188	0.064297	0.982409	1313	2	1313
CYLC1	4	0.082962	0.1776	0.994143	3592	1	0.023239	0.064396	0.982409	1314	2	1314
NXPH2	4	0.47164	0.58528	0.999876	11737	1	0.023271	0.064459	0.982409	1315	3	1315
CELF1	4	0.90228	0.90212	0.999876	18106	0	0.023278	0.064468	0.982409	1316	3	1316
NOTCH2NL	4	0.88954	0.88946	0.999876	17831	0	0.02329	0.064494	0.982409	1317	3	1317
PSMD3	4	0.39792	0.53432	0.999876	10701	1	0.023315	0.064561	0.982409	1318	3	1318
IFT81	4	0.8267	0.82658	0.999876	16598	0	0.02333	0.064597	0.982409	1319	3	1319
TRPM2	4	0.91237	0.91219	0.999876	18300	0	0.023333	0.0646	0.982409	1320	2	1320
UNC79	4	0.74592	0.75325	0.999876	15074	1	0.023341	0.064619	0.982409	1321	3	1321
EIF3L	4	0.76408	0.76815	0.999876	15388	1	0.023392	0.064722	0.982409	1322	2	1322
RCE1	4	0.86766	0.86758	0.999876	17395	0	0.023443	0.064816	0.982409	1323	1	1323
HELZ	4	0.14861	0.27316	0.99646	5492	2	0.023494	0.064925	0.982409	1324	1	1324
TSG101	4	0.88373	0.88365	0.999876	17725	0	0.023512	0.064969	0.982409	1325	3	1325
UBQLN1	4	0.69471	0.71459	0.999876	14327	1	0.023545	0.065025	0.982409	1326	2	1326
BMP7	4	0.96334	0.96324	0.999876	19311	0	0.023555	0.065046	0.982409	1327	3	1327
ZSCAN30	4	0.28124	0.4129	0.99918	8282	2	0.023596	0.065123	0.982409	1328	2	1328
OR4L1	4	0.11264	0.22981	0.99646	4613	1	0.02364	0.06521	0.982409	1329	2	1329
CDK2AP2	4	0.82681	0.82669	0.999876	16603	0	0.023649	0.065226	0.982409	1330	3	1330
NonTargetingControl_813	1	0.97633	0.97624	0.999876	19579	0	0.023671	0.065266	0.982409	1331	1	1331
ELOVL2	4	0.50805	0.60345	0.999876	12103	1	0.023675	0.065273	0.982409	1332	2	1332
TRMT1	4	0.90055	0.90036	0.999876	18072	0	0.023772	0.065475	0.982409	1333	3	1333
OR4D6	4	0.33618	0.46996	0.99918	9428	1	0.0238	0.065529	0.982409	1334	1	1334
MT2A	4	0.65348	0.68658	0.999876	13772	1	0.023851	0.065629	0.982409	1335	2	1335
NonTargetingControl_931	1	0.97612	0.97604	0.999876	19573	0	0.023879	0.065683	0.982409	1336	1	1336
KIAA0196	4	0.19958	0.32703	0.997888	6566	2	0.023902	0.065727	0.982409	1337	2	1337
ENPP1	4	0.96963	0.9695	0.999876	19445	0	0.023942	0.065813	0.982409	1338	3	1338
INSIG2	4	0.002524	0.0086429	0.929555	187	3	0.023953	0.065841	0.982409	1339	1	1339
CNOT3	4	0.57729	0.6406	0.999876	12840	1	0.023975	0.065879	0.982409	1340	3	1340
PGK2	4	0.28398	0.4157	0.99918	8347	1	0.024055	0.066046	0.982409	1341	3	1341
KCNH7	4	0.8764	0.87632	0.999876	17580	0	0.024055	0.066047	0.982409	1342	3	1342
ENTPD2	4	0.96721	0.96711	0.999876	19391	0	0.024092	0.066116	0.982409	1343	3	1343
MRPS31	4	0.35068	0.48505	0.999404	9751	2	0.024106	0.066145	0.982409	1344	1	1344
GPR75-ASB3	4	0.56292	0.63257	0.999876	12675	1	0.024129	0.066198	0.982409	1345	3	1345
COG7	4	0.93184	0.93179	0.999876	18705	0	0.024136	0.066213	0.982409	1346	3	1346
XRCC6	4	0.74101	0.74935	0.999876	15001	1	0.024146	0.066232	0.982409	1347	3	1347
WAC	4	0.9785	0.97838	0.999876	19628	0	0.024169	0.066278	0.982409	1348	2	1348
PLA2G5	4	0.91015	0.90995	0.999876	18248	0	0.024176	0.066284	0.982409	1349	3	1349
APC2	4	0.48269	0.5907	0.999876	11853	1	0.024208	0.066348	0.982409	1350	1	1350
LYL1	4	0.76205	0.76647	0.999876	15359	1	0.024229	0.066391	0.982409	1352	3	1351
DEFB105B	4	0.97065	0.97056	0.999876	19465	0	0.024229	0.066391	0.982409	1351	3	1352
AP3D1	4	0.48832	0.59351	0.999876	11917	1	0.024259	0.066452	0.982409	1353	2	1353
LYG2	4	0.91458	0.91438	0.999876	18347	0	0.024309	0.066553	0.982409	1354	2	1354
CALCOCO1	4	0.94448	0.94434	0.999876	18936	0	0.024364	0.066673	0.982409	1355	3	1355
C1orf111	4	0.65391	0.68687	0.999876	13781	1	0.024372	0.066693	0.982409	1356	2	1356
OR1B1	4	0.9754	0.97531	0.999876	19554	0	0.024411	0.066765	0.982409	1357	3	1357
MARCKSL1	4	0.93519	0.93517	0.999876	18774	0	0.024426	0.066799	0.982409	1358	3	1358
GPI	4	0.8646	0.86451	0.999876	17325	0	0.024429	0.066805	0.982409	1359	3	1359
CSTF2	4	0.5738	0.63866	0.999876	12808	1	0.024445	0.066841	0.982409	1360	2	1360
CATIP	4	0.45627	0.57786	0.999876	11577	1	0.024462	0.066873	0.982409	1361	2	1361
UBAP1	4	0.75706	0.76231	0.999876	15280	1	0.024517	0.066986	0.982409	1362	2	1362
C16orf92	4	0.3212	0.45437	0.99918	9131	1	0.024541	0.067039	0.982409	1363	3	1363
ST20-MTHFS	4	0.91077	0.91059	0.999876	18265	0	0.024557	0.067073	0.982409	1364	3	1364
MEP1B	4	0.72497	0.73696	0.999876	14767	1	0.024564	0.067089	0.982409	1365	2	1365
STAU1	4	0.71108	0.72657	0.999876	14573	1	0.024581	0.067123	0.982409	1366	3	1366
HTR7	4	0.14037	0.26441	0.99646	5326	2	0.024615	0.067177	0.982409	1367	2	1367
NHLH1	4	0.89079	0.89069	0.999876	17856	0	0.024644	0.067233	0.982409	1368	3	1368
MAP1A	4	0.73048	0.74114	0.999876	14851	1	0.024651	0.067249	0.982409	1369	3	1369
MORF4L2	4	0.92117	0.92104	0.999876	18484	0	0.024651	0.067249	0.982409	1370	3	1370
TM9SF4	4	0.89091	0.89082	0.999876	17858	0	0.024666	0.067285	0.982409	1371	2	1371
SLC5A5	4	0.073461	0.16042	0.992151	3240	1	0.02469	0.067335	0.982409	1372	2	1372
ZNF383	4	0.032136	0.081575	0.982438	1655	1	0.024726	0.067402	0.982409	1373	3	1373
BPGM	4	0.30929	0.442	0.99918	8878	2	0.024768	0.067489	0.982409	1374	2	1374
MRGBP	4	0.1791	0.30541	0.99646	6158	1	0.02479	0.067537	0.982409	1375	3	1375
PLCL1	4	0.93401	0.93396	0.999876	18746	0	0.024801	0.067549	0.982409	1376	3	1376
CXXC1	4	0.87236	0.87229	0.999876	17500	0	0.024819	0.067585	0.982409	1377	2	1377
LAMC2	4	0.9181	0.91789	0.999876	18423	0	0.024827	0.067603	0.982409	1378	3	1378
FAM64A	4	0.075379	0.16389	0.992151	3317	2	0.02484	0.067626	0.982409	1379	2	1379
TNK2	4	0.79021	0.79122	0.999876	15891	1	0.02487	0.067694	0.982409	1380	3	1380
S100A4	4	0.29688	0.42928	0.99918	8617	1	0.024915	0.067784	0.982409	1382	3	1381
CRKL	4	0.66264	0.69258	0.999876	13888	1	0.024915	0.067784	0.982409	1381	3	1382
MMADHC	4	0.88293	0.88286	0.999876	17710	0	0.024921	0.067795	0.982409	1383	2	1383
SMN1	4	0.95215	0.95201	0.999876	19083	0	0.024972	0.067905	0.982409	1384	1	1384
FCGR1B	4	0.82603	0.82591	0.999876	16585	0	0.025023	0.068004	0.982409	1385	3	1385
TREML2	4	0.1025	0.21218	0.99646	4264	3	0.025074	0.068102	0.982409	1386	1	1386
DNAJC28	4	0.96666	0.96658	0.999876	19376	0	0.025092	0.068132	0.982409	1387	3	1387
ARL5B	4	0.63816	0.67686	0.999876	13575	1	0.02515	0.068242	0.982409	1389	2	1388
DPP4	4	0.83214	0.83203	0.999876	16694	0	0.02515	0.068242	0.982409	1388	1	1389
HNRNPUL2	4	0.13262	0.25623	0.99646	5170	1	0.025183	0.068312	0.982409	1390	3	1390
PECR	4	0.60859	0.65874	0.999876	13214	1	0.025196	0.068335	0.982409	1391	3	1391
TAF5L	4	0.30488	0.4375	0.99918	8791	1	0.025211	0.06836	0.982409	1392	3	1392
ZNF449	4	0.76721	0.77081	0.999876	15440	1	0.025278	0.068498	0.982409	1393	2	1393
C22orf23	4	0.33927	0.4731	0.99918	9501	1	0.025308	0.068565	0.982409	1394	3	1394
NOP2	4	0.11799	0.23898	0.99646	4810	2	0.025329	0.068616	0.982409	1395	1	1395
DVL2	4	0.56642	0.63449	0.999876	12724	1	0.025363	0.068688	0.982409	1396	3	1396
DPP3	4	0.87945	0.87935	0.999876	17645	0	0.02538	0.068724	0.982409	1397	3	1397
ADTRP	4	0.24133	0.3711	0.99918	7460	1	0.025427	0.068817	0.982409	1398	2	1398
DEXI	4	0.89774	0.8976	0.999876	18020	0	0.025444	0.068852	0.982409	1399	3	1399
ATP8B2	4	0.7681	0.7716	0.999876	15456	1	0.025481	0.068932	0.982409	1400	2	1400
SFXN1	4	0.011819	0.037649	0.97167	765	3	0.025532	0.06903	0.982409	1401	1	1401
GUK1	4	0.82659	0.82646	0.999876	16594	0	0.025583	0.069135	0.982409	1402	1	1402
DBI	4	0.45078	0.57523	0.999876	11519	1	0.025589	0.069142	0.982409	1403	2	1403
MAGOH	4	0.15803	0.28302	0.99646	5706	1	0.025612	0.069183	0.982409	1404	2	1404
CD209	4	0.89707	0.89691	0.999876	18006	0	0.025645	0.069252	0.982409	1405	2	1405
NonTargetingControl_80	1	0.97429	0.97425	0.999876	19539	0	0.025709	0.069391	0.982409	1406	1	1406
CXorf66	4	0.944	0.94388	0.999876	18926	0	0.025709	0.069392	0.982409	1407	2	1407
TM2D2	4	0.85624	0.85616	0.999876	17162	0	0.025787	0.06955	0.982409	1408	2	1408
KMT2A	4	0.95227	0.95214	0.999876	19086	0	0.02579	0.069558	0.982409	1409	3	1409
TRAF3	4	0.35275	0.4872	0.999404	9791	1	0.025822	0.069624	0.982409	1410	3	1410
HIST1H2AB	4	0.35107	0.48545	0.999404	9759	2	0.025838	0.069658	0.982409	1411	2	1411
PRKCI	4	0.55833	0.63003	0.999876	12615	1	0.025858	0.069694	0.982409	1412	3	1412
MKNK2	4	0.97412	0.97407	0.999876	19536	0	0.025877	0.069725	0.982409	1413	3	1413
HMG20A	4	0.90303	0.90286	0.999876	18122	0	0.025909	0.069794	0.982409	1414	2	1414
GALNT10	4	0.97402	0.97397	0.999876	19533	0	0.025983	0.06995	0.982409	1415	3	1415
GMNN	4	0.70814	0.72437	0.999876	14521	1	0.025996	0.06997	0.982409	1416	3	1416
SUPT4H1	4	0.9689	0.96877	0.999876	19430	0	0.026	0.069979	0.982409	1417	3	1417
NFATC2	4	0.34022	0.47408	0.99918	9515	1	0.026041	0.070062	0.982409	1418	3	1418
GNA15	4	0.82457	0.82448	0.999876	16554	0	0.026059	0.070096	0.982409	1419	3	1419
EML6	4	0.51012	0.6045	0.999876	12123	1	0.026091	0.070166	0.982409	1420	2	1420
PTPRU	4	0.34838	0.48271	0.99918	9708	2	0.026092	0.07017	0.982409	1421	1	1421
TMEM245	4	0.9237	0.92358	0.999876	18530	0	0.02611	0.070204	0.982409	1422	3	1422
EIF2B3	4	0.86249	0.86242	0.999876	17283	0	0.026119	0.070226	0.982409	1423	3	1423
KCNIP4	4	0.084567	0.18043	0.99646	3641	2	0.026128	0.070245	0.982409	1424	2	1424
RPL35	4	0.22106	0.34971	0.997888	7039	1	0.026141	0.070277	0.982409	1425	3	1425
HDAC9	4	0.022626	0.062073	0.97945	1273	1	0.026143	0.070279	0.982409	1426	1	1426
PEF1	4	0.26415	0.39502	0.99918	7941	2	0.026175	0.070359	0.982409	1427	2	1427
TVP23B	4	0.86912	0.86905	0.999876	17431	0	0.026185	0.070374	0.982409	1428	3	1428
DPP9-AS1	4	0.2051	0.33285	0.997888	6696	2	0.026194	0.070392	0.982409	1429	2	1429
TAF9	4	0.75452	0.76024	0.999876	15227	1	0.026221	0.070445	0.982409	1430	3	1430
C5orf22	4	0.073957	0.16129	0.992151	3263	2	0.026231	0.070463	0.982409	1431	2	1431
HTRA3	4	0.88907	0.88894	0.999876	17826	0	0.026231	0.070466	0.982409	1432	3	1432
MESP1	4	0.41857	0.55601	0.999876	11136	2	0.026245	0.070497	0.982409	1433	2	1433
MMP24	4	0.12616	0.24928	0.99646	5021	1	0.026282	0.070576	0.982409	1434	2	1434
CCL17	4	0.1542	0.27897	0.99646	5621	2	0.026296	0.070606	0.982409	1435	1	1435
RBL2	4	0.96547	0.96538	0.999876	19350	0	0.026305	0.07063	0.982409	1436	3	1436
P3H1	4	0.88039	0.88029	0.999876	17658	0	0.026315	0.070652	0.982409	1437	2	1437
ZNF189	4	0.80782	0.80779	0.999876	16207	1	0.026347	0.070723	0.982409	1438	2	1438
ESPNL	4	0.11357	0.23142	0.99646	4648	2	0.026423	0.070873	0.982409	1439	2	1439
SLC41A3	4	0.33809	0.47191	0.99918	9474	1	0.026434	0.070894	0.982409	1440	3	1440
UROD	4	0.13311	0.25676	0.99646	5177	2	0.026449	0.070919	0.982409	1441	1	1441
ZNF235	4	0.58659	0.64587	0.999876	12947	1	0.026473	0.070972	0.982409	1442	3	1442
EVA1C	4	0.79551	0.79608	0.999876	15981	1	0.0265	0.071023	0.982409	1443	2	1443
AAR2	4	0.4354	0.56802	0.999876	11369	1	0.026507	0.071037	0.982409	1444	2	1444
OR11H4	4	0.81637	0.8163	0.999876	16393	0	0.026508	0.071037	0.982409	1445	3	1445
PTGDS	4	0.75343	0.75938	0.999876	15211	1	0.02655	0.071128	0.982409	1446	3	1447
ELOVL1	4	0.69827	0.71718	0.999876	14374	1	0.026552	0.071128	0.982409	1447	3	1446
KIAA0100	4	0.31875	0.45182	0.99918	9078	1	0.026559	0.071143	0.982409	1448	2	1448
MPND	4	0.014331	0.044672	0.97167	907	1	0.026569	0.071168	0.982409	1449	3	1449
IFIT1	4	0.14421	0.2685	0.99646	5396	1	0.026601	0.071237	0.982409	1450	1	1450
TRNAU1AP	4	0.97318	0.97311	0.999876	19523	0	0.026606	0.071246	0.982409	1451	3	1451
ZNF354C	4	0.77873	0.78087	0.999876	15664	1	0.026658	0.071358	0.982409	1452	2	1452
OSBPL6	4	0.89337	0.89325	0.999876	17911	0	0.026703	0.071439	0.982409	1453	3	1453
PARP8	4	0.49529	0.59697	0.999876	11966	1	0.026754	0.071529	0.982409	1454	1	1454
TJAP1	4	0.29026	0.42231	0.99918	8482	2	0.026766	0.071554	0.982409	1455	2	1455
ANKRD11	4	0.71415	0.72884	0.999876	14615	1	0.026766	0.071554	0.982409	1456	2	1456
SLC39A6	4	0.73758	0.74669	0.999876	14955	1	0.026795	0.071615	0.982409	1457	3	1457
HBEGF	4	0.94082	0.94073	0.999876	18875	0	0.026806	0.071637	0.982409	1458	3	1458
LARP1	4	0.98113	0.9811	0.999876	19675	0	0.02682	0.071667	0.982409	1459	3	1459
CARNS1	4	0.78119	0.78311	0.999876	15704	1	0.026843	0.071701	0.982409	1460	3	1460
CFAP44	4	0.96467	0.96458	0.999876	19334	0	0.026852	0.071726	0.982409	1461	3	1461
SNRPB	4	0.75429	0.76005	0.999876	15224	1	0.026856	0.071731	0.982409	1462	2	1462
C18orf21	4	0.85485	0.85474	0.999876	17137	0	0.026861	0.071741	0.982409	1463	2	1463
LRRC8E	4	0.4167	0.55404	0.999876	11102	1	0.026907	0.071836	0.982409	1464	2	1464
GPATCH11	4	0.96759	0.96746	0.999876	19398	0	0.026957	0.071937	0.982409	1465	3	1465
CDH6	4	0.89779	0.89764	0.999876	18021	0	0.02696	0.071941	0.982409	1466	2	1466
SHFM1	4	0.98097	0.98096	0.999876	19672	0	0.026966	0.071959	0.982409	1467	3	1467
SFTA3	4	0.46112	0.58023	0.999876	11623	1	0.026979	0.071987	0.982409	1468	3	1468
MTX1	4	0.030619	0.078551	0.982438	1598	2	0.027008	0.072041	0.982409	1469	2	1469
FREM1	4	0.96807	0.96796	0.999876	19417	0	0.027022	0.072071	0.982409	1470	2	1470
UBAP2L	4	0.78795	0.78909	0.999876	15839	1	0.027031	0.072096	0.982409	1471	3	1471
HHIPL2	4	0.90847	0.90829	0.999876	18218	0	0.027059	0.072158	0.982409	1472	1	1472
CCDC78	4	0.052893	0.12197	0.982438	2489	1	0.02711	0.072259	0.982409	1473	2	1473
NAPA	4	0.59526	0.65087	0.999876	13043	1	0.027135	0.072311	0.982409	1474	2	1474
NonTargetingControl_793	1	0.97286	0.97282	0.999876	19513	0	0.027137	0.072316	0.982409	1475	1	1475
HINFP	4	0.71295	0.72794	0.999876	14597	1	0.027161	0.072363	0.982409	1476	2	1476
TRPM1	4	0.91859	0.9184	0.999876	18435	0	0.027207	0.072459	0.982409	1477	2	1477
FBXL2	4	0.53994	0.62005	0.999876	12433	1	0.027212	0.07247	0.982409	1478	2	1478
TMEM91	4	0.66403	0.69346	0.999876	13902	1	0.027217	0.072484	0.982409	1479	3	1479
PKD1L1	4	0.11688	0.2371	0.99646	4771	2	0.027235	0.07252	0.982409	1480	2	1480
ZNF195	4	0.85068	0.85057	0.999876	17066	0	0.027263	0.072578	0.982409	1481	2	1481
CCL2	4	0.17479	0.30091	0.99646	6060	2	0.027278	0.072609	0.982409	1482	2	1482
KLHL35	4	0.079471	0.17138	0.992253	3465	2	0.027314	0.072689	0.982409	1483	1	1483
HIST1H1T	4	0.25778	0.38838	0.99918	7812	2	0.027364	0.072786	0.982409	1484	2	1484
ZNF467	4	0.73866	0.74751	0.999876	14967	1	0.027367	0.072794	0.982409	1485	3	1485
MAGED4B	4	0.085865	0.1828	0.99646	3678	3	0.027415	0.07289	0.982409	1486	1	1486
ADNP	4	0.6356	0.67527	0.999876	13540	1	0.027452	0.072968	0.982409	1487	3	1487
ZNF169	4	0.9409	0.9408	0.999876	18877	0	0.027452	0.072968	0.982409	1488	3	1488
B3GALT2	4	0.975	0.97493	0.999876	19547	0	0.027478	0.073025	0.982409	1489	3	1489
LAMB1	4	0.45156	0.57559	0.999876	11525	1	0.027517	0.073095	0.982409	1490	2	1490
AGTR1	4	0.69413	0.7142	0.999876	14317	1	0.027533	0.073132	0.982409	1491	3	1491
SF1	4	0.76523	0.7691	0.999876	15402	1	0.027545	0.073159	0.982409	1492	3	1492
UPK1A	4	0.38445	0.52015	0.999876	10442	1	0.027568	0.073211	0.982409	1493	1	1493
NonTargetingControl_450	1	0.9724	0.97234	0.999876	19500	0	0.027604	0.07328	0.982409	1494	1	1494
NAA20	4	0.49838	0.5985	0.999876	11994	1	0.027613	0.0733	0.982409	1495	3	1495
SYN3	4	0.37917	0.51465	0.999876	10335	2	0.027619	0.07331	0.982409	1496	1	1496
PRRT1	4	0.98304	0.98301	0.999876	19710	0	0.027626	0.073323	0.982409	1497	3	1497
CEP72	4	0.058935	0.13339	0.985594	2721	1	0.02766	0.073391	0.982409	1498	2	1498
SIX6	4	0.22316	0.35193	0.997888	7080	1	0.027669	0.073407	0.982409	1499	2	1499
EEF2	4	0.65564	0.688	0.999876	13803	1	0.027713	0.073505	0.982409	1500	2	1500
ACP1	4	0.7922	0.79302	0.999876	15925	1	0.02772	0.073518	0.982409	1501	2	1501
PTBP2	4	0.81956	0.81951	0.999876	16453	0	0.027771	0.073614	0.982409	1502	1	1502
TMSB15B	4	0.3463	0.48053	0.99918	9642	2	0.027822	0.073705	0.982409	1503	2	1503
WDR6	4	0.92923	0.92916	0.999876	18640	0	0.027873	0.073812	0.982409	1504	3	1504
TMCC3	4	0.91241	0.91223	0.999876	18302	0	0.027924	0.073909	0.982409	1505	3	1505
PHF12	4	0.17055	0.29639	0.99646	5956	2	0.027924	0.07391	0.982409	1506	2	1506
METTL9	4	0.77174	0.77471	0.999876	15535	1	0.027943	0.073948	0.982409	1507	3	1507
TMEM98	4	0.93984	0.93975	0.999876	18858	0	0.027962	0.073988	0.982409	1508	2	1508
USO1	4	0.8252	0.82511	0.999876	16568	0	0.027975	0.074012	0.982409	1509	2	1509
HTATSF1	4	0.45215	0.57586	0.999876	11532	1	0.027977	0.074022	0.982409	1510	2	1510
SEZ6L2	4	0.45506	0.57726	0.999876	11560	1	0.027982	0.074031	0.982409	1511	3	1511
CD37	4	0.30384	0.43643	0.99918	8768	1	0.028007	0.074081	0.982409	1512	3	1512
C10orf67	4	0.97087	0.97078	0.999876	19471	0	0.028007	0.074081	0.982409	1513	3	1513
DBP	4	0.76066	0.76531	0.999876	15336	1	0.02802	0.074108	0.982409	1514	2	1514
C4A	4	0.58669	0.64593	0.999876	12950	1	0.028083	0.074237	0.982409	1515	2	1515
OR1A2	4	0.35299	0.48746	0.999404	9798	1	0.028094	0.074261	0.982409	1517	3	1516
CCNJ	4	0.75501	0.76065	0.999876	15237	1	0.028094	0.074261	0.982409	1516	3	1517
ARNTL	4	0.68247	0.70602	0.999876	14165	1	0.028112	0.074291	0.982409	1518	3	1518
C16orf74	4	0.086589	0.18412	0.99646	3704	2	0.028127	0.074321	0.982409	1519	1	1519
PALD1	4	0.31719	0.45021	0.99918	9039	1	0.028142	0.074342	0.982409	1520	3	1520
OR5K2	4	0.90256	0.9024	0.999876	18111	0	0.028152	0.074356	0.982409	1521	3	1521
PHYHIP	4	0.76599	0.76975	0.999876	15420	1	0.028178	0.074413	0.982409	1522	3	1522
NUP50	4	0.93632	0.93628	0.999876	18789	0	0.028179	0.074415	0.982409	1523	3	1523
NonTargetingControl_707	1	0.97168	0.97159	0.999876	19484	0	0.028318	0.074689	0.982409	1524	1	1524
SPAG6	4	0.20908	0.3371	0.997888	6786	1	0.02833	0.074715	0.982409	1525	2	1525
ZNF703	4	0.95158	0.95145	0.999876	19069	0	0.028351	0.074758	0.982409	1526	3	1526
LCE2D	4	0.36639	0.5014	0.999876	10075	1	0.028353	0.074762	0.982409	1527	2	1527
NonTargetingControl_636	1	0.97158	0.97148	0.999876	19480	0	0.028416	0.074892	0.982409	1528	1	1528
YIPF5	4	0.07184	0.15738	0.992151	3185	2	0.028432	0.07492	0.982409	1529	1	1529
JADE2	4	0.11376	0.23173	0.99646	4655	1	0.02844	0.074935	0.982409	1530	2	1530
ZBTB20	4	0.8586	0.8585	0.999876	17211	0	0.028446	0.07495	0.982409	1531	3	1531
FCRL2	4	0.94364	0.94352	0.999876	18923	0	0.028483	0.075012	0.982409	1532	1	1532
PIK3R2	4	0.56768	0.63519	0.999876	12738	1	0.028534	0.075121	0.982409	1533	2	1533
SLC50A1	4	0.81495	0.8149	0.999876	16363	0	0.028549	0.075152	0.982409	1534	3	1534
RSAD1	4	0.03497	0.087162	0.982438	1771	1	0.028559	0.075173	0.982409	1535	3	1535
BARHL1	4	0.10016	0.20809	0.99646	4182	1	0.028605	0.075274	0.982409	1536	3	1536
LGMN	4	0.41041	0.54742	0.999876	10977	2	0.02861	0.075282	0.982409	1537	2	1537
IZUMO2	4	0.41235	0.54946	0.999876	11016	2	0.02861	0.075282	0.982409	1538	2	1538
PPEF2	4	0.079331	0.17111	0.992253	3461	1	0.02861	0.075283	0.982409	1541	2	1539
IL36G	4	0.11456	0.2331	0.99646	4685	2	0.02861	0.075283	0.982409	1539	2	1540
UGT3A1	4	0.18045	0.30686	0.99646	6191	2	0.02861	0.075283	0.982409	1540	2	1541
RNF4	4	0.96599	0.96589	0.999876	19358	0	0.028646	0.075363	0.982409	1542	3	1542
SLCO1A2	4	0.61044	0.65986	0.999876	13239	1	0.028649	0.075371	0.982409	1543	3	1543
PPIAL4E	4	0.5002	0.59945	0.999876	12017	1	0.028686	0.075451	0.982818	1544	1	1544
CEP131	4	0.014268	0.044536	0.97167	904	3	0.028737	0.075557	0.983559	1545	1	1545
GTF3C3	4	0.12807	0.25133	0.99646	5070	2	0.028785	0.075652	0.983625	1546	2	1546
FUS	4	0.70125	0.71934	0.999876	14423	1	0.028788	0.07566	0.983625	1547	1	1547
KLF1	4	0.83306	0.83289	0.999876	16711	0	0.028834	0.07575	0.98416	1548	2	1548
SLC25A2	4	0.93228	0.93222	0.999876	18717	0	0.028889	0.075862	0.984681	1549	2	1549
OR2W1	4	0.96146	0.96135	0.999876	19273	0	0.02891	0.075894	0.984681	1550	3	1550
ENOSF1	4	0.65581	0.6881	0.999876	13806	1	0.028966	0.075999	0.984681	1551	2	1551
PCOLCE2	4	0.84659	0.84645	0.999876	16983	0	0.028991	0.076044	0.984681	1552	2	1552
EIF5	4	0.97759	0.97749	0.999876	19604	0	0.029035	0.076127	0.984681	1553	2	1553
BAG2	4	0.6935	0.71373	0.999876	14310	1	0.029037	0.076132	0.984681	1554	3	1554
SNX27	4	0.47362	0.58623	0.999876	11764	1	0.029042	0.076143	0.984681	1555	2	1555
ATP8B1	4	0.20797	0.33591	0.997888	6765	1	0.02906	0.076182	0.984681	1556	3	1556
RTP4	4	0.7953	0.79589	0.999876	15977	1	0.029092	0.076262	0.984713	1557	2	1557
HRC	4	0.58514	0.64503	0.999876	12930	1	0.029103	0.076282	0.984713	1558	3	1558
TREML4	4	0.61307	0.6614	0.999876	13270	1	0.029143	0.076362	0.98511	1559	2	1559
OR10V1	4	0.97073	0.97063	0.999876	19467	0	0.029267	0.076609	0.987441	1560	3	1560
MBNL1	4	0.9517	0.95157	0.999876	19074	0	0.029383	0.076837	0.987441	1561	3	1561
MAP3K6	4	0.98157	0.98155	0.999876	19683	0	0.029422	0.076916	0.987441	1562	3	1562
CFAP36	4	0.82091	0.82087	0.999876	16475	0	0.029443	0.07696	0.987441	1563	3	1563
ACSL5	4	0.97925	0.97918	0.999876	19640	0	0.029477	0.077028	0.987441	1564	3	1564
ZNF555	4	0.62173	0.66666	0.999876	13357	1	0.029488	0.077057	0.987441	1565	3	1565
RUNX1T1	4	0.56104	0.63152	0.999876	12644	1	0.029499	0.077078	0.987441	1566	2	1566
NonTargetingControl_583	1	0.97046	0.97036	0.999876	19462	0	0.029539	0.077158	0.987441	1567	1	1567
NEIL3	4	0.33905	0.47288	0.99918	9496	2	0.02955	0.077179	0.987441	1568	2	1568
ANXA5	4	0.5449	0.62267	0.999876	12477	1	0.029558	0.077194	0.987441	1569	3	1569
C15orf38-AP3S2	4	0.98013	0.9801	0.999876	19658	0	0.029579	0.077232	0.987441	1570	3	1570
FKBP10	4	0.79339	0.79411	0.999876	15944	1	0.0296	0.077266	0.987441	1571	2	1571
FGF21	4	0.91134	0.91116	0.999876	18277	0	0.029619	0.077302	0.987441	1572	3	1572
ADAMTS1	4	0.73267	0.74285	0.999876	14881	1	0.029629	0.077326	0.987441	1573	3	1573
ABHD16A	4	0.54563	0.62307	0.999876	12485	1	0.029643	0.077357	0.987441	1574	3	1574
TSEN2	4	0.11125	0.2274	0.99646	4570	2	0.029651	0.077373	0.987441	1575	1	1575
PLD1	4	0.035627	0.088478	0.982438	1797	1	0.029669	0.077413	0.987441	1576	3	1576
ZNF554	4	0.9427	0.94258	0.999876	18903	0	0.029702	0.077462	0.987441	1577	2	1577
HIBADH	4	0.92752	0.92747	0.999876	18603	0	0.029752	0.077572	0.987441	1578	1	1578
PLA2R1	4	0.92991	0.92985	0.999876	18657	0	0.029761	0.077585	0.987441	1579	3	1579
CYP4F8	4	0.22194	0.35066	0.997888	7060	1	0.029763	0.077589	0.987441	1580	2	1580
AHCY	4	0.63282	0.67349	0.999876	13494	1	0.029777	0.077622	0.987441	1581	3	1581
ZBTB7C	4	0.92543	0.92528	0.999876	18558	0	0.029812	0.0777	0.987464	1582	3	1582
OR8J3	4	0.48794	0.59331	0.999876	11910	1	0.029837	0.077741	0.987464	1583	2	1583
MRGPRE	4	0.97986	0.9798	0.999876	19651	0	0.029851	0.077772	0.987464	1584	3	1584
CLCNKA	4	0.53922	0.61966	0.999876	12427	1	0.029936	0.077941	0.988399	1585	2	1585
DUPD1	4	0.46906	0.58398	0.999876	11709	1	0.029955	0.07798	0.988399	1586	2	1586
PCDH15	4	0.7275	0.73889	0.999876	14807	1	0.029962	0.077993	0.988399	1587	3	1587
TRIM77	4	0.26188	0.39266	0.99918	7892	1	0.03004	0.078152	0.988421	1588	2	1588
RAB42	4	0.018789	0.05408	0.97167	1116	2	0.030057	0.078183	0.988421	1589	1	1589
MCEE	4	0.58253	0.64351	0.999876	12901	1	0.030062	0.078196	0.988421	1590	3	1590
APOBEC3C	4	0.86862	0.86855	0.999876	17423	0	0.0301	0.078276	0.988421	1591	2	1591
TFAP2C	4	0.083764	0.179	0.996046	3614	2	0.030108	0.078289	0.988421	1592	1	1592
ATXN2L	4	0.38232	0.51795	0.999876	10394	1	0.030163	0.078399	0.988421	1593	3	1593
MAOA	4	0.51867	0.60899	0.999876	12212	1	0.030164	0.0784	0.988421	1594	2	1594
NCAPD3	4	0.90686	0.90663	0.999876	18194	0	0.030174	0.07842	0.988421	1595	3	1595
TXNDC16	4	0.9202	0.92003	0.999876	18461	0	0.030209	0.078493	0.988421	1596	2	1596
NEB	4	0.94525	0.94509	0.999876	18953	0	0.03026	0.078603	0.988421	1597	2	1597
ARMCX1	4	0.68766	0.70963	0.999876	14233	1	0.030284	0.078663	0.988421	1598	2	1598
GNL2	4	0.030284	0.07786	0.982438	1579	2	0.030289	0.078674	0.988421	1600	2	1599
TMEM30A	4	0.066477	0.14751	0.991047	2989	2	0.030289	0.078674	0.988421	1599	2	1600
ADAMTS14	4	0.40682	0.54365	0.999876	10904	2	0.030319	0.07873	0.988421	1601	2	1601
EPX	4	0.84511	0.84495	0.999876	16953	0	0.030361	0.078821	0.988421	1602	1	1602
RPL34	4	0.22215	0.35087	0.997888	7063	1	0.030412	0.078933	0.988421	1603	3	1603
OTUD6B	4	0.5964	0.65154	0.999876	13062	1	0.030462	0.079029	0.988421	1604	3	1604
TIA1	4	0.96175	0.96165	0.999876	19280	0	0.030509	0.079136	0.988421	1605	2	1605
NOTCH3	4	0.008669	0.028161	0.97167	565	1	0.030514	0.079146	0.988421	1606	2	1606
ZNF836	4	0.10404	0.21485	0.99646	4319	1	0.030534	0.079185	0.988421	1607	2	1607
NTM	4	0.9378	0.93772	0.999876	18820	0	0.030564	0.079242	0.988421	1608	2	1608
SPATA13	4	0.46062	0.57999	0.999876	11618	1	0.030579	0.079274	0.988421	1609	2	1609
RHOXF2B	4	0.60126	0.65437	0.999876	13125	1	0.030595	0.079315	0.988421	1610	3	1610
CLU	4	0.8564	0.85633	0.999876	17166	0	0.030666	0.079455	0.988421	1611	3	1611
SPINK6	4	0.94533	0.94517	0.999876	18954	0	0.030716	0.079564	0.988421	1612	2	1612
KLK1	4	0.98002	0.97998	0.999876	19653	0	0.030722	0.079574	0.988421	1613	3	1613
FKBP3	4	0.22477	0.35365	0.997888	7112	1	0.030767	0.079675	0.988421	1614	2	1614
MEF2B	4	0.94363	0.94351	0.999876	18922	0	0.03077	0.079686	0.988421	1615	3	1615
RPF2	4	0.23658	0.36613	0.99918	7363	2	0.030818	0.079785	0.988421	1616	2	1616
LARP4	4	0.69489	0.71471	0.999876	14329	1	0.030834	0.079826	0.988421	1617	3	1617
TTC30A	4	0.21918	0.34776	0.997888	6996	2	0.030869	0.079902	0.988421	1618	2	1618
INSR	4	0.97091	0.97082	0.999876	19473	0	0.030886	0.079928	0.988421	1619	3	1619
SEPT10	4	0.047525	0.11176	0.982438	2268	3	0.030919	0.079991	0.988421	1620	1	1620
SUMO2	4	0.077035	0.16697	0.992151	3377	2	0.030995	0.080138	0.988421	1621	2	1621
SBDS	4	0.5129	0.60595	0.999876	12149	1	0.031031	0.080217	0.988421	1622	3	1622
BTK	4	0.91407	0.91387	0.999876	18335	0	0.031072	0.080301	0.988421	1623	2	1623
OGDH	4	0.93433	0.9343	0.999876	18754	0	0.031081	0.080319	0.988421	1624	2	1624
FAF1	4	0.36772	0.50279	0.999876	10100	1	0.031121	0.080394	0.988421	1625	3	1625
DES	4	0.70846	0.72461	0.999876	14525	1	0.031122	0.080396	0.988421	1626	1	1626
TNIK	4	0.84857	0.84844	0.999876	17022	0	0.031132	0.080408	0.988421	1627	3	1627
CA10	4	0.57114	0.63715	0.999876	12779	1	0.031173	0.080505	0.988421	1628	2	1628
KCTD8	4	0.95473	0.95456	0.999876	19145	0	0.031191	0.080542	0.988421	1629	3	1629
EBLN2	4	0.79666	0.79716	0.999876	16004	1	0.031197	0.080556	0.988421	1630	2	1630
ABCD4	4	0.72048	0.73357	0.999876	14704	1	0.031224	0.080609	0.988421	1631	3	1631
AOAH	4	0.65965	0.69061	0.999876	13853	1	0.031274	0.080704	0.988421	1632	1	1632
CLDN18	4	0.49992	0.5993	0.999876	12013	1	0.031293	0.080733	0.988421	1633	2	1633
CLDN6	4	0.95492	0.95475	0.999876	19150	0	0.031322	0.080789	0.988421	1634	3	1634
UNC5C	4	0.23837	0.36799	0.99918	7393	2	0.031324	0.080792	0.988421	1635	2	1635
CCDC96	4	0.88229	0.88222	0.999876	17699	0	0.031325	0.080797	0.988421	1636	2	1636
SYT16	4	0.85491	0.8548	0.999876	17140	0	0.031352	0.080848	0.988421	1637	3	1637
EOMES	4	0.095974	0.20062	0.99646	4032	3	0.031376	0.08089	0.988421	1638	1	1638
SIGLEC8	4	0.85211	0.85197	0.999876	17096	0	0.031384	0.080906	0.988421	1639	3	1639
SDF2L1	4	0.15204	0.27676	0.99646	5566	1	0.031398	0.080939	0.988421	1640	3	1640
CTNND2	4	0.031907	0.081124	0.982438	1645	3	0.031426	0.080995	0.988421	1641	1	1641
SLFN5	4	0.28814	0.42011	0.99918	8438	2	0.031477	0.08109	0.988421	1642	2	1642
CGNL1	4	0.93482	0.9348	0.999876	18767	0	0.031485	0.081103	0.988421	1643	3	1643
CACNA2D1	4	0.41002	0.547	0.999876	10968	1	0.03151	0.081149	0.988421	1644	3	1644
CCL24	4	0.95527	0.95512	0.999876	19159	0	0.031573	0.081283	0.988421	1645	3	1645
ZNF655	4	0.37381	0.50909	0.999876	10221	1	0.031579	0.081296	0.988421	1646	2	1646
XRCC6BP1	4	0.94758	0.94742	0.999876	19002	0	0.031709	0.081542	0.988421	1647	3	1647
NANOGNB	4	0.94918	0.94903	0.999876	19028	0	0.031731	0.081585	0.988421	1648	2	1648
GOLGA8N	4	0.29625	0.42859	0.99918	8607	1	0.031735	0.081593	0.988421	1649	3	1649
ATXN7L2	4	0.49694	0.59777	0.999876	11985	1	0.031789	0.081704	0.988421	1650	3	1650
FAM71D	4	0.8786	0.8785	0.999876	17632	0	0.031883	0.081898	0.988421	1651	3	1651
KRT28	4	0.11494	0.23378	0.99646	4699	1	0.031915	0.081962	0.988421	1652	3	1652
EBAG9	4	0.76247	0.76682	0.999876	15366	1	0.031918	0.081971	0.988421	1653	2	1653
KCNU1	4	0.43727	0.56886	0.999876	11393	1	0.031919	0.081973	0.988421	1654	1	1654
PRR20D	4	0.57527	0.6395	0.999876	12822	1	0.031929	0.08199	0.988421	1655	3	1655
TTBK2	4	0.38912	0.525	0.999876	10535	2	0.031933	0.081995	0.988421	1656	2	1656
SERTAD3	4	0.66631	0.695	0.999876	13936	1	0.032015	0.082156	0.988421	1657	2	1657
VRK2	4	0.82373	0.82366	0.999876	16536	0	0.032028	0.082178	0.988421	1658	3	1658
MTR	4	0.14125	0.26537	0.99646	5342	2	0.032035	0.08219	0.988421	1659	1	1659
FGR	4	0.51542	0.60729	0.999876	12177	1	0.032076	0.082279	0.988421	1660	2	1660
FAM169A	4	0.45269	0.57613	0.999876	11539	1	0.032081	0.082287	0.988421	1661	2	1661
USP15	4	0.39272	0.52885	0.999876	10606	2	0.032085	0.082298	0.988421	1662	1	1662
SLC35B4	4	0.97105	0.97096	0.999876	19476	0	0.032119	0.08236	0.988421	1663	3	1663
OR1M1	4	0.67079	0.69797	0.999876	14004	1	0.032136	0.082395	0.988421	1664	1	1664
LLPH	4	0.63837	0.67697	0.999876	13576	1	0.032187	0.082497	0.988421	1665	1	1665
NXF2	4	0.5024	0.60057	0.999876	12042	1	0.032188	0.082501	0.988421	1666	3	1666
ARHGAP15	4	0.61777	0.66422	0.999876	13319	1	0.032237	0.082601	0.988421	1667	2	1667
C2orf48	4	0.22571	0.35465	0.997888	7134	2	0.032288	0.082702	0.988421	1668	2	1668
CEP295NL	4	0.91666	0.91647	0.999876	18392	0	0.03231	0.082743	0.988421	1669	3	1669
MED27	4	0.75272	0.75881	0.999876	15196	1	0.032312	0.082746	0.988421	1670	3	1670
AGO1	4	0.85218	0.85205	0.999876	17097	0	0.032339	0.082804	0.988421	1671	2	1671
DUSP12	4	0.75951	0.76433	0.999876	15318	1	0.032415	0.082957	0.988421	1672	2	1672
TSPAN2	4	0.011052	0.035338	0.97167	718	2	0.03244	0.083009	0.988421	1673	1	1673
KLHDC1	4	0.93433	0.9343	0.999876	18753	0	0.032449	0.083029	0.988421	1674	3	1674
FEN1	4	0.64946	0.68405	0.999876	13714	1	0.032471	0.083074	0.988421	1675	2	1675
MAU2	4	0.94625	0.94607	0.999876	18974	0	0.032538	0.083199	0.988421	1676	2	1676
MYL2	4	0.90935	0.90919	0.999876	18236	0	0.032558	0.08324	0.988421	1677	3	1677
NXPE2	4	0.002205	0.0076012	0.904696	168	1	0.032579	0.08328	0.988421	1678	2	1678
ANKRD9	4	0.058231	0.1321	0.98379	2697	2	0.032592	0.083299	0.988421	1679	2	1679
DUOX2	4	0.76968	0.77294	0.999876	15484	1	0.032608	0.083333	0.988421	1680	3	1680
PSMA7	4	0.90991	0.90973	0.999876	18243	0	0.032631	0.083383	0.988421	1681	3	1681
GAN	4	0.010399	0.033368	0.97167	678	3	0.032643	0.083409	0.988421	1682	1	1682
SLC41A1	4	0.82623	0.8261	0.999876	16588	0	0.032739	0.083595	0.988421	1683	3	1683
LCE3B	4	0.19515	0.32243	0.997888	6476	2	0.032754	0.083621	0.988421	1684	2	1684
ARSH	4	0.2979	0.43034	0.99918	8636	2	0.032794	0.083706	0.988421	1685	1	1685
EEF1A1	4	0.82961	0.82948	0.999876	16652	0	0.032821	0.083769	0.988421	1686	2	1686
PLOD2	4	0.38235	0.51798	0.999876	10396	1	0.032845	0.083811	0.988421	1687	2	1687
SMN2	4	0.048148	0.11293	0.982438	2292	1	0.032848	0.083818	0.988421	1688	3	1688
VIPR2	4	0.27149	0.40268	0.99918	8080	1	0.032896	0.083916	0.988421	1689	3	1689
IL17C	4	0.30309	0.43569	0.99918	8754	2	0.032896	0.083916	0.988421	1690	2	1690
UBL7	4	0.21914	0.34771	0.997888	6994	1	0.032915	0.083951	0.988421	1691	3	1691
SPATA24	4	0.20963	0.33771	0.997888	6795	1	0.03294	0.083996	0.988421	1692	2	1692
CDHR1	4	0.17932	0.30565	0.99646	6166	1	0.032972	0.084054	0.988421	1693	2	1693
DNAJC19	4	0.91787	0.91765	0.999876	18420	0	0.032972	0.084054	0.988421	1694	3	1694
USP17L28	4	0.57371	0.63861	0.999876	12807	1	0.032992	0.084082	0.988421	1695	2	1695
GOLGA6D	4	0.5155	0.60733	0.999876	12179	1	0.033044	0.084185	0.988421	1696	3	1696
SMARCAL1	4	0.21304	0.34132	0.997888	6871	2	0.033048	0.084194	0.988421	1697	2	1697
LYRM4	4	0.96693	0.96683	0.999876	19381	0	0.033069	0.084236	0.988421	1698	3	1698
ATP5L	4	0.63713	0.6762	0.999876	13564	1	0.033098	0.084289	0.988421	1699	3	1699
SLC22A5	4	0.96184	0.96174	0.999876	19282	0	0.033122	0.08434	0.988421	1700	3	1700
FMNL2	4	0.33449	0.4682	0.99918	9401	2	0.033149	0.084393	0.988421	1701	1	1701
RBM27	4	0.65694	0.68882	0.999876	13816	1	0.0332	0.084489	0.988421	1702	2	1702
SMIM18	4	0.90738	0.90717	0.999876	18204	0	0.03325	0.084586	0.988421	1703	2	1703
TAS2R40	4	0.36017	0.49494	0.999876	9946	1	0.033272	0.084635	0.988421	1704	2	1704
PLD5	4	0.8913	0.89123	0.999876	17867	0	0.033301	0.084699	0.988421	1705	2	1705
OR2K2	4	0.7292	0.74019	0.999876	14835	1	0.033351	0.084798	0.988421	1706	1	1706
C9orf62	4	0.4875	0.59308	0.999876	11906	1	0.033376	0.084849	0.988421	1707	3	1707
C8orf88	4	0.52595	0.6127	0.999876	12286	1	0.033453	0.085006	0.988421	1708	2	1708
PGLS	4	0.29135	0.42345	0.99918	8510	1	0.033454	0.085009	0.988421	1709	3	1709
PAGR1	4	0.18057	0.307	0.99646	6196	1	0.033503	0.085096	0.988421	1710	1	1710
NonTargetingControl_872	1	0.96649	0.9664	0.999876	19372	0	0.033511	0.085112	0.988421	1711	1	1711
HNRNPAB	4	0.98006	0.98002	0.999876	19655	0	0.033511	0.085113	0.988421	1712	3	1712
MT1HL1	4	0.85629	0.85622	0.999876	17163	0	0.033519	0.085128	0.988421	1713	3	1713
LRRTM1	4	0.1045	0.21563	0.99646	4336	1	0.033554	0.085202	0.988421	1714	2	1714
C9orf173	4	0.95234	0.95221	0.999876	19088	0	0.033575	0.085242	0.988421	1715	3	1715
PABPN1	4	0.51822	0.60877	0.999876	12208	1	0.033605	0.085291	0.988421	1716	2	1716
FAM19A4	4	0.3349	0.46864	0.99918	9409	2	0.033605	0.085294	0.988421	1717	2	1717
AOC2	4	0.91584	0.91565	0.999876	18370	0	0.033621	0.085327	0.988421	1718	3	1718
C15orf56	4	0.87742	0.8773	0.999876	17605	0	0.033646	0.08537	0.988421	1719	3	1719
NME7	4	0.33626	0.47004	0.99918	9431	2	0.033655	0.085389	0.988421	1720	2	1720
VPS72	4	0.93295	0.93288	0.999876	18726	0	0.033689	0.08545	0.988421	1721	2	1721
CDA	4	0.03795	0.09309	0.982438	1880	2	0.033699	0.085475	0.988421	1722	2	1722
NPRL2	4	0.63999	0.67799	0.999876	13596	1	0.033706	0.085488	0.988421	1723	2	1723
PDK1	4	0.033655	0.084566	0.982438	1712	1	0.033712	0.085492	0.988421	1724	3	1724
CCDC36	4	0.24095	0.37071	0.99918	7452	2	0.033731	0.085529	0.988421	1725	2	1725
GPRC5B	4	0.058116	0.13187	0.98379	2695	1	0.033752	0.085574	0.988421	1726	3	1726
IRGQ	4	0.10057	0.20878	0.99646	4196	1	0.033756	0.085582	0.988421	1727	2	1727
RBM42	4	0.4596	0.57949	0.999876	11605	1	0.033757	0.085583	0.988421	1728	3	1728
BBS1	4	0.89098	0.89089	0.999876	17861	0	0.033774	0.085619	0.988421	1729	3	1729
FIBCD1	4	0.018713	0.053911	0.97167	1110	3	0.033807	0.085683	0.988421	1730	1	1730
NCOA1	4	0.67055	0.6978	0.999876	14000	1	0.033846	0.085771	0.988421	1731	2	1731
SLC6A12	4	0.10793	0.22159	0.99646	4457	1	0.033858	0.085793	0.988421	1732	2	1732
TIAM2	4	0.97243	0.97237	0.999876	19502	0	0.033877	0.085824	0.988421	1733	3	1733
PSORS1C2	4	0.10444	0.21554	0.99646	4335	3	0.033908	0.085887	0.988421	1734	1	1734
OR5B21	4	0.71758	0.73138	0.999876	14666	1	0.033945	0.085971	0.988421	1735	2	1735
POLR3B	4	0.78638	0.78768	0.999876	15798	1	0.033961	0.086002	0.988421	1736	3	1736
SCML4	4	0.72113	0.73407	0.999876	14710	1	0.033982	0.086052	0.988421	1737	3	1737
SAMD15	4	0.44743	0.57366	0.999876	11489	1	0.034009	0.086105	0.988421	1738	1	1738
TMOD3	4	0.94807	0.94791	0.999876	19009	0	0.03406	0.086194	0.988421	1739	2	1739
SLC25A36	4	0.91128	0.9111	0.999876	18274	0	0.03414	0.086361	0.988421	1740	3	1740
FRRS1	4	0.089627	0.18951	0.99646	3815	3	0.034161	0.086398	0.988421	1741	1	1741
OR4M1	4	0.19225	0.31934	0.997888	6422	2	0.034212	0.086491	0.988421	1742	1	1742
RRAGA	4	0.50772	0.60328	0.999876	12098	1	0.034232	0.086536	0.988421	1743	3	1743
TCEANC2	4	0.081327	0.1747	0.992253	3541	2	0.034313	0.086696	0.988421	1744	2	1744
MAPK4	4	0.26348	0.39433	0.99918	7929	2	0.034313	0.086696	0.988421	1745	2	1745
VWA7	4	0.1535	0.27825	0.99646	5605	2	0.034345	0.08676	0.988421	1746	2	1746
OR5R1	4	0.4252	0.56298	0.999876	11278	1	0.03436	0.086787	0.988421	1747	3	1747
PHPT1	4	0.23243	0.36177	0.99918	7273	2	0.034363	0.086796	0.988421	1748	2	1748
ZNF256	4	0.96507	0.96495	0.999876	19345	0	0.034379	0.086829	0.988421	1749	3	1749
ZFP2	4	0.77752	0.77981	0.999876	15636	1	0.034403	0.08688	0.988421	1750	2	1750
HIST1H2BK	4	0.978	0.97788	0.999876	19613	0	0.03441	0.086892	0.988421	1751	3	1751
MS4A5	4	0.19255	0.31967	0.997888	6428	2	0.034414	0.086897	0.988421	1752	1	1752
LOC101060389	4	0.57874	0.64138	0.999876	12860	1	0.034416	0.086904	0.988421	1753	3	1753
CYTH3	4	0.21165	0.33982	0.997888	6842	1	0.034436	0.086945	0.988421	1755	3	1754
GPX4	4	0.69523	0.71496	0.999876	14334	1	0.034436	0.086945	0.988421	1754	3	1755
DLG3	4	0.24699	0.37705	0.99918	7583	1	0.034465	0.086999	0.988421	1756	1	1756
TMCC2	4	0.86264	0.86257	0.999876	17286	0	0.034477	0.087027	0.988421	1757	3	1757
CLEC9A	4	0.83807	0.8379	0.999876	16819	0	0.034491	0.08706	0.988421	1758	3	1758
MAGEC3	4	0.17131	0.29722	0.99646	5972	2	0.034492	0.087064	0.988421	1759	2	1759
VPS35	4	0.82562	0.82552	0.999876	16578	0	0.034511	0.087099	0.988421	1760	3	1760
RGS20	4	0.77524	0.77782	0.999876	15605	1	0.034566	0.087198	0.988421	1761	2	1761
LTV1	4	0.22183	0.35055	0.997888	7057	1	0.034566	0.0872	0.988421	1762	3	1762
ERG	4	0.35615	0.49074	0.999404	9872	1	0.034582	0.087224	0.988421	1763	2	1763
KIAA0040	4	0.089264	0.18889	0.99646	3803	2	0.034616	0.087284	0.988421	1764	1	1764
LDLRAD3	4	0.044339	0.1056	0.982438	2139	2	0.034624	0.087301	0.988421	1765	2	1765
CDCP1	4	0.83637	0.83617	0.999876	16784	0	0.03463	0.08731	0.988421	1766	3	1766
C1orf226	4	0.65999	0.69083	0.999876	13861	1	0.034656	0.087365	0.988421	1767	3	1767
SLC6A8	4	0.9845	0.98452	0.999876	19734	0	0.034667	0.087387	0.988421	1768	3	1768
NDUFAF2	4	0.83937	0.83918	0.999876	16844	0	0.034688	0.087423	0.988421	1769	3	1769
PABPC1	4	0.72109	0.73405	0.999876	14709	1	0.034704	0.087449	0.988421	1770	3	1770
OR4C16	4	0.1422	0.26635	0.99646	5357	2	0.034717	0.087472	0.988421	1771	1	1771
CXCL1	4	0.11908	0.24084	0.99646	4844	1	0.034725	0.087489	0.988421	1772	3	1772
SPDEF	4	0.7197	0.73299	0.999876	14692	1	0.034735	0.087505	0.988421	1773	2	1773
MLYCD	4	0.34813	0.48246	0.99918	9700	2	0.034751	0.087539	0.988421	1774	2	1774
TMEM135	4	0.033756	0.084754	0.982438	1715	2	0.034768	0.087566	0.988421	1775	1	1775
MARVELD3	4	0.35576	0.49032	0.999404	9864	2	0.034819	0.087672	0.988421	1776	1	1776
FDFT1	4	0.9511	0.95095	0.999876	19063	0	0.034879	0.087793	0.988421	1777	2	1777
AVPR1B	4	0.34008	0.47394	0.99918	9512	2	0.034894	0.087826	0.988421	1778	2	1778
RUFY2	4	0.47511	0.58701	0.999876	11774	1	0.034955	0.087942	0.988421	1779	3	1779
SH3BP1	4	0.71559	0.72989	0.999876	14638	1	0.034969	0.087972	0.988421	1780	2	1780
RTKN2	4	0.75215	0.75833	0.999876	15190	1	0.034969	0.087972	0.988421	1781	2	1781
SIX4	4	0.75652	0.76187	0.999876	15268	1	0.03497	0.087976	0.988421	1782	1	1782
UPRT	4	0.92748	0.92742	0.999876	18602	0	0.034996	0.08803	0.988421	1783	3	1783
HIST1H2BO	4	0.5547	0.62802	0.999876	12574	1	0.03503	0.08809	0.988421	1784	3	1784
FOXK1	4	0.93843	0.93835	0.999876	18833	0	0.035075	0.088194	0.988421	1785	2	1785
WNT10B	4	0.14227	0.26642	0.99646	5359	2	0.035122	0.088281	0.988421	1786	2	1786
ZSCAN21	4	0.81408	0.81402	0.999876	16347	1	0.03513	0.088293	0.988421	1787	3	1787
CENPW	4	0.73535	0.74494	0.999876	14920	1	0.035172	0.088387	0.988421	1788	2	1788
ARHGAP23	4	0.82914	0.829	0.999876	16645	0	0.035223	0.088487	0.988421	1789	3	1789
HIST1H2BA	4	0.89467	0.89455	0.999876	17951	0	0.035267	0.088567	0.988421	1790	3	1790
PSG6	4	0.70314	0.72071	0.999876	14445	1	0.035274	0.088584	0.988421	1791	1	1791
BTF3L4	4	0.93742	0.93734	0.999876	18808	0	0.035293	0.088623	0.988421	1792	2	1792
SLC25A18	4	0.75469	0.76039	0.999876	15230	1	0.035304	0.088642	0.988421	1793	2	1793
MCEMP1	4	0.049898	0.11629	0.982438	2362	1	0.035331	0.088694	0.988421	1794	3	1794
ADRBK2	4	0.48703	0.59284	0.999876	11900	1	0.035363	0.088762	0.988421	1795	2	1795
EMID1	4	0.23359	0.36301	0.99918	7297	1	0.035375	0.088793	0.988421	1796	2	1796
CLMN	4	0.0046391	0.015553	0.942548	328	2	0.035425	0.088894	0.988421	1797	2	1797
GMDS	4	0.082241	0.17633	0.993996	3564	2	0.035469	0.088979	0.988421	1798	2	1798
COQ7	4	0.46591	0.58248	0.999876	11675	1	0.035507	0.089049	0.988421	1799	2	1799
DGKZ	4	0.95269	0.95256	0.999876	19095	0	0.035582	0.089181	0.988421	1800	3	1800
HIPK4	4	0.49969	0.59918	0.999876	12010	1	0.035603	0.089229	0.988421	1801	3	1801
FBXO47	4	0.81635	0.81628	0.999876	16391	0	0.035625	0.08927	0.988421	1802	3	1802
ILF3	4	0.26841	0.39945	0.99918	8018	1	0.035627	0.089279	0.988421	1803	2	1803
SEPT4	4	0.47605	0.58746	0.999876	11784	1	0.035646	0.089314	0.988421	1804	3	1804
FFAR3	4	0.4154	0.55268	0.999876	11081	1	0.035728	0.089464	0.988421	1805	2	1805
NOL11	4	0.12792	0.25118	0.99646	5067	1	0.035734	0.089476	0.988421	1806	3	1806
GALK1	4	0.065125	0.14503	0.989736	2945	2	0.035759	0.089522	0.988421	1807	2	1807
OR4F6	4	0.13218	0.25574	0.99646	5158	2	0.035759	0.089522	0.988421	1808	2	1808
TAS2R3	4	0.66955	0.69712	0.999876	13985	1	0.035766	0.089536	0.988421	1809	3	1809
METTL4	4	0.78414	0.78571	0.999876	15756	1	0.035779	0.089563	0.988421	1810	1	1810
CACNG2	4	0.36375	0.49861	0.999876	10019	2	0.035829	0.089662	0.988421	1811	2	1811
HOXC4	4	0.83733	0.83716	0.999876	16805	0	0.035893	0.08978	0.988421	1812	2	1812
TULP1	4	0.49345	0.59606	0.999876	11948	1	0.03593	0.089864	0.988421	1813	2	1813
MYL12B	4	0.86637	0.86628	0.999876	17363	0	0.035957	0.089918	0.988421	1814	2	1814
MCOLN2	4	0.90544	0.90524	0.999876	18169	0	0.035961	0.089923	0.988421	1815	3	1815
NonTargetingControl_97	1	0.96404	0.96395	0.999876	19325	0	0.035964	0.089932	0.988421	1816	1	1816
NonTargetingControl_334	1	0.96401	0.96392	0.999876	19324	0	0.03599	0.089974	0.988421	1817	1	1817
PRAP1	4	0.43823	0.56931	0.999876	11402	1	0.035995	0.089983	0.988421	1818	2	1818
SPATC1L	4	0.17033	0.29615	0.99646	5954	2	0.036006	0.090008	0.988421	1820	1	1819
USP31	4	0.4358	0.5682	0.999876	11372	1	0.036006	0.090008	0.988421	1819	2	1820
KRT73	4	0.017717	0.051817	0.97167	1067	1	0.036065	0.090122	0.988421	1821	2	1821
PRIMA1	4	0.56862	0.63573	0.999876	12747	1	0.036082	0.090152	0.988421	1822	1	1822
HSD17B3	4	0.063368	0.14172	0.988862	2882	1	0.036097	0.090186	0.988421	1823	2	1823
FAM63B	4	0.70002	0.71846	0.999876	14405	1	0.036133	0.090263	0.988421	1824	3	1824
NonTargetingControl_986	1	0.96387	0.96378	0.999876	19322	0	0.036133	0.090264	0.988421	1825	1	1825
CLRN2	4	0.66564	0.69456	0.999876	13921	1	0.036151	0.090297	0.988421	1826	2	1826
MUC5AC	4	0.11115	0.22722	0.99646	4564	1	0.036167	0.090337	0.988421	1827	2	1827
NLRP9	4	0.59498	0.65071	0.999876	13038	1	0.036183	0.090366	0.988421	1828	2	1828
SSBP4	4	0.3804	0.51596	0.999876	10363	2	0.036189	0.090379	0.988421	1829	2	1829
PRB1	4	0.96381	0.96372	0.999876	19321	0	0.03619	0.090381	0.988421	1830	3	1830
NIPA2	4	0.14386	0.26812	0.99646	5386	1	0.036216	0.090429	0.988421	1831	3	1831
ZNRF2	4	0.65245	0.68593	0.999876	13761	1	0.036234	0.090461	0.988421	1832	1	1832
ADPRH	4	0.41566	0.55293	0.999876	11086	1	0.036237	0.090469	0.988421	1833	3	1833
TMEM230	4	0.61307	0.6614	0.999876	13269	1	0.036243	0.090484	0.988421	1834	3	1834
KAT8	4	0.37751	0.51294	0.999876	10294	1	0.03628	0.090554	0.988421	1836	2	1835
CENPQ	4	0.75719	0.76241	0.999876	15284	1	0.03628	0.090554	0.988421	1835	2	1836
ESR2	4	0.23214	0.36145	0.99918	7266	2	0.036334	0.090657	0.988421	1837	2	1837
TCF7L2	4	0.9342	0.93417	0.999876	18751	0	0.036377	0.090758	0.988421	1838	3	1838
MDN1	4	0.17247	0.29844	0.99646	5999	2	0.036385	0.090769	0.988421	1839	1	1839
TDRD6	4	0.92972	0.92967	0.999876	18653	0	0.036422	0.090844	0.988421	1840	3	1840
RC3H2	4	0.35281	0.48726	0.999404	9794	2	0.036436	0.090872	0.988421	1841	2	1841
ENOX1	4	0.94915	0.949	0.999876	19027	0	0.036448	0.0909	0.988421	1842	3	1842
B3GNT9	4	0.92818	0.92809	0.999876	18617	0	0.036491	0.090982	0.988421	1843	3	1843
ERICH4	4	0.82704	0.8269	0.999876	16606	0	0.036521	0.091039	0.988421	1844	3	1844
TCEANC	4	0.95327	0.95313	0.999876	19107	0	0.036521	0.091039	0.988421	1845	3	1845
LAMTOR5	4	0.3371	0.47091	0.99918	9442	2	0.036537	0.09107	0.988421	1846	1	1846
CFTR	4	0.88155	0.88146	0.999876	17683	0	0.036586	0.091171	0.988421	1847	3	1847
HEATR4	4	0.83623	0.83603	0.999876	16778	0	0.036587	0.091173	0.988421	1848	1	1848
MTF2	4	0.041073	0.099215	0.982438	2019	2	0.036594	0.091187	0.988421	1849	2	1849
RAB9B	4	0.48549	0.59211	0.999876	11882	1	0.036626	0.091239	0.988421	1850	2	1850
CTXN2	4	0.15986	0.28495	0.99646	5744	2	0.036638	0.091258	0.988421	1851	1	1851
PCYT1B	4	0.29985	0.43232	0.99918	8682	2	0.03667	0.091322	0.988421	1852	2	1852
CHODL	4	0.91103	0.91084	0.999876	18270	0	0.036702	0.091382	0.988421	1853	2	1853
TRIM72	4	0.14839	0.27293	0.99646	5485	2	0.036739	0.09145	0.988421	1854	1	1854
ALDH3A1	4	0.71041	0.72608	0.999876	14562	1	0.036745	0.091466	0.988421	1855	3	1855
UQCRQ	4	0.47005	0.58447	0.999876	11717	1	0.036817	0.091618	0.988421	1856	3	1856
TBX4	4	0.43303	0.56694	0.999876	11356	1	0.036839	0.091667	0.988421	1857	1	1857
PERP	4	0.09716	0.20277	0.99646	4079	1	0.036854	0.091703	0.988421	1858	3	1858
ENPP2	4	0.42816	0.56468	0.999876	11317	1	0.036856	0.091705	0.988421	1859	3	1859
MOBP	4	0.86657	0.86647	0.999876	17365	0	0.036865	0.091719	0.988421	1860	2	1860
TFAP2B	4	0.72654	0.73814	0.999876	14796	1	0.03689	0.091762	0.988421	1861	1	1861
ZNF596	4	0.28459	0.41634	0.99918	8360	1	0.036898	0.091776	0.988421	1862	2	1862
CNTNAP2	4	0.92063	0.92048	0.999876	18474	0	0.036922	0.091824	0.988421	1863	3	1863
CCDC124	4	0.73039	0.74108	0.999876	14849	1	0.036938	0.091856	0.988421	1864	3	1864
NonTargetingControl_19	1	0.96306	0.96296	0.999876	19305	0	0.036938	0.091856	0.988421	1865	1	1865
PRB4	4	0.9258	0.92568	0.999876	18566	0	0.036989	0.091961	0.988421	1866	3	1866
MED12L	4	0.46339	0.5813	0.999876	11649	1	0.037041	0.092057	0.988421	1867	2	1867
RAB25	4	0.48588	0.5923	0.999876	11887	1	0.037055	0.092083	0.988421	1868	2	1868
GTF2H4	4	0.86317	0.86311	0.999876	17298	0	0.037092	0.092158	0.988421	1869	1	1869
KRTAP23-1	4	0.27209	0.40334	0.99918	8091	2	0.037142	0.09227	0.988421	1870	2	1870
MRPL30	4	0.36425	0.49912	0.999876	10029	2	0.037224	0.092443	0.988421	1871	2	1871
PTPRCAP	4	0.38787	0.52371	0.999876	10510	1	0.037294	0.092591	0.988421	1872	2	1872
FAM21A	4	0.92005	0.91986	0.999876	18458	0	0.037306	0.092618	0.988421	1873	3	1873
ANKRD22	4	0.84211	0.84195	0.999876	16900	0	0.037312	0.092634	0.988421	1874	2	1874
LSG1	4	0.014075	0.044143	0.97167	898	1	0.03733	0.092667	0.988421	1875	3	1875
TMEM178B	4	0.75769	0.76282	0.999876	15295	1	0.037366	0.092737	0.988421	1876	2	1876
MAL2	4	0.5224	0.6109	0.999876	12251	1	0.037388	0.09279	0.988421	1877	2	1877
ATP12A	4	0.95578	0.95561	0.999876	19163	0	0.037391	0.092794	0.988421	1878	3	1878
TSC22D2	4	0.66164	0.6919	0.999876	13878	1	0.037403	0.092822	0.988421	1879	3	1879
ACER2	4	0.66776	0.69594	0.999876	13960	1	0.037403	0.092822	0.988421	1880	3	1880
COL21A1	4	0.84358	0.84345	0.999876	16929	0	0.037445	0.092898	0.988421	1881	2	1881
GFRA2	4	0.61036	0.65982	0.999876	13237	1	0.0375	0.093004	0.988421	1882	3	1882
IQCH	4	0.38461	0.52034	0.999876	10444	2	0.037558	0.09312	0.988421	1883	2	1883
STX8	4	0.96417	0.96408	0.999876	19327	0	0.037597	0.093192	0.988421	1884	3	1884
CCDC172	4	0.77116	0.77418	0.999876	15521	1	0.037607	0.093214	0.988421	1885	2	1885
C10orf120	4	0.93829	0.93821	0.999876	18830	0	0.037643	0.093294	0.988421	1886	3	1886
HIST1H4I	4	0.53121	0.61546	0.999876	12352	1	0.037651	0.093308	0.988421	1887	3	1887
TIFAB	4	0.51535	0.60724	0.999876	12176	1	0.037682	0.093364	0.988421	1888	3	1888
FAM72C	4	0.9337	0.93366	0.999876	18741	0	0.037697	0.093392	0.988421	1889	1	1889
ZNF626	4	0.976	0.97593	0.999876	19569	0	0.037725	0.093453	0.988421	1890	3	1890
CLGN	4	0.089078	0.18857	0.99646	3796	1	0.037737	0.093484	0.988421	1891	3	1891
UBTF	4	0.81139	0.81132	0.999876	16287	1	0.037792	0.093585	0.988421	1892	3	1892
SERINC2	4	0.29513	0.42744	0.99918	8586	1	0.037798	0.093599	0.988421	1893	3	1893
KIR2DL4	4	0.95951	0.95932	0.999876	19236	0	0.037798	0.093599	0.988421	1894	2	1894
JARID2	4	0.13753	0.2614	0.99646	5270	2	0.037849	0.09369	0.988421	1895	2	1895
DACT2	4	0.87454	0.87445	0.999876	17555	0	0.037875	0.093744	0.988421	1896	3	1896
L3MBTL3	4	0.33796	0.47178	0.99918	9471	1	0.037899	0.093799	0.988421	1897	2	1897
NACAD	4	0.10595	0.21819	0.99646	4391	2	0.037909	0.093821	0.988421	1898	2	1898
PNMA6A	4	0.62728	0.67006	0.999876	13428	1	0.037909	0.093821	0.988421	1899	2	1899
PNPLA7	4	0.92222	0.92208	0.999876	18501	0	0.037942	0.093889	0.988421	1900	2	1900
KLHL2	4	0.016086	0.048387	0.97167	993	3	0.03795	0.093904	0.988421	1901	1	1901
HIST1H2BD	4	0.94618	0.946	0.999876	18970	0	0.037963	0.093932	0.988421	1902	3	1902
CNIH4	4	0.38016	0.51569	0.999876	10358	1	0.038003	0.094023	0.988421	1903	3	1903
EPHA10	4	0.2868	0.41867	0.99918	8411	2	0.038051	0.094121	0.988421	1904	2	1904
LSM1	4	0.17383	0.2999	0.99646	6035	1	0.038052	0.094128	0.988421	1905	2	1905
TPO	4	0.19244	0.31955	0.997888	6425	2	0.038091	0.094198	0.988421	1906	2	1906
LCMT2	4	0.20869	0.33669	0.997888	6780	1	0.038101	0.094219	0.988421	1907	2	1907
TCP1	4	0.38311	0.51876	0.999876	10415	2	0.038151	0.094308	0.988421	1908	1	1908
STEAP4	4	0.68944	0.71087	0.999876	14255	1	0.038202	0.094401	0.988421	1909	1	1909
OR4S1	4	0.79206	0.79288	0.999876	15920	1	0.038223	0.094437	0.988421	1910	3	1910
POLE2	4	0.96498	0.96487	0.999876	19342	0	0.038267	0.094516	0.988421	1911	3	1911
CCNE1	4	0.87227	0.87218	0.999876	17496	0	0.038301	0.094581	0.988421	1912	3	1912
JMY	4	0.98292	0.9829	0.999876	19707	0	0.038313	0.0946	0.988421	1913	3	1913
TMEM156	4	0.029486	0.076234	0.982438	1549	2	0.038328	0.094629	0.988421	1914	2	1914
MICU3	4	0.66422	0.69359	0.999876	13905	1	0.038372	0.094707	0.988421	1915	2	1915
NUP88	4	0.72783	0.73914	0.999876	14810	1	0.038375	0.094711	0.988421	1916	3	1916
UBE2L6	4	0.64632	0.68204	0.999876	13666	1	0.038404	0.094755	0.988421	1917	1	1917
KSR1	4	0.93552	0.9355	0.999876	18781	0	0.038418	0.094783	0.988421	1918	3	1918
CRADD	4	0.088835	0.18815	0.99646	3785	1	0.038439	0.094826	0.988421	1919	3	1919
UQCC2	4	0.045752	0.10838	0.982438	2201	2	0.038454	0.094853	0.988421	1920	1	1920
ZFYVE1	4	0.18872	0.31558	0.997457	6361	1	0.038457	0.09486	0.988421	1921	2	1921
C5orf63	4	0.96151	0.9614	0.999876	19274	0	0.038493	0.094927	0.988421	1922	3	1922
GSTT2B	4	0.54016	0.62017	0.999876	12435	1	0.038522	0.094979	0.988421	1923	2	1923
ITFG2	4	0.13626	0.26006	0.99646	5244	1	0.03853	0.094992	0.988421	1924	2	1924
TIMELESS	4	0.89411	0.89397	0.999876	17930	0	0.038535	0.095002	0.988421	1925	3	1925
SCEL	4	0.81693	0.81685	0.999876	16401	0	0.038573	0.095083	0.988421	1926	2	1926
DDX56	4	0.85258	0.85245	0.999876	17105	0	0.038577	0.095093	0.988421	1927	2	1927
GAK	4	0.014537	0.045108	0.97167	913	1	0.038605	0.095146	0.988421	1928	1	1928
RBM14-RBM4	4	0.74249	0.75052	0.999876	15027	1	0.038611	0.095158	0.988421	1929	3	1929
NonTargetingControl_395	1	0.96139	0.96128	0.999876	19272	0	0.038612	0.095164	0.988421	1930	1	1930
NonTargetingControl_75	1	0.96137	0.96127	0.999876	19270	0	0.038625	0.095182	0.988421	1931	1	1931
SSUH2	4	0.92923	0.92916	0.999876	18641	0	0.03864	0.095205	0.988421	1932	3	1932
NonTargetingControl_969	1	0.96132	0.96122	0.999876	19269	0	0.038684	0.095296	0.988421	1933	1	1933
TMSB4Y	4	0.041557	0.10015	0.982438	2041	3	0.038706	0.095339	0.988421	1934	1	1934
CYSLTR2	4	0.47016	0.58453	0.999876	11718	1	0.038716	0.095352	0.988421	1935	2	1935
BICD2	4	0.91666	0.91647	0.999876	18391	0	0.03876	0.095441	0.988421	1936	2	1936
MALT1	4	0.25685	0.38739	0.99918	7791	2	0.038805	0.095535	0.988421	1937	2	1937
SLC35F1	4	0.61133	0.66038	0.999876	13247	1	0.038807	0.095541	0.988421	1938	2	1938
PALMD	4	0.82169	0.82164	0.999876	16494	0	0.038814	0.095559	0.988421	1939	3	1939
IMMP1L	4	0.33859	0.47241	0.99918	9484	2	0.038958	0.095835	0.988421	1940	2	1940
EIF3M	4	0.23464	0.3641	0.99918	7316	2	0.039008	0.095947	0.988421	1941	2	1941
SQRDL	4	0.7729	0.77573	0.999876	15554	1	0.039019	0.095968	0.988421	1942	3	1942
KIRREL2	4	0.17913	0.30544	0.99646	6159	2	0.039059	0.096052	0.988421	1943	1	1943
FRMD1	4	0.98059	0.98058	0.999876	19664	0	0.039072	0.096079	0.988421	1944	3	1944
OPALIN	4	0.65166	0.68544	0.999876	13748	1	0.039109	0.096157	0.988421	1945	1	1945
SMYD3	4	0.63073	0.67222	0.999876	13468	1	0.039128	0.09619	0.988421	1946	3	1946
SH2D2A	4	0.12384	0.24682	0.99646	4975	1	0.039155	0.09624	0.988421	1947	3	1947
POLE3	4	0.58313	0.64386	0.999876	12909	1	0.03916	0.096246	0.988421	1948	3	1948
PMF1	4	0.96081	0.9607	0.999876	19258	0	0.03919	0.096305	0.988421	1949	3	1949
TBC1D20	4	0.66631	0.695	0.999876	13935	1	0.03921	0.09634	0.988421	1950	2	1950
MOV10	4	0.14858	0.27313	0.99646	5490	2	0.039245	0.096405	0.988421	1951	2	1951
STXBP2	4	0.23516	0.36461	0.99918	7329	2	0.039278	0.096466	0.988421	1952	2	1952
G6PC2	4	0.40647	0.54331	0.999876	10894	1	0.039311	0.096529	0.988421	1953	2	1953
CNTRL	4	0.28811	0.42007	0.99918	8437	1	0.039381	0.09668	0.988421	1954	3	1954
TMEM38B	4	0.91065	0.91047	0.999876	18259	0	0.03939	0.096702	0.988421	1955	2	1955
MEF2BNB-MEF2B	4	0.9731	0.97304	0.999876	19522	0	0.039393	0.096709	0.988421	1956	3	1956
ERP29	4	0.79011	0.79112	0.999876	15887	1	0.039412	0.096746	0.988421	1957	3	1957
CHMP6	4	0.83613	0.83593	0.999876	16777	0	0.039415	0.096752	0.988421	1958	3	1958
FAM98C	4	0.8596	0.85952	0.999876	17234	0	0.039415	0.096752	0.988421	1959	3	1959
CATSPERB	4	0.19413	0.32133	0.997888	6459	1	0.039431	0.096794	0.988421	1960	3	1960
CEACAM7	4	0.61052	0.65991	0.999876	13240	1	0.03944	0.096811	0.988421	1961	3	1961
UQCC3	4	0.85776	0.85769	0.999876	17196	0	0.03948	0.096884	0.988421	1962	2	1962
HMGA2	4	0.13619	0.25998	0.99646	5242	2	0.039512	0.09694	0.988421	1964	1	1963
FAM50A	4	0.8646	0.86451	0.999876	17324	0	0.039512	0.09694	0.988421	1963	3	1964
ATG3	4	0.12342	0.24639	0.99646	4964	1	0.039569	0.097036	0.988421	1965	3	1965
NonTargetingControl_347	1	0.9604	0.96028	0.999876	19253	0	0.039599	0.097092	0.988421	1966	1	1966
SLC25A10	4	0.61163	0.66055	0.999876	13250	1	0.039625	0.097138	0.988421	1967	2	1967
NFKBIB	4	0.91973	0.91953	0.999876	18451	0	0.039632	0.097149	0.988421	1968	3	1968
FCRL6	4	0.96126	0.96116	0.999876	19268	0	0.039644	0.097177	0.988421	1969	3	1969
RPH3A	4	0.98385	0.98385	0.999876	19721	0	0.039657	0.0972	0.988421	1970	3	1970
P2RX2	4	0.692	0.71269	0.999876	14286	1	0.039659	0.097203	0.988421	1971	2	1971
ZNF839	4	0.23766	0.36724	0.99918	7379	2	0.039726	0.097333	0.988421	1972	2	1972
RANBP17	4	0.72426	0.73643	0.999876	14758	1	0.039737	0.097359	0.988421	1973	3	1973
C11orf21	4	0.13419	0.25787	0.99646	5198	1	0.039764	0.097407	0.988421	1974	1	1974
GSTM2	4	0.18049	0.30689	0.99646	6192	2	0.039815	0.097519	0.988421	1975	1	1975
OR56B1	4	0.97978	0.97972	0.999876	19648	0	0.039865	0.097615	0.988421	1976	3	1976
ZNF785	4	0.077316	0.16746	0.992151	3387	3	0.039915	0.09771	0.988421	1977	1	1977
SCGB1D2	4	0.97936	0.97927	0.999876	19641	0	0.039934	0.097746	0.988421	1978	3	1978
PSMD7	4	0.86438	0.8643	0.999876	17320	0	0.03994	0.097759	0.988421	1979	2	1979
OR52N4	4	0.86815	0.86807	0.999876	17412	0	0.040016	0.097913	0.988421	1980	1	1980
WIPF2	4	0.86614	0.86605	0.999876	17356	0	0.040066	0.098026	0.988421	1981	2	1981
USP17L18	4	0.98361	0.9836	0.999876	19717	0	0.040158	0.098199	0.988421	1982	3	1982
ASNA1	4	0.92337	0.92324	0.999876	18525	0	0.040167	0.098221	0.988421	1983	3	1983
PMEL	4	0.17852	0.30484	0.99646	6142	1	0.040188	0.098255	0.988421	1984	2	1984
SELM	4	0.91053	0.91033	0.999876	18256	0	0.040188	0.098255	0.988421	1985	3	1985
TPPP2	4	0.094199	0.19751	0.99646	3976	2	0.04021	0.0983	0.988421	1986	2	1986
TSEN15	4	0.043898	0.10475	0.982438	2128	3	0.040217	0.098316	0.988421	1987	1	1987
GBA2	4	0.97939	0.97931	0.999876	19642	0	0.040233	0.098346	0.988421	1988	3	1988
TAC1	4	0.8569	0.85682	0.999876	17177	0	0.040268	0.098412	0.988421	1989	1	1989
ACTA2	4	0.95696	0.95679	0.999876	19190	0	0.040279	0.098435	0.988421	1990	3	1990
ALPL	4	0.96275	0.96268	0.999876	19301	0	0.040317	0.09851	0.988421	1991	3	1992
CPLX4	4	0.17828	0.30459	0.99646	6137	2	0.040318	0.09851	0.988421	1992	1	1991
AGPAT3	4	0.8043	0.80438	0.999876	16139	1	0.040352	0.098585	0.988421	1994	3	1993
LMOD3	4	0.91655	0.91637	0.999876	18388	0	0.040352	0.098585	0.988421	1993	3	1994
DUOX1	4	0.89448	0.89435	0.999876	17944	0	0.040379	0.098645	0.988421	1995	2	1995
USP17L5	4	0.95666	0.95649	0.999876	19180	0	0.040412	0.098701	0.988421	1996	3	1996
CXCL3	4	0.4209	0.55853	0.999876	11189	2	0.040464	0.098808	0.988421	1997	2	1997
MICU2	4	0.73576	0.74525	0.999876	14928	1	0.040464	0.098808	0.988421	1998	2	1998
ALDH3B2	4	0.32068	0.4538	0.99918	9119	2	0.040469	0.098816	0.988421	1999	2	1999
[truncated: 18,113 more rows]
